# Supplementary material for: An ontology-aware integration of clinical models, terminologies and guidelines: an exploratory study of the Scale for the Assessment and Rating of Ataxia (SARA)
Source: BMC Med Inform Decis Mak. 2017 Dec 6;17:159. doi: 10.1186/s12911-017-0568-4 (PMC5718136; doi:10.1186/s12911-017-0568-4)
Supplement: Supplementary file 2 — Contains the scaled-down version of the HPO (OWL 189 kb) [file 12911_2017_568_MOESM2_ESM.owl]

<?xml version="1.0"?>
<rdf:RDF xmlns="http://purl.obolibrary.org/obo/hp.owl#"
     xml:base="http://purl.obolibrary.org/obo/hp.owl"
     xmlns:owl="http://www.w3.org/2002/07/owl#"
     xmlns:oboInOwl="http://www.geneontology.org/formats/oboInOwl#"
     xmlns:hp="http://purl.obolibrary.org/obo/hp#"
     xmlns:xsd="http://www.w3.org/2001/XMLSchema#"
     xmlns:Wikipedia="http://purl.obolibrary.org/obo/Wikipedia#"
     xmlns:rdfs="http://www.w3.org/2000/01/rdf-schema#"
     xmlns:hp2="http://purl.obolibrary.org/obo/hp.owl#"
     xmlns:rdf="http://www.w3.org/1999/02/22-rdf-syntax-ns#"
     xmlns:xml="http://www.w3.org/XML/1998/namespace"
     xmlns:hsapdv="http://purl.obolibrary.org/obo/hsapdv#"
     xmlns:obo="http://purl.obolibrary.org/obo/"
     xmlns:foaf="http://xmlns.com/foaf/0.1/"
     xmlns:dc="http://purl.org/dc/elements/1.1/">
    <owl:Ontology rdf:about="http://purl.obolibrary.org/obo/hp.owl">
        <owl:versionIRI rdf:resource="http://purl.obolibrary.org/obo/hp/releases/2017-10-05/hp.owl"/>
        <owl:imports rdf:resource="http://purl.obolibrary.org/obo/upheno/imports/pr_import.owl"/>
        <owl:imports rdf:resource="http://purl.obolibrary.org/obo/upheno/imports/extra.owl"/>
        <owl:imports rdf:resource="http://purl.obolibrary.org/obo/upheno/imports/ro_extra.owl"/>
        <owl:imports rdf:resource="http://purl.obolibrary.org/obo/upheno/imports/chebi_import.owl"/>
        <owl:imports rdf:resource="http://purl.obolibrary.org/obo/upheno/imports/hsapdv_import.owl"/>
        <owl:imports rdf:resource="http://purl.obolibrary.org/obo/upheno/imports/uberon_import.owl"/>
        <owl:imports rdf:resource="http://purl.obolibrary.org/obo/upheno/imports/pato_import.owl"/>
        <owl:imports rdf:resource="http://purl.obolibrary.org/obo/upheno/imports/nbo_import.owl"/>
        <owl:imports rdf:resource="http://purl.obolibrary.org/obo/upheno/imports/cl_import.owl"/>
        <owl:imports rdf:resource="http://purl.obolibrary.org/obo/upheno/imports/doid_import.owl"/>
        <owl:imports rdf:resource="http://purl.obolibrary.org/obo/upheno/imports/mpath_import.owl"/>
        <owl:imports rdf:resource="http://purl.obolibrary.org/obo/upheno/imports/go_import.owl"/>
        <dc:contributor>Chris Mungall</dc:contributor>
        <dc:contributor>Courtney Hum</dc:contributor>
        <dc:contributor>Mark Engelstad</dc:contributor>
        <dc:contributor>Sandra Doelken</dc:contributor>
        <dc:contributor>Melissa Haendel</dc:contributor>
        <dc:rights>Peter Robinson, Sebastian Koehler, The Human Phenotype Ontology Consortium, and The Monarch Initiative</dc:rights>
        <rdfs:comment rdf:datatype="http://www.w3.org/2001/XMLSchema#string">Please see license of HPO at http://www.human-phenotype-ontology.org</rdfs:comment>
        <dc:creator>Peter N Robinson</dc:creator>
        <dc:license>see http://www.human-phenotype-ontology.org</dc:license>
        <oboInOwl:saved-by rdf:datatype="http://www.w3.org/2001/XMLSchema#string">Peter Robinson, Sebastian Koehler, Sandra Doelken, Chris Mungall, Melissa Haendel, Nicole Vasilevsky, Monarch Initiative, et al.</oboInOwl:saved-by>
        <dc:creator>The Human Phenotype Ontology Consortium</dc:creator>
        <dc:creator>The Monarch Initiative</dc:creator>
        <dc:contributor>Nicole Vasilevsky</dc:contributor>
        <dc:creator>Sebastian Koehler</dc:creator>
        <dc:contributor>Joie Davis</dc:contributor>
        <oboInOwl:logical-definition-view-relation rdf:datatype="http://www.w3.org/2001/XMLSchema#string">has_part</oboInOwl:logical-definition-view-relation>
        <dc:subject>Phenotypic abnormalities encountered in human disease</dc:subject>
        <oboInOwl:default-namespace rdf:datatype="http://www.w3.org/2001/XMLSchema#string">human_phenotype</oboInOwl:default-namespace>
    </owl:Ontology>
    


    <!-- 
    ///////////////////////////////////////////////////////////////////////////////////////
    //
    // Annotation properties
    //
    ///////////////////////////////////////////////////////////////////////////////////////
     -->

    


    <!-- http://purl.obolibrary.org/obo/HP_0045076 -->

    <owl:AnnotationProperty rdf:about="http://purl.obolibrary.org/obo/HP_0045076">
        <rdfs:label>UK spelling</rdfs:label>
        <rdfs:subPropertyOf rdf:resource="http://www.geneontology.org/formats/oboInOwl#SynonymTypeProperty"/>
    </owl:AnnotationProperty>
    


    <!-- http://purl.obolibrary.org/obo/HP_0045077 -->

    <owl:AnnotationProperty rdf:about="http://purl.obolibrary.org/obo/HP_0045077">
        <rdfs:label>abbreviation</rdfs:label>
        <rdfs:subPropertyOf rdf:resource="http://www.geneontology.org/formats/oboInOwl#SynonymTypeProperty"/>
    </owl:AnnotationProperty>
    


    <!-- http://purl.obolibrary.org/obo/HP_0045078 -->

    <owl:AnnotationProperty rdf:about="http://purl.obolibrary.org/obo/HP_0045078">
        <rdfs:label>plural form</rdfs:label>
        <rdfs:subPropertyOf rdf:resource="http://www.geneontology.org/formats/oboInOwl#SynonymTypeProperty"/>
    </owl:AnnotationProperty>
    


    <!-- http://purl.obolibrary.org/obo/IAO_0000115 -->

    <owl:AnnotationProperty rdf:about="http://purl.obolibrary.org/obo/IAO_0000115">
        <rdfs:label rdf:datatype="http://www.w3.org/2001/XMLSchema#string">definition</rdfs:label>
    </owl:AnnotationProperty>
    


    <!-- http://purl.obolibrary.org/obo/IAO_0100001 -->

    <owl:AnnotationProperty rdf:about="http://purl.obolibrary.org/obo/IAO_0100001">
        <rdfs:label rdf:datatype="http://www.w3.org/2001/XMLSchema#string">term replaced by</rdfs:label>
    </owl:AnnotationProperty>
    


    <!-- http://purl.obolibrary.org/obo/hp#hposlim_core -->

    <owl:AnnotationProperty rdf:about="http://purl.obolibrary.org/obo/hp#hposlim_core">
        <rdfs:comment rdf:datatype="http://www.w3.org/2001/XMLSchema#string">Core clinical terminology</rdfs:comment>
        <rdfs:subPropertyOf rdf:resource="http://www.geneontology.org/formats/oboInOwl#SubsetProperty"/>
    </owl:AnnotationProperty>
    


    <!-- http://purl.obolibrary.org/obo/hp#secondary_consequence -->

    <owl:AnnotationProperty rdf:about="http://purl.obolibrary.org/obo/hp#secondary_consequence">
        <rdfs:comment rdf:datatype="http://www.w3.org/2001/XMLSchema#string">Consequence of a disorder in another organ system.</rdfs:comment>
        <rdfs:subPropertyOf rdf:resource="http://www.geneontology.org/formats/oboInOwl#SubsetProperty"/>
    </owl:AnnotationProperty>
    


    <!-- http://purl.obolibrary.org/obo/hp.owl#layperson -->

    <owl:AnnotationProperty rdf:about="http://purl.obolibrary.org/obo/hp.owl#layperson">
        <rdfs:label>layperson term</rdfs:label>
        <rdfs:subPropertyOf rdf:resource="http://www.geneontology.org/formats/oboInOwl#SynonymTypeProperty"/>
    </owl:AnnotationProperty>
    


    <!-- http://purl.obolibrary.org/obo/hsapdv#editor_notes -->

    <owl:AnnotationProperty rdf:about="http://purl.obolibrary.org/obo/hsapdv#editor_notes"/>
    


    <!-- http://purl.obolibrary.org/obo/hsapdv#end_dpf -->

    <owl:AnnotationProperty rdf:about="http://purl.obolibrary.org/obo/hsapdv#end_dpf"/>
    


    <!-- http://purl.org/dc/elements/1.1/contributor -->

    <owl:AnnotationProperty rdf:about="http://purl.org/dc/elements/1.1/contributor"/>
    


    <!-- http://purl.org/dc/elements/1.1/creator -->

    <owl:AnnotationProperty rdf:about="http://purl.org/dc/elements/1.1/creator"/>
    


    <!-- http://purl.org/dc/elements/1.1/date -->

    <owl:AnnotationProperty rdf:about="http://purl.org/dc/elements/1.1/date"/>
    


    <!-- http://purl.org/dc/elements/1.1/license -->

    <owl:AnnotationProperty rdf:about="http://purl.org/dc/elements/1.1/license"/>
    


    <!-- http://purl.org/dc/elements/1.1/rights -->

    <owl:AnnotationProperty rdf:about="http://purl.org/dc/elements/1.1/rights"/>
    


    <!-- http://purl.org/dc/elements/1.1/subject -->

    <owl:AnnotationProperty rdf:about="http://purl.org/dc/elements/1.1/subject"/>
    


    <!-- http://www.geneontology.org/formats/oboInOwl#SubsetProperty -->

    <owl:AnnotationProperty rdf:about="http://www.geneontology.org/formats/oboInOwl#SubsetProperty">
        <rdfs:label rdf:datatype="http://www.w3.org/2001/XMLSchema#string">subset_property</rdfs:label>
    </owl:AnnotationProperty>
    


    <!-- http://www.geneontology.org/formats/oboInOwl#SynonymTypeProperty -->

    <owl:AnnotationProperty rdf:about="http://www.geneontology.org/formats/oboInOwl#SynonymTypeProperty"/>
    


    <!-- http://www.geneontology.org/formats/oboInOwl#auto-generated-by -->

    <owl:AnnotationProperty rdf:about="http://www.geneontology.org/formats/oboInOwl#auto-generated-by"/>
    


    <!-- http://www.geneontology.org/formats/oboInOwl#consider -->

    <owl:AnnotationProperty rdf:about="http://www.geneontology.org/formats/oboInOwl#consider">
        <rdfs:label rdf:datatype="http://www.w3.org/2001/XMLSchema#string">consider</rdfs:label>
    </owl:AnnotationProperty>
    


    <!-- http://www.geneontology.org/formats/oboInOwl#created_by -->

    <owl:AnnotationProperty rdf:about="http://www.geneontology.org/formats/oboInOwl#created_by"/>
    


    <!-- http://www.geneontology.org/formats/oboInOwl#creation_date -->

    <owl:AnnotationProperty rdf:about="http://www.geneontology.org/formats/oboInOwl#creation_date"/>
    


    <!-- http://www.geneontology.org/formats/oboInOwl#date -->

    <owl:AnnotationProperty rdf:about="http://www.geneontology.org/formats/oboInOwl#date"/>
    


    <!-- http://www.geneontology.org/formats/oboInOwl#default-namespace -->

    <owl:AnnotationProperty rdf:about="http://www.geneontology.org/formats/oboInOwl#default-namespace"/>
    


    <!-- http://www.geneontology.org/formats/oboInOwl#hasAlternativeId -->

    <owl:AnnotationProperty rdf:about="http://www.geneontology.org/formats/oboInOwl#hasAlternativeId">
        <rdfs:label rdf:datatype="http://www.w3.org/2001/XMLSchema#string">has_alternative_id</rdfs:label>
    </owl:AnnotationProperty>
    


    <!-- http://www.geneontology.org/formats/oboInOwl#hasBroadSynonym -->

    <owl:AnnotationProperty rdf:about="http://www.geneontology.org/formats/oboInOwl#hasBroadSynonym">
        <rdfs:label rdf:datatype="http://www.w3.org/2001/XMLSchema#string">has_broad_synonym</rdfs:label>
    </owl:AnnotationProperty>
    


    <!-- http://www.geneontology.org/formats/oboInOwl#hasDbXref -->

    <owl:AnnotationProperty rdf:about="http://www.geneontology.org/formats/oboInOwl#hasDbXref">
        <rdfs:label rdf:datatype="http://www.w3.org/2001/XMLSchema#string">database_cross_reference</rdfs:label>
    </owl:AnnotationProperty>
    


    <!-- http://www.geneontology.org/formats/oboInOwl#hasExactSynonym -->

    <owl:AnnotationProperty rdf:about="http://www.geneontology.org/formats/oboInOwl#hasExactSynonym">
        <rdfs:label rdf:datatype="http://www.w3.org/2001/XMLSchema#string">has_exact_synonym</rdfs:label>
    </owl:AnnotationProperty>
    


    <!-- http://www.geneontology.org/formats/oboInOwl#hasNarrowSynonym -->

    <owl:AnnotationProperty rdf:about="http://www.geneontology.org/formats/oboInOwl#hasNarrowSynonym">
        <rdfs:label rdf:datatype="http://www.w3.org/2001/XMLSchema#string">has_narrow_synonym</rdfs:label>
    </owl:AnnotationProperty>
    


    <!-- http://www.geneontology.org/formats/oboInOwl#hasOBOFormatVersion -->

    <owl:AnnotationProperty rdf:about="http://www.geneontology.org/formats/oboInOwl#hasOBOFormatVersion">
        <rdfs:label rdf:datatype="http://www.w3.org/2001/XMLSchema#string">has_obo_format_version</rdfs:label>
    </owl:AnnotationProperty>
    


    <!-- http://www.geneontology.org/formats/oboInOwl#hasOBONamespace -->

    <owl:AnnotationProperty rdf:about="http://www.geneontology.org/formats/oboInOwl#hasOBONamespace">
        <rdfs:label rdf:datatype="http://www.w3.org/2001/XMLSchema#string">has_obo_namespace</rdfs:label>
    </owl:AnnotationProperty>
    


    <!-- http://www.geneontology.org/formats/oboInOwl#hasRelatedSynonym -->

    <owl:AnnotationProperty rdf:about="http://www.geneontology.org/formats/oboInOwl#hasRelatedSynonym">
        <rdfs:label rdf:datatype="http://www.w3.org/2001/XMLSchema#string">has_related_synonym</rdfs:label>
    </owl:AnnotationProperty>
    


    <!-- http://www.geneontology.org/formats/oboInOwl#hasSynonymType -->

    <owl:AnnotationProperty rdf:about="http://www.geneontology.org/formats/oboInOwl#hasSynonymType"/>
    


    <!-- http://www.geneontology.org/formats/oboInOwl#id -->

    <owl:AnnotationProperty rdf:about="http://www.geneontology.org/formats/oboInOwl#id"/>
    


    <!-- http://www.geneontology.org/formats/oboInOwl#inSubset -->

    <owl:AnnotationProperty rdf:about="http://www.geneontology.org/formats/oboInOwl#inSubset">
        <rdfs:label rdf:datatype="http://www.w3.org/2001/XMLSchema#string">in_subset</rdfs:label>
    </owl:AnnotationProperty>
    


    <!-- http://www.geneontology.org/formats/oboInOwl#is_anonymous -->

    <owl:AnnotationProperty rdf:about="http://www.geneontology.org/formats/oboInOwl#is_anonymous"/>
    


    <!-- http://www.geneontology.org/formats/oboInOwl#is_inferred -->

    <owl:AnnotationProperty rdf:about="http://www.geneontology.org/formats/oboInOwl#is_inferred"/>
    


    <!-- http://www.geneontology.org/formats/oboInOwl#logical-definition-view-relation -->

    <owl:AnnotationProperty rdf:about="http://www.geneontology.org/formats/oboInOwl#logical-definition-view-relation">
        <rdfs:label rdf:datatype="http://www.w3.org/2001/XMLSchema#string">logical-definition-view-relation</rdfs:label>
    </owl:AnnotationProperty>
    


    <!-- http://www.geneontology.org/formats/oboInOwl#saved-by -->

    <owl:AnnotationProperty rdf:about="http://www.geneontology.org/formats/oboInOwl#saved-by"/>
    


    <!-- http://www.geneontology.org/formats/oboInOwl#shorthand -->

    <owl:AnnotationProperty rdf:about="http://www.geneontology.org/formats/oboInOwl#shorthand">
        <rdfs:label rdf:datatype="http://www.w3.org/2001/XMLSchema#string">shorthand</rdfs:label>
    </owl:AnnotationProperty>
    


    <!-- http://www.w3.org/2000/01/rdf-schema#comment -->

    <owl:AnnotationProperty rdf:about="http://www.w3.org/2000/01/rdf-schema#comment"/>
    


    <!-- http://www.w3.org/2000/01/rdf-schema#label -->

    <owl:AnnotationProperty rdf:about="http://www.w3.org/2000/01/rdf-schema#label"/>
    


    <!-- http://www.w3.org/2002/07/owl#deprecated -->

    <owl:AnnotationProperty rdf:about="http://www.w3.org/2002/07/owl#deprecated"/>
    


    <!-- 
    ///////////////////////////////////////////////////////////////////////////////////////
    //
    // Object Properties
    //
    ///////////////////////////////////////////////////////////////////////////////////////
     -->

    


    <!-- http://purl.obolibrary.org/obo/BFO_0000050 -->

    <owl:ObjectProperty rdf:about="http://purl.obolibrary.org/obo/BFO_0000050">
        <oboInOwl:hasDbXref rdf:datatype="http://www.w3.org/2001/XMLSchema#string">BFO:0000050</oboInOwl:hasDbXref>
        <oboInOwl:id rdf:datatype="http://www.w3.org/2001/XMLSchema#string">part_of</oboInOwl:id>
        <oboInOwl:shorthand rdf:datatype="http://www.w3.org/2001/XMLSchema#string">part_of</oboInOwl:shorthand>
        <rdfs:label rdf:datatype="http://www.w3.org/2001/XMLSchema#string">part of</rdfs:label>
    </owl:ObjectProperty>
    


    <!-- http://purl.obolibrary.org/obo/BFO_0000051 -->

    <owl:ObjectProperty rdf:about="http://purl.obolibrary.org/obo/BFO_0000051">
        <oboInOwl:hasDbXref rdf:datatype="http://www.w3.org/2001/XMLSchema#string">BFO:0000051</oboInOwl:hasDbXref>
        <oboInOwl:id rdf:datatype="http://www.w3.org/2001/XMLSchema#string">has_part</oboInOwl:id>
        <oboInOwl:shorthand rdf:datatype="http://www.w3.org/2001/XMLSchema#string">has_part</oboInOwl:shorthand>
        <rdfs:label rdf:datatype="http://www.w3.org/2001/XMLSchema#string">has part</rdfs:label>
    </owl:ObjectProperty>
    


    <!-- http://purl.obolibrary.org/obo/BFO_0000066 -->

    <owl:ObjectProperty rdf:about="http://purl.obolibrary.org/obo/BFO_0000066">
        <oboInOwl:hasDbXref rdf:datatype="http://www.w3.org/2001/XMLSchema#string">BFO:0000066</oboInOwl:hasDbXref>
        <oboInOwl:id rdf:datatype="http://www.w3.org/2001/XMLSchema#string">occurs_in</oboInOwl:id>
        <oboInOwl:shorthand rdf:datatype="http://www.w3.org/2001/XMLSchema#string">occurs_in</oboInOwl:shorthand>
        <rdfs:label rdf:datatype="http://www.w3.org/2001/XMLSchema#string">occurs in</rdfs:label>
    </owl:ObjectProperty>
    


    <!-- http://purl.obolibrary.org/obo/BSPO_0000120 -->

    <owl:ObjectProperty rdf:about="http://purl.obolibrary.org/obo/BSPO_0000120"/>
    


    <!-- http://purl.obolibrary.org/obo/BSPO_0000121 -->

    <owl:ObjectProperty rdf:about="http://purl.obolibrary.org/obo/BSPO_0000121"/>
    


    <!-- http://purl.obolibrary.org/obo/RO_0000052 -->

    <owl:ObjectProperty rdf:about="http://purl.obolibrary.org/obo/RO_0000052">
        <rdfs:subPropertyOf rdf:resource="http://purl.obolibrary.org/obo/RO_0002314"/>
        <oboInOwl:hasDbXref rdf:datatype="http://www.w3.org/2001/XMLSchema#string">RO:0000052</oboInOwl:hasDbXref>
        <oboInOwl:id rdf:datatype="http://www.w3.org/2001/XMLSchema#string">inheres_in</oboInOwl:id>
        <oboInOwl:shorthand rdf:datatype="http://www.w3.org/2001/XMLSchema#string">inheres_in</oboInOwl:shorthand>
        <rdfs:label rdf:datatype="http://www.w3.org/2001/XMLSchema#string">inheres in</rdfs:label>
    </owl:ObjectProperty>
    


    <!-- http://purl.obolibrary.org/obo/RO_0000057 -->

    <owl:ObjectProperty rdf:about="http://purl.obolibrary.org/obo/RO_0000057">
        <oboInOwl:hasDbXref rdf:datatype="http://www.w3.org/2001/XMLSchema#string">RO:0000057</oboInOwl:hasDbXref>
        <oboInOwl:id rdf:datatype="http://www.w3.org/2001/XMLSchema#string">has_participant</oboInOwl:id>
        <oboInOwl:shorthand rdf:datatype="http://www.w3.org/2001/XMLSchema#string">has_participant</oboInOwl:shorthand>
        <rdfs:label rdf:datatype="http://www.w3.org/2001/XMLSchema#string">has participant</rdfs:label>
    </owl:ObjectProperty>
    


    <!-- http://purl.obolibrary.org/obo/RO_0002314 -->

    <owl:ObjectProperty rdf:about="http://purl.obolibrary.org/obo/RO_0002314">
        <owl:propertyChainAxiom rdf:parseType="Collection">
            <rdf:Description rdf:about="http://purl.obolibrary.org/obo/RO_0000052"/>
            <rdf:Description rdf:about="http://purl.obolibrary.org/obo/BFO_0000050"/>
        </owl:propertyChainAxiom>
        <oboInOwl:hasDbXref rdf:datatype="http://www.w3.org/2001/XMLSchema#string">RO:0002314</oboInOwl:hasDbXref>
        <oboInOwl:id rdf:datatype="http://www.w3.org/2001/XMLSchema#string">inheres_in_part_of</oboInOwl:id>
        <oboInOwl:shorthand rdf:datatype="http://www.w3.org/2001/XMLSchema#string">inheres_in_part_of</oboInOwl:shorthand>
        <rdfs:label rdf:datatype="http://www.w3.org/2001/XMLSchema#string">inheres in part of</rdfs:label>
    </owl:ObjectProperty>
    


    <!-- http://purl.obolibrary.org/obo/RO_0002503 -->

    <owl:ObjectProperty rdf:about="http://purl.obolibrary.org/obo/RO_0002503">
        <oboInOwl:hasDbXref rdf:datatype="http://www.w3.org/2001/XMLSchema#string">RO:0002503</oboInOwl:hasDbXref>
        <oboInOwl:id rdf:datatype="http://www.w3.org/2001/XMLSchema#string">towards</oboInOwl:id>
        <oboInOwl:shorthand rdf:datatype="http://www.w3.org/2001/XMLSchema#string">towards</oboInOwl:shorthand>
        <rdfs:label rdf:datatype="http://www.w3.org/2001/XMLSchema#string">towards</rdfs:label>
    </owl:ObjectProperty>
    


    <!-- http://purl.obolibrary.org/obo/RO_0002573 -->

    <owl:ObjectProperty rdf:about="http://purl.obolibrary.org/obo/RO_0002573">
        <oboInOwl:hasDbXref rdf:datatype="http://www.w3.org/2001/XMLSchema#string">RO:0002180</oboInOwl:hasDbXref>
        <oboInOwl:id rdf:datatype="http://www.w3.org/2001/XMLSchema#string">qualifier</oboInOwl:id>
        <oboInOwl:shorthand rdf:datatype="http://www.w3.org/2001/XMLSchema#string">qualifier</oboInOwl:shorthand>
        <rdfs:comment rdf:datatype="http://www.w3.org/2001/XMLSchema#string">placeholder relation to indicate normality/abnormality.</rdfs:comment>
        <rdfs:label rdf:datatype="http://www.w3.org/2001/XMLSchema#string">has modifier</rdfs:label>
    </owl:ObjectProperty>
    


    <!-- http://purl.obolibrary.org/obo/hp.owl#has_severity -->

    <owl:ObjectProperty rdf:about="http://purl.obolibrary.org/obo/hp.owl#has_severity">
        <rdfs:subPropertyOf rdf:resource="http://www.w3.org/2002/07/owl#topObjectProperty"/>
        <rdfs:range rdf:resource="http://purl.obolibrary.org/obo/HP_0012824"/>
    </owl:ObjectProperty>
    


    <!-- http://purl.obolibrary.org/obo/hp/hp-logical-definitions-subq#adjacent_to -->

    <owl:ObjectProperty rdf:about="http://purl.obolibrary.org/obo/hp/hp-logical-definitions-subq#adjacent_to">
        <oboInOwl:id rdf:datatype="http://www.w3.org/2001/XMLSchema#string">adjacent_to</oboInOwl:id>
        <rdfs:label rdf:datatype="http://www.w3.org/2001/XMLSchema#string">adjacent_to</rdfs:label>
    </owl:ObjectProperty>
    


    <!-- http://purl.obolibrary.org/obo/hp/hp-logical-definitions-subq#contained_in -->

    <owl:ObjectProperty rdf:about="http://purl.obolibrary.org/obo/hp/hp-logical-definitions-subq#contained_in">
        <oboInOwl:id rdf:datatype="http://www.w3.org/2001/XMLSchema#string">contained_in</oboInOwl:id>
        <rdfs:label rdf:datatype="http://www.w3.org/2001/XMLSchema#string">contained in</rdfs:label>
    </owl:ObjectProperty>
    


    <!-- http://purl.obolibrary.org/obo/hp/hp-logical-definitions-subq#during -->

    <owl:ObjectProperty rdf:about="http://purl.obolibrary.org/obo/hp/hp-logical-definitions-subq#during">
        <oboInOwl:id rdf:datatype="http://www.w3.org/2001/XMLSchema#string">during</oboInOwl:id>
        <rdfs:label rdf:datatype="http://www.w3.org/2001/XMLSchema#string">during</rdfs:label>
    </owl:ObjectProperty>
    


    <!-- http://purl.obolibrary.org/obo/hp/hp-logical-definitions-subq#results_in -->

    <owl:ObjectProperty rdf:about="http://purl.obolibrary.org/obo/hp/hp-logical-definitions-subq#results_in">
        <oboInOwl:id rdf:datatype="http://www.w3.org/2001/XMLSchema#string">results_in</oboInOwl:id>
        <rdfs:label rdf:datatype="http://www.w3.org/2001/XMLSchema#string">results in</rdfs:label>
    </owl:ObjectProperty>
    


    <!-- 
    ///////////////////////////////////////////////////////////////////////////////////////
    //
    // Classes
    //
    ///////////////////////////////////////////////////////////////////////////////////////
     -->

    


    <!-- http://purl.obolibrary.org/obo/HP_0000001 -->

    <owl:Class rdf:about="http://purl.obolibrary.org/obo/HP_0000001">
        <oboInOwl:hasDbXref rdf:datatype="http://www.w3.org/2001/XMLSchema#string">UMLS:C0444868</oboInOwl:hasDbXref>
        <oboInOwl:hasOBONamespace rdf:datatype="http://www.w3.org/2001/XMLSchema#string">human_phenotype</oboInOwl:hasOBONamespace>
        <oboInOwl:id rdf:datatype="http://www.w3.org/2001/XMLSchema#string">HP:0000001</oboInOwl:id>
        <rdfs:comment rdf:datatype="http://www.w3.org/2001/XMLSchema#string">Root of all terms in the Human Phenotype Ontology.</rdfs:comment>
        <rdfs:label rdf:datatype="http://www.w3.org/2001/XMLSchema#string">All</rdfs:label>
    </owl:Class>
    


    <!-- http://purl.obolibrary.org/obo/HP_0000118 -->

    <owl:Class rdf:about="http://purl.obolibrary.org/obo/HP_0000118">
        <rdfs:subClassOf rdf:resource="http://purl.obolibrary.org/obo/HP_0000001"/>
        <obo:IAO_0000115 rdf:datatype="http://www.w3.org/2001/XMLSchema#string">A phenotypic abnormality.</obo:IAO_0000115>
        <oboInOwl:hasDbXref rdf:datatype="http://www.w3.org/2001/XMLSchema#string">UMLS:C4021819</oboInOwl:hasDbXref>
        <oboInOwl:hasExactSynonym rdf:datatype="http://www.w3.org/2001/XMLSchema#string">Organ abnormality</oboInOwl:hasExactSynonym>
        <oboInOwl:hasOBONamespace rdf:datatype="http://www.w3.org/2001/XMLSchema#string">human_phenotype</oboInOwl:hasOBONamespace>
        <oboInOwl:id rdf:datatype="http://www.w3.org/2001/XMLSchema#string">HP:0000118</oboInOwl:id>
        <rdfs:comment rdf:datatype="http://www.w3.org/2001/XMLSchema#string">This is the root of the phenotypic abnormality subontology of the HPO.</rdfs:comment>
        <rdfs:label rdf:datatype="http://www.w3.org/2001/XMLSchema#string">Phenotypic abnormality</rdfs:label>
    </owl:Class>
    <owl:Axiom>
        <owl:annotatedSource rdf:resource="http://purl.obolibrary.org/obo/HP_0000118"/>
        <owl:annotatedProperty rdf:resource="http://purl.obolibrary.org/obo/IAO_0000115"/>
        <owl:annotatedTarget rdf:datatype="http://www.w3.org/2001/XMLSchema#string">A phenotypic abnormality.</owl:annotatedTarget>
        <oboInOwl:hasDbXref rdf:datatype="http://www.w3.org/2001/XMLSchema#string">HPO:probinson</oboInOwl:hasDbXref>
    </owl:Axiom>
    


    <!-- http://purl.obolibrary.org/obo/HP_0000478 -->

    <owl:Class rdf:about="http://purl.obolibrary.org/obo/HP_0000478">
        <rdfs:subClassOf rdf:resource="http://purl.obolibrary.org/obo/HP_0000118"/>
        <obo:IAO_0000115 rdf:datatype="http://www.w3.org/2001/XMLSchema#string">Any abnormality of the eye, including location, spacing, and intraocular abnormalities.</obo:IAO_0000115>
        <oboInOwl:hasDbXref rdf:datatype="http://www.w3.org/2001/XMLSchema#string">MSH:D005124</oboInOwl:hasDbXref>
        <oboInOwl:hasDbXref rdf:datatype="http://www.w3.org/2001/XMLSchema#string">MSH:D005128</oboInOwl:hasDbXref>
        <oboInOwl:hasDbXref rdf:datatype="http://www.w3.org/2001/XMLSchema#string">SNOMEDCT_US:19416009</oboInOwl:hasDbXref>
        <oboInOwl:hasDbXref rdf:datatype="http://www.w3.org/2001/XMLSchema#string">SNOMEDCT_US:371405004</oboInOwl:hasDbXref>
        <oboInOwl:hasDbXref rdf:datatype="http://www.w3.org/2001/XMLSchema#string">SNOMEDCT_US:371409005</oboInOwl:hasDbXref>
        <oboInOwl:hasDbXref rdf:datatype="http://www.w3.org/2001/XMLSchema#string">UMLS:C0015393</oboInOwl:hasDbXref>
        <oboInOwl:hasDbXref rdf:datatype="http://www.w3.org/2001/XMLSchema#string">UMLS:C0015397</oboInOwl:hasDbXref>
        <oboInOwl:hasExactSynonym>Abnormal eye</oboInOwl:hasExactSynonym>
        <oboInOwl:hasExactSynonym rdf:datatype="http://www.w3.org/2001/XMLSchema#string">Abnormality of the eye</oboInOwl:hasExactSynonym>
        <oboInOwl:hasOBONamespace rdf:datatype="http://www.w3.org/2001/XMLSchema#string">human_phenotype</oboInOwl:hasOBONamespace>
        <oboInOwl:hasRelatedSynonym rdf:datatype="http://www.w3.org/2001/XMLSchema#string">Eye disease</oboInOwl:hasRelatedSynonym>
        <oboInOwl:id rdf:datatype="http://www.w3.org/2001/XMLSchema#string">HP:0000478</oboInOwl:id>
        <oboInOwl:inSubset rdf:resource="http://purl.obolibrary.org/obo/hp#hposlim_core"/>
        <rdfs:label rdf:datatype="http://www.w3.org/2001/XMLSchema#string">Abnormality of the eye</rdfs:label>
    </owl:Class>
    <owl:Axiom>
        <owl:annotatedSource rdf:resource="http://purl.obolibrary.org/obo/HP_0000478"/>
        <owl:annotatedProperty rdf:resource="http://purl.obolibrary.org/obo/IAO_0000115"/>
        <owl:annotatedTarget rdf:datatype="http://www.w3.org/2001/XMLSchema#string">Any abnormality of the eye, including location, spacing, and intraocular abnormalities.</owl:annotatedTarget>
        <oboInOwl:hasDbXref rdf:datatype="http://www.w3.org/2001/XMLSchema#string">HPO:probinson</oboInOwl:hasDbXref>
    </owl:Axiom>
    <owl:Axiom>
        <owl:annotatedSource rdf:resource="http://purl.obolibrary.org/obo/HP_0000478"/>
        <owl:annotatedProperty rdf:resource="http://www.geneontology.org/formats/oboInOwl#hasExactSynonym"/>
        <owl:annotatedTarget>Abnormal eye</owl:annotatedTarget>
        <oboInOwl:hasDbXref>HPO:skoehler</oboInOwl:hasDbXref>
        <oboInOwl:hasSynonymType rdf:resource="http://purl.obolibrary.org/obo/hp.owl#layperson"/>
    </owl:Axiom>
    <owl:Axiom>
        <owl:annotatedSource rdf:resource="http://purl.obolibrary.org/obo/HP_0000478"/>
        <owl:annotatedProperty rdf:resource="http://www.geneontology.org/formats/oboInOwl#hasExactSynonym"/>
        <owl:annotatedTarget rdf:datatype="http://www.w3.org/2001/XMLSchema#string">Abnormality of the eye</owl:annotatedTarget>
        <oboInOwl:hasSynonymType rdf:resource="http://purl.obolibrary.org/obo/hp.owl#layperson"/>
    </owl:Axiom>
    <owl:Axiom>
        <owl:annotatedSource rdf:resource="http://purl.obolibrary.org/obo/HP_0000478"/>
        <owl:annotatedProperty rdf:resource="http://www.geneontology.org/formats/oboInOwl#hasRelatedSynonym"/>
        <owl:annotatedTarget rdf:datatype="http://www.w3.org/2001/XMLSchema#string">Eye disease</owl:annotatedTarget>
        <oboInOwl:hasSynonymType rdf:resource="http://purl.obolibrary.org/obo/hp.owl#layperson"/>
    </owl:Axiom>
    


    <!-- http://purl.obolibrary.org/obo/HP_0000496 -->

    <owl:Class rdf:about="http://purl.obolibrary.org/obo/HP_0000496">
        <rdfs:subClassOf rdf:resource="http://purl.obolibrary.org/obo/HP_0012373"/>
        <obo:IAO_0000115 rdf:datatype="http://www.w3.org/2001/XMLSchema#string">An abnormality in voluntary or involuntary eye movements or their control.</obo:IAO_0000115>
        <oboInOwl:hasAlternativeId rdf:datatype="http://www.w3.org/2001/XMLSchema#string">HP:0006860</oboInOwl:hasAlternativeId>
        <oboInOwl:hasDbXref rdf:datatype="http://www.w3.org/2001/XMLSchema#string">SNOMEDCT_US:103252009</oboInOwl:hasDbXref>
        <oboInOwl:hasDbXref rdf:datatype="http://www.w3.org/2001/XMLSchema#string">UMLS:C0497202</oboInOwl:hasDbXref>
        <oboInOwl:hasExactSynonym rdf:datatype="http://www.w3.org/2001/XMLSchema#string">Abnormal extraocular movement</oboInOwl:hasExactSynonym>
        <oboInOwl:hasExactSynonym rdf:datatype="http://www.w3.org/2001/XMLSchema#string">Abnormal extraocular movements</oboInOwl:hasExactSynonym>
        <oboInOwl:hasExactSynonym rdf:datatype="http://www.w3.org/2001/XMLSchema#string">Abnormal eye motility</oboInOwl:hasExactSynonym>
        <oboInOwl:hasExactSynonym rdf:datatype="http://www.w3.org/2001/XMLSchema#string">Abnormal eye movement</oboInOwl:hasExactSynonym>
        <oboInOwl:hasExactSynonym rdf:datatype="http://www.w3.org/2001/XMLSchema#string">Abnormal eye movements</oboInOwl:hasExactSynonym>
        <oboInOwl:hasExactSynonym>Abnormal motility of the globe of the eye</oboInOwl:hasExactSynonym>
        <oboInOwl:hasExactSynonym>Abnormal movement of the globe of the eye</oboInOwl:hasExactSynonym>
        <oboInOwl:hasExactSynonym rdf:datatype="http://www.w3.org/2001/XMLSchema#string">Abnormal ocular movements</oboInOwl:hasExactSynonym>
        <oboInOwl:hasExactSynonym rdf:datatype="http://www.w3.org/2001/XMLSchema#string">Abnormality of eye movement</oboInOwl:hasExactSynonym>
        <oboInOwl:hasExactSynonym rdf:datatype="http://www.w3.org/2001/XMLSchema#string">Eye movement abnormalities</oboInOwl:hasExactSynonym>
        <oboInOwl:hasExactSynonym>Eye movement issue</oboInOwl:hasExactSynonym>
        <oboInOwl:hasExactSynonym rdf:datatype="http://www.w3.org/2001/XMLSchema#string">Ocular movement abnormalities</oboInOwl:hasExactSynonym>
        <oboInOwl:hasExactSynonym rdf:datatype="http://www.w3.org/2001/XMLSchema#string">Oculomotor abnormalities</oboInOwl:hasExactSynonym>
        <oboInOwl:hasOBONamespace rdf:datatype="http://www.w3.org/2001/XMLSchema#string">human_phenotype</oboInOwl:hasOBONamespace>
        <oboInOwl:id rdf:datatype="http://www.w3.org/2001/XMLSchema#string">HP:0000496</oboInOwl:id>
        <oboInOwl:inSubset rdf:resource="http://purl.obolibrary.org/obo/hp#hposlim_core"/>
        <rdfs:label rdf:datatype="http://www.w3.org/2001/XMLSchema#string">Abnormality of eye movement</rdfs:label>
    </owl:Class>
    <owl:Axiom>
        <owl:annotatedSource rdf:resource="http://purl.obolibrary.org/obo/HP_0000496"/>
        <owl:annotatedProperty rdf:resource="http://www.geneontology.org/formats/oboInOwl#hasExactSynonym"/>
        <owl:annotatedTarget rdf:datatype="http://www.w3.org/2001/XMLSchema#string">Abnormal eye movements</owl:annotatedTarget>
        <oboInOwl:hasSynonymType rdf:resource="http://purl.obolibrary.org/obo/hp.owl#layperson"/>
    </owl:Axiom>
    <owl:Axiom>
        <owl:annotatedSource rdf:resource="http://purl.obolibrary.org/obo/HP_0000496"/>
        <owl:annotatedProperty rdf:resource="http://www.geneontology.org/formats/oboInOwl#hasExactSynonym"/>
        <owl:annotatedTarget>Abnormal motility of the globe of the eye</owl:annotatedTarget>
        <oboInOwl:hasDbXref>orcid.org/0000-0001-5208-3432</oboInOwl:hasDbXref>
        <oboInOwl:hasDbXref>orcid.org/0000-0001-5889-4463</oboInOwl:hasDbXref>
    </owl:Axiom>
    <owl:Axiom>
        <owl:annotatedSource rdf:resource="http://purl.obolibrary.org/obo/HP_0000496"/>
        <owl:annotatedProperty rdf:resource="http://www.geneontology.org/formats/oboInOwl#hasExactSynonym"/>
        <owl:annotatedTarget>Abnormal movement of the globe of the eye</owl:annotatedTarget>
        <oboInOwl:hasDbXref>orcid.org/0000-0001-5208-3432</oboInOwl:hasDbXref>
        <oboInOwl:hasDbXref>orcid.org/0000-0001-5889-4463</oboInOwl:hasDbXref>
    </owl:Axiom>
    <owl:Axiom>
        <owl:annotatedSource rdf:resource="http://purl.obolibrary.org/obo/HP_0000496"/>
        <owl:annotatedProperty rdf:resource="http://www.geneontology.org/formats/oboInOwl#hasExactSynonym"/>
        <owl:annotatedTarget rdf:datatype="http://www.w3.org/2001/XMLSchema#string">Abnormality of eye movement</owl:annotatedTarget>
        <oboInOwl:hasSynonymType rdf:resource="http://purl.obolibrary.org/obo/hp.owl#layperson"/>
    </owl:Axiom>
    <owl:Axiom>
        <owl:annotatedSource rdf:resource="http://purl.obolibrary.org/obo/HP_0000496"/>
        <owl:annotatedProperty rdf:resource="http://www.geneontology.org/formats/oboInOwl#hasExactSynonym"/>
        <owl:annotatedTarget rdf:datatype="http://www.w3.org/2001/XMLSchema#string">Eye movement abnormalities</owl:annotatedTarget>
        <oboInOwl:hasSynonymType rdf:resource="http://purl.obolibrary.org/obo/hp.owl#layperson"/>
    </owl:Axiom>
    <owl:Axiom>
        <owl:annotatedSource rdf:resource="http://purl.obolibrary.org/obo/HP_0000496"/>
        <owl:annotatedProperty rdf:resource="http://www.geneontology.org/formats/oboInOwl#hasExactSynonym"/>
        <owl:annotatedTarget>Eye movement issue</owl:annotatedTarget>
        <oboInOwl:hasSynonymType rdf:resource="http://purl.obolibrary.org/obo/hp.owl#layperson"/>
    </owl:Axiom>
    <owl:Axiom>
        <owl:annotatedSource rdf:resource="http://purl.obolibrary.org/obo/HP_0000496"/>
        <owl:annotatedProperty rdf:resource="http://purl.obolibrary.org/obo/IAO_0000115"/>
        <owl:annotatedTarget rdf:datatype="http://www.w3.org/2001/XMLSchema#string">An abnormality in voluntary or involuntary eye movements or their control.</owl:annotatedTarget>
        <oboInOwl:hasDbXref rdf:datatype="http://www.w3.org/2001/XMLSchema#string">HPO:probinson</oboInOwl:hasDbXref>
    </owl:Axiom>
    <owl:Axiom>
        <owl:annotatedSource rdf:resource="http://purl.obolibrary.org/obo/HP_0000496"/>
        <owl:annotatedProperty rdf:resource="http://www.geneontology.org/formats/oboInOwl#hasExactSynonym"/>
        <owl:annotatedTarget rdf:datatype="http://www.w3.org/2001/XMLSchema#string">Abnormal eye movement</owl:annotatedTarget>
        <oboInOwl:hasSynonymType rdf:resource="http://purl.obolibrary.org/obo/hp.owl#layperson"/>
    </owl:Axiom>
    


    <!-- http://purl.obolibrary.org/obo/HP_0000639 -->

    <owl:Class rdf:about="http://purl.obolibrary.org/obo/HP_0000639">
        <rdfs:subClassOf rdf:resource="http://purl.obolibrary.org/obo/HP_0012547"/>
        <obo:IAO_0000115 rdf:datatype="http://www.w3.org/2001/XMLSchema#string">Rhythmic, involuntary oscillations of one or both eyes related to abnormality in fixation, conjugate gaze, or vestibular mechanisms.</obo:IAO_0000115>
        <oboInOwl:hasDbXref rdf:datatype="http://www.w3.org/2001/XMLSchema#string">MSH:D009759</oboInOwl:hasDbXref>
        <oboInOwl:hasDbXref rdf:datatype="http://www.w3.org/2001/XMLSchema#string">SNOMEDCT_US:563001</oboInOwl:hasDbXref>
        <oboInOwl:hasDbXref rdf:datatype="http://www.w3.org/2001/XMLSchema#string">UMLS:C0028738</oboInOwl:hasDbXref>
        <oboInOwl:hasOBONamespace rdf:datatype="http://www.w3.org/2001/XMLSchema#string">human_phenotype</oboInOwl:hasOBONamespace>
        <oboInOwl:id rdf:datatype="http://www.w3.org/2001/XMLSchema#string">HP:0000639</oboInOwl:id>
        <oboInOwl:inSubset rdf:resource="http://purl.obolibrary.org/obo/hp#hposlim_core"/>
        <rdfs:label rdf:datatype="http://www.w3.org/2001/XMLSchema#string">Nystagmus</rdfs:label>
    </owl:Class>
    <owl:Axiom>
        <owl:annotatedSource rdf:resource="http://purl.obolibrary.org/obo/HP_0000639"/>
        <owl:annotatedProperty rdf:resource="http://purl.obolibrary.org/obo/IAO_0000115"/>
        <owl:annotatedTarget rdf:datatype="http://www.w3.org/2001/XMLSchema#string">Rhythmic, involuntary oscillations of one or both eyes related to abnormality in fixation, conjugate gaze, or vestibular mechanisms.</owl:annotatedTarget>
        <oboInOwl:hasDbXref rdf:datatype="http://www.w3.org/2001/XMLSchema#string">HPO:curators</oboInOwl:hasDbXref>
    </owl:Axiom>
    


    <!-- http://purl.obolibrary.org/obo/HP_0000707 -->

    <owl:Class rdf:about="http://purl.obolibrary.org/obo/HP_0000707">
        <rdfs:subClassOf rdf:resource="http://purl.obolibrary.org/obo/HP_0000118"/>
        <obo:IAO_0000115 rdf:datatype="http://www.w3.org/2001/XMLSchema#string">An abnormality of the nervous system.</obo:IAO_0000115>
        <oboInOwl:hasAlternativeId rdf:datatype="http://www.w3.org/2001/XMLSchema#string">HP:0001333</oboInOwl:hasAlternativeId>
        <oboInOwl:hasAlternativeId rdf:datatype="http://www.w3.org/2001/XMLSchema#string">HP:0006987</oboInOwl:hasAlternativeId>
        <oboInOwl:hasBroadSynonym>Brain and/or spinal cord issue</oboInOwl:hasBroadSynonym>
        <oboInOwl:hasDbXref rdf:datatype="http://www.w3.org/2001/XMLSchema#string">MSH:D009421</oboInOwl:hasDbXref>
        <oboInOwl:hasDbXref rdf:datatype="http://www.w3.org/2001/XMLSchema#string">SNOMEDCT_US:88425004</oboInOwl:hasDbXref>
        <oboInOwl:hasDbXref rdf:datatype="http://www.w3.org/2001/XMLSchema#string">UMLS:C0497552</oboInOwl:hasDbXref>
        <oboInOwl:hasExactSynonym rdf:datatype="http://www.w3.org/2001/XMLSchema#string">Abnormality of the nervous system</oboInOwl:hasExactSynonym>
        <oboInOwl:hasExactSynonym rdf:datatype="http://www.w3.org/2001/XMLSchema#string">Neurologic abnormalities</oboInOwl:hasExactSynonym>
        <oboInOwl:hasExactSynonym rdf:datatype="http://www.w3.org/2001/XMLSchema#string">Neurological abnormality</oboInOwl:hasExactSynonym>
        <oboInOwl:hasOBONamespace rdf:datatype="http://www.w3.org/2001/XMLSchema#string">human_phenotype</oboInOwl:hasOBONamespace>
        <oboInOwl:id rdf:datatype="http://www.w3.org/2001/XMLSchema#string">HP:0000707</oboInOwl:id>
        <rdfs:comment rdf:datatype="http://www.w3.org/2001/XMLSchema#string">The nervous system comprises the neuraxis (brain, spinal cord, and ventricles), the autonomic nervous system, the enteric nervous system, and the peripheral nervous system.</rdfs:comment>
        <rdfs:label rdf:datatype="http://www.w3.org/2001/XMLSchema#string">Abnormality of the nervous system</rdfs:label>
    </owl:Class>
    <owl:Axiom>
        <owl:annotatedSource rdf:resource="http://purl.obolibrary.org/obo/HP_0000707"/>
        <owl:annotatedProperty rdf:resource="http://purl.obolibrary.org/obo/IAO_0000115"/>
        <owl:annotatedTarget rdf:datatype="http://www.w3.org/2001/XMLSchema#string">An abnormality of the nervous system.</owl:annotatedTarget>
        <oboInOwl:hasDbXref rdf:datatype="http://www.w3.org/2001/XMLSchema#string">HPO:probinson</oboInOwl:hasDbXref>
    </owl:Axiom>
    <owl:Axiom>
        <owl:annotatedSource rdf:resource="http://purl.obolibrary.org/obo/HP_0000707"/>
        <owl:annotatedProperty rdf:resource="http://www.geneontology.org/formats/oboInOwl#hasBroadSynonym"/>
        <owl:annotatedTarget>Brain and/or spinal cord issue</owl:annotatedTarget>
        <oboInOwl:hasSynonymType rdf:resource="http://purl.obolibrary.org/obo/hp.owl#layperson"/>
    </owl:Axiom>
    <owl:Axiom>
        <owl:annotatedSource rdf:resource="http://purl.obolibrary.org/obo/HP_0000707"/>
        <owl:annotatedProperty rdf:resource="http://www.geneontology.org/formats/oboInOwl#hasExactSynonym"/>
        <owl:annotatedTarget rdf:datatype="http://www.w3.org/2001/XMLSchema#string">Abnormality of the nervous system</owl:annotatedTarget>
        <oboInOwl:hasSynonymType rdf:resource="http://purl.obolibrary.org/obo/hp.owl#layperson"/>
    </owl:Axiom>
    <owl:Axiom>
        <owl:annotatedSource rdf:resource="http://purl.obolibrary.org/obo/HP_0000707"/>
        <owl:annotatedProperty rdf:resource="http://www.geneontology.org/formats/oboInOwl#hasExactSynonym"/>
        <owl:annotatedTarget rdf:datatype="http://www.w3.org/2001/XMLSchema#string">Neurologic abnormalities</owl:annotatedTarget>
        <oboInOwl:hasSynonymType rdf:resource="http://purl.obolibrary.org/obo/hp.owl#layperson"/>
    </owl:Axiom>
    <owl:Axiom>
        <owl:annotatedSource rdf:resource="http://purl.obolibrary.org/obo/HP_0000707"/>
        <owl:annotatedProperty rdf:resource="http://www.geneontology.org/formats/oboInOwl#hasExactSynonym"/>
        <owl:annotatedTarget rdf:datatype="http://www.w3.org/2001/XMLSchema#string">Neurological abnormality</owl:annotatedTarget>
        <oboInOwl:hasSynonymType rdf:resource="http://purl.obolibrary.org/obo/hp.owl#layperson"/>
    </owl:Axiom>
    


    <!-- http://purl.obolibrary.org/obo/HP_0001251 -->

    <owl:Class rdf:about="http://purl.obolibrary.org/obo/HP_0001251">
        <rdfs:subClassOf rdf:resource="http://purl.obolibrary.org/obo/HP_0001317"/>
        <rdfs:subClassOf rdf:resource="http://purl.obolibrary.org/obo/HP_0011443"/>
        <obo:IAO_0000115 rdf:datatype="http://www.w3.org/2001/XMLSchema#string">Cerebellar ataxia refers to ataxia due to dysfunction of the cerebellum. This causes a variety of elementary neurological deficits including asynergy (lack of coordination between muscles, limbs and joints), dysmetria (lack of ability to judge distances that can lead to under- oder overshoot in grasping movements), and dysdiadochokinesia (inability to perform rapid movements requiring antagonizing muscle groups to be switched on and off repeatedly).</obo:IAO_0000115>
        <oboInOwl:hasAlternativeId rdf:datatype="http://www.w3.org/2001/XMLSchema#string">HP:0001253</oboInOwl:hasAlternativeId>
        <oboInOwl:hasAlternativeId rdf:datatype="http://www.w3.org/2001/XMLSchema#string">HP:0002513</oboInOwl:hasAlternativeId>
        <oboInOwl:hasAlternativeId rdf:datatype="http://www.w3.org/2001/XMLSchema#string">HP:0007050</oboInOwl:hasAlternativeId>
        <oboInOwl:hasAlternativeId rdf:datatype="http://www.w3.org/2001/XMLSchema#string">HP:0007157</oboInOwl:hasAlternativeId>
        <oboInOwl:hasDbXref rdf:datatype="http://www.w3.org/2001/XMLSchema#string">MSH:D002524</oboInOwl:hasDbXref>
        <oboInOwl:hasDbXref rdf:datatype="http://www.w3.org/2001/XMLSchema#string">SNOMEDCT_US:85102008</oboInOwl:hasDbXref>
        <oboInOwl:hasDbXref rdf:datatype="http://www.w3.org/2001/XMLSchema#string">UMLS:C0007758</oboInOwl:hasDbXref>
        <oboInOwl:hasExactSynonym rdf:datatype="http://www.w3.org/2001/XMLSchema#string">Cerebellar ataxia</oboInOwl:hasExactSynonym>
        <oboInOwl:hasOBONamespace rdf:datatype="http://www.w3.org/2001/XMLSchema#string">human_phenotype</oboInOwl:hasOBONamespace>
        <oboInOwl:id rdf:datatype="http://www.w3.org/2001/XMLSchema#string">HP:0001251</oboInOwl:id>
        <rdfs:comment rdf:datatype="http://www.w3.org/2001/XMLSchema#string">Ataxia can be differentiated into dyssynergy, asynergy, dysmetria (hypometria, hypermetria), dysdiadochokinesis, gait ataxia, truncal ataxia, limb ataxia, and dysarthria). Note: This term does not include sensory ataxia.</rdfs:comment>
        <rdfs:label rdf:datatype="http://www.w3.org/2001/XMLSchema#string">Ataxia</rdfs:label>
    </owl:Class>
    <owl:Axiom>
        <owl:annotatedSource rdf:resource="http://purl.obolibrary.org/obo/HP_0001251"/>
        <owl:annotatedProperty rdf:resource="http://purl.obolibrary.org/obo/IAO_0000115"/>
        <owl:annotatedTarget rdf:datatype="http://www.w3.org/2001/XMLSchema#string">Cerebellar ataxia refers to ataxia due to dysfunction of the cerebellum. This causes a variety of elementary neurological deficits including asynergy (lack of coordination between muscles, limbs and joints), dysmetria (lack of ability to judge distances that can lead to under- oder overshoot in grasping movements), and dysdiadochokinesia (inability to perform rapid movements requiring antagonizing muscle groups to be switched on and off repeatedly).</owl:annotatedTarget>
        <oboInOwl:hasDbXref rdf:datatype="http://www.w3.org/2001/XMLSchema#string">HPO:probinson</oboInOwl:hasDbXref>
    </owl:Axiom>
    


    <!-- http://purl.obolibrary.org/obo/HP_0001252 -->

    <owl:Class rdf:about="http://purl.obolibrary.org/obo/HP_0001252">
        <rdfs:subClassOf rdf:resource="http://purl.obolibrary.org/obo/HP_0003808"/>
        <obo:IAO_0000115 rdf:datatype="http://www.w3.org/2001/XMLSchema#string">Muscular hypotonia is an abnormally low muscle tone (the amount of tension or resistance to movement in a muscle), often involving reduced muscle strength. Hypotonia is characterized by a diminished resistance to passive stretching.</obo:IAO_0000115>
        <oboInOwl:hasAlternativeId rdf:datatype="http://www.w3.org/2001/XMLSchema#string">HP:0001318</oboInOwl:hasAlternativeId>
        <oboInOwl:hasDbXref rdf:datatype="http://www.w3.org/2001/XMLSchema#string">MSH:D009123</oboInOwl:hasDbXref>
        <oboInOwl:hasDbXref rdf:datatype="http://www.w3.org/2001/XMLSchema#string">SNOMEDCT_US:398151007</oboInOwl:hasDbXref>
        <oboInOwl:hasDbXref rdf:datatype="http://www.w3.org/2001/XMLSchema#string">SNOMEDCT_US:398152000</oboInOwl:hasDbXref>
        <oboInOwl:hasDbXref rdf:datatype="http://www.w3.org/2001/XMLSchema#string">UMLS:C0026827</oboInOwl:hasDbXref>
        <oboInOwl:hasExactSynonym rdf:datatype="http://www.w3.org/2001/XMLSchema#string">Muscle hypotonia</oboInOwl:hasExactSynonym>
        <oboInOwl:hasOBONamespace rdf:datatype="http://www.w3.org/2001/XMLSchema#string">human_phenotype</oboInOwl:hasOBONamespace>
        <oboInOwl:id rdf:datatype="http://www.w3.org/2001/XMLSchema#string">HP:0001252</oboInOwl:id>
        <rdfs:label rdf:datatype="http://www.w3.org/2001/XMLSchema#string">Muscular hypotonia</rdfs:label>
    </owl:Class>
    <owl:Axiom>
        <owl:annotatedSource rdf:resource="http://purl.obolibrary.org/obo/HP_0001252"/>
        <owl:annotatedProperty rdf:resource="http://purl.obolibrary.org/obo/IAO_0000115"/>
        <owl:annotatedTarget rdf:datatype="http://www.w3.org/2001/XMLSchema#string">Muscular hypotonia is an abnormally low muscle tone (the amount of tension or resistance to movement in a muscle), often involving reduced muscle strength. Hypotonia is characterized by a diminished resistance to passive stretching.</owl:annotatedTarget>
        <oboInOwl:hasDbXref rdf:datatype="http://www.w3.org/2001/XMLSchema#string">HPO:curators</oboInOwl:hasDbXref>
    </owl:Axiom>
    


    <!-- http://purl.obolibrary.org/obo/HP_0001260 -->

    <owl:Class rdf:about="http://purl.obolibrary.org/obo/HP_0001260">
        <rdfs:subClassOf rdf:resource="http://purl.obolibrary.org/obo/HP_0002167"/>
        <obo:IAO_0000115 rdf:datatype="http://www.w3.org/2001/XMLSchema#string">Dysarthric speech is a general description referring to a neurological speech disorder characterized by poor articulation. Depending on the involved neurological structures, dysarthria may be further classified as spastic, flaccid, ataxic, hyperkinetic and hypokinetic, or mixed.</obo:IAO_0000115>
        <oboInOwl:hasAlternativeId rdf:datatype="http://www.w3.org/2001/XMLSchema#string">HP:0002327</oboInOwl:hasAlternativeId>
        <oboInOwl:hasDbXref rdf:datatype="http://www.w3.org/2001/XMLSchema#string">MSH:D004401</oboInOwl:hasDbXref>
        <oboInOwl:hasDbXref rdf:datatype="http://www.w3.org/2001/XMLSchema#string">SNOMEDCT_US:8011004</oboInOwl:hasDbXref>
        <oboInOwl:hasDbXref rdf:datatype="http://www.w3.org/2001/XMLSchema#string">UMLS:C0013362</oboInOwl:hasDbXref>
        <oboInOwl:hasExactSynonym>Difficulty articulating speech</oboInOwl:hasExactSynonym>
        <oboInOwl:hasExactSynonym rdf:datatype="http://www.w3.org/2001/XMLSchema#string">Dysarthric speech</oboInOwl:hasExactSynonym>
        <oboInOwl:hasOBONamespace rdf:datatype="http://www.w3.org/2001/XMLSchema#string">human_phenotype</oboInOwl:hasOBONamespace>
        <oboInOwl:id rdf:datatype="http://www.w3.org/2001/XMLSchema#string">HP:0001260</oboInOwl:id>
        <rdfs:label rdf:datatype="http://www.w3.org/2001/XMLSchema#string">Dysarthria</rdfs:label>
    </owl:Class>
    <owl:Axiom>
        <owl:annotatedSource rdf:resource="http://purl.obolibrary.org/obo/HP_0001260"/>
        <owl:annotatedProperty rdf:resource="http://purl.obolibrary.org/obo/IAO_0000115"/>
        <owl:annotatedTarget rdf:datatype="http://www.w3.org/2001/XMLSchema#string">Dysarthric speech is a general description referring to a neurological speech disorder characterized by poor articulation. Depending on the involved neurological structures, dysarthria may be further classified as spastic, flaccid, ataxic, hyperkinetic and hypokinetic, or mixed.</owl:annotatedTarget>
        <oboInOwl:hasDbXref rdf:datatype="http://www.w3.org/2001/XMLSchema#string">HPO:curators</oboInOwl:hasDbXref>
    </owl:Axiom>
    <owl:Axiom>
        <owl:annotatedSource rdf:resource="http://purl.obolibrary.org/obo/HP_0001260"/>
        <owl:annotatedProperty rdf:resource="http://www.geneontology.org/formats/oboInOwl#hasExactSynonym"/>
        <owl:annotatedTarget>Difficulty articulating speech</owl:annotatedTarget>
        <oboInOwl:hasSynonymType rdf:resource="http://purl.obolibrary.org/obo/hp.owl#layperson"/>
    </owl:Axiom>
    


    <!-- http://purl.obolibrary.org/obo/HP_0001288 -->

    <owl:Class rdf:about="http://purl.obolibrary.org/obo/HP_0001288">
        <rdfs:subClassOf rdf:resource="http://purl.obolibrary.org/obo/HP_0100022"/>
        <obo:IAO_0000115 rdf:datatype="http://www.w3.org/2001/XMLSchema#string">The term gait disturbance can refer to any disruption of the ability to walk. In general, this can refer to neurological diseases but also fractures or other sources of pain that is triggered upon walking. However, in the current context gait disturbance refers to difficulty walking on the basis of a neurological or muscular disease.</obo:IAO_0000115>
        <oboInOwl:hasAlternativeId rdf:datatype="http://www.w3.org/2001/XMLSchema#string">HP:0006953</oboInOwl:hasAlternativeId>
        <oboInOwl:hasDbXref rdf:datatype="http://www.w3.org/2001/XMLSchema#string">SNOMEDCT_US:22325002</oboInOwl:hasDbXref>
        <oboInOwl:hasDbXref rdf:datatype="http://www.w3.org/2001/XMLSchema#string">UMLS:C0575081</oboInOwl:hasDbXref>
        <oboInOwl:hasExactSynonym rdf:datatype="http://www.w3.org/2001/XMLSchema#string">Abnormal gait</oboInOwl:hasExactSynonym>
        <oboInOwl:hasExactSynonym>Abnormal walk</oboInOwl:hasExactSynonym>
        <oboInOwl:hasExactSynonym rdf:datatype="http://www.w3.org/2001/XMLSchema#string">Gait abnormalities</oboInOwl:hasExactSynonym>
        <oboInOwl:hasExactSynonym rdf:datatype="http://www.w3.org/2001/XMLSchema#string">Gait difficulties</oboInOwl:hasExactSynonym>
        <oboInOwl:hasExactSynonym rdf:datatype="http://www.w3.org/2001/XMLSchema#string">Gait disturbances</oboInOwl:hasExactSynonym>
        <oboInOwl:hasExactSynonym rdf:datatype="http://www.w3.org/2001/XMLSchema#string">Impaired gait</oboInOwl:hasExactSynonym>
        <oboInOwl:hasOBONamespace rdf:datatype="http://www.w3.org/2001/XMLSchema#string">human_phenotype</oboInOwl:hasOBONamespace>
        <oboInOwl:id rdf:datatype="http://www.w3.org/2001/XMLSchema#string">HP:0001288</oboInOwl:id>
        <rdfs:comment rdf:datatype="http://www.w3.org/2001/XMLSchema#string">If possible, this term should not be used for new annotations. Rather, a more specific term should be sought.</rdfs:comment>
        <rdfs:label rdf:datatype="http://www.w3.org/2001/XMLSchema#string">Gait disturbance</rdfs:label>
    </owl:Class>
    <owl:Axiom>
        <owl:annotatedSource rdf:resource="http://purl.obolibrary.org/obo/HP_0001288"/>
        <owl:annotatedProperty rdf:resource="http://purl.obolibrary.org/obo/IAO_0000115"/>
        <owl:annotatedTarget rdf:datatype="http://www.w3.org/2001/XMLSchema#string">The term gait disturbance can refer to any disruption of the ability to walk. In general, this can refer to neurological diseases but also fractures or other sources of pain that is triggered upon walking. However, in the current context gait disturbance refers to difficulty walking on the basis of a neurological or muscular disease.</owl:annotatedTarget>
        <oboInOwl:hasDbXref rdf:datatype="http://www.w3.org/2001/XMLSchema#string">HPO:probinson</oboInOwl:hasDbXref>
    </owl:Axiom>
    <owl:Axiom>
        <owl:annotatedSource rdf:resource="http://purl.obolibrary.org/obo/HP_0001288"/>
        <owl:annotatedProperty rdf:resource="http://www.geneontology.org/formats/oboInOwl#hasExactSynonym"/>
        <owl:annotatedTarget rdf:datatype="http://www.w3.org/2001/XMLSchema#string">Abnormal gait</owl:annotatedTarget>
        <oboInOwl:hasSynonymType rdf:resource="http://purl.obolibrary.org/obo/hp.owl#layperson"/>
    </owl:Axiom>
    <owl:Axiom>
        <owl:annotatedSource rdf:resource="http://purl.obolibrary.org/obo/HP_0001288"/>
        <owl:annotatedProperty rdf:resource="http://www.geneontology.org/formats/oboInOwl#hasExactSynonym"/>
        <owl:annotatedTarget>Abnormal walk</owl:annotatedTarget>
        <oboInOwl:hasDbXref>http://orcid.org/0000-0001-5208-3432</oboInOwl:hasDbXref>
        <oboInOwl:hasSynonymType rdf:resource="http://purl.obolibrary.org/obo/hp.owl#layperson"/>
    </owl:Axiom>
    <owl:Axiom>
        <owl:annotatedSource rdf:resource="http://purl.obolibrary.org/obo/HP_0001288"/>
        <owl:annotatedProperty rdf:resource="http://www.geneontology.org/formats/oboInOwl#hasExactSynonym"/>
        <owl:annotatedTarget rdf:datatype="http://www.w3.org/2001/XMLSchema#string">Impaired gait</owl:annotatedTarget>
        <oboInOwl:hasSynonymType rdf:resource="http://purl.obolibrary.org/obo/hp.owl#layperson"/>
    </owl:Axiom>
    


    <!-- http://purl.obolibrary.org/obo/HP_0001310 -->

    <owl:Class rdf:about="http://purl.obolibrary.org/obo/HP_0001310">
        <rdfs:subClassOf rdf:resource="http://purl.obolibrary.org/obo/HP_0001251"/>
        <obo:IAO_0000115 rdf:datatype="http://www.w3.org/2001/XMLSchema#string">A type of ataxia characterized by the inability to carry out movements with the correct range and motion across the plane of more than one joint related to incorrect estimation of the distances required for targeted movements.</obo:IAO_0000115>
        <oboInOwl:hasDbXref rdf:datatype="http://www.w3.org/2001/XMLSchema#string">MSH:D002524</oboInOwl:hasDbXref>
        <oboInOwl:hasDbXref rdf:datatype="http://www.w3.org/2001/XMLSchema#string">SNOMEDCT_US:32566006</oboInOwl:hasDbXref>
        <oboInOwl:hasDbXref rdf:datatype="http://www.w3.org/2001/XMLSchema#string">UMLS:C0234162</oboInOwl:hasDbXref>
        <oboInOwl:hasOBONamespace rdf:datatype="http://www.w3.org/2001/XMLSchema#string">human_phenotype</oboInOwl:hasOBONamespace>
        <oboInOwl:id rdf:datatype="http://www.w3.org/2001/XMLSchema#string">HP:0001310</oboInOwl:id>
        <rdfs:comment rdf:datatype="http://www.w3.org/2001/XMLSchema#string">Dysmetria can result in moving beyond the target (hypermetria) or failing to reach the target (hypometria) during a voluntary movement.</rdfs:comment>
        <rdfs:label rdf:datatype="http://www.w3.org/2001/XMLSchema#string">Dysmetria</rdfs:label>
    </owl:Class>
    <owl:Axiom>
        <owl:annotatedSource rdf:resource="http://purl.obolibrary.org/obo/HP_0001310"/>
        <owl:annotatedProperty rdf:resource="http://purl.obolibrary.org/obo/IAO_0000115"/>
        <owl:annotatedTarget rdf:datatype="http://www.w3.org/2001/XMLSchema#string">A type of ataxia characterized by the inability to carry out movements with the correct range and motion across the plane of more than one joint related to incorrect estimation of the distances required for targeted movements.</owl:annotatedTarget>
        <oboInOwl:hasDbXref rdf:datatype="http://www.w3.org/2001/XMLSchema#string">HPO:probinson</oboInOwl:hasDbXref>
    </owl:Axiom>
    


    <!-- http://purl.obolibrary.org/obo/HP_0001317 -->

    <owl:Class rdf:about="http://purl.obolibrary.org/obo/HP_0001317">
        <rdfs:subClassOf rdf:resource="http://purl.obolibrary.org/obo/HP_0011283"/>
        <obo:IAO_0000115 rdf:datatype="http://www.w3.org/2001/XMLSchema#string">An abnormality of the cerebellum.</obo:IAO_0000115>
        <oboInOwl:hasDbXref rdf:datatype="http://www.w3.org/2001/XMLSchema#string">UMLS:C0742038</oboInOwl:hasDbXref>
        <oboInOwl:hasDbXref rdf:datatype="http://www.w3.org/2001/XMLSchema#string">UMLS:C1866129</oboInOwl:hasDbXref>
        <oboInOwl:hasExactSynonym rdf:datatype="http://www.w3.org/2001/XMLSchema#string">Abnormality of the cerebellum</oboInOwl:hasExactSynonym>
        <oboInOwl:hasExactSynonym rdf:datatype="http://www.w3.org/2001/XMLSchema#string">Cerebellar abnormalities</oboInOwl:hasExactSynonym>
        <oboInOwl:hasExactSynonym rdf:datatype="http://www.w3.org/2001/XMLSchema#string">Cerebellar abnormality</oboInOwl:hasExactSynonym>
        <oboInOwl:hasExactSynonym rdf:datatype="http://www.w3.org/2001/XMLSchema#string">Cerebellar anomaly</oboInOwl:hasExactSynonym>
        <oboInOwl:hasExactSynonym rdf:datatype="http://www.w3.org/2001/XMLSchema#string">Cerebellar signs</oboInOwl:hasExactSynonym>
        <oboInOwl:hasOBONamespace rdf:datatype="http://www.w3.org/2001/XMLSchema#string">human_phenotype</oboInOwl:hasOBONamespace>
        <oboInOwl:id rdf:datatype="http://www.w3.org/2001/XMLSchema#string">HP:0001317</oboInOwl:id>
        <rdfs:label rdf:datatype="http://www.w3.org/2001/XMLSchema#string">Abnormality of the cerebellum</rdfs:label>
    </owl:Class>
    <owl:Axiom>
        <owl:annotatedSource rdf:resource="http://purl.obolibrary.org/obo/HP_0001317"/>
        <owl:annotatedProperty rdf:resource="http://purl.obolibrary.org/obo/IAO_0000115"/>
        <owl:annotatedTarget rdf:datatype="http://www.w3.org/2001/XMLSchema#string">An abnormality of the cerebellum.</owl:annotatedTarget>
        <oboInOwl:hasDbXref rdf:datatype="http://www.w3.org/2001/XMLSchema#string">HPO:probinson</oboInOwl:hasDbXref>
    </owl:Axiom>
    <owl:Axiom>
        <owl:annotatedSource rdf:resource="http://purl.obolibrary.org/obo/HP_0001317"/>
        <owl:annotatedProperty rdf:resource="http://www.geneontology.org/formats/oboInOwl#hasExactSynonym"/>
        <owl:annotatedTarget rdf:datatype="http://www.w3.org/2001/XMLSchema#string">Abnormality of the cerebellum</owl:annotatedTarget>
        <oboInOwl:hasSynonymType rdf:resource="http://purl.obolibrary.org/obo/hp.owl#layperson"/>
    </owl:Axiom>
    <owl:Axiom>
        <owl:annotatedSource rdf:resource="http://purl.obolibrary.org/obo/HP_0001317"/>
        <owl:annotatedProperty rdf:resource="http://www.geneontology.org/formats/oboInOwl#hasExactSynonym"/>
        <owl:annotatedTarget rdf:datatype="http://www.w3.org/2001/XMLSchema#string">Cerebellar abnormalities</owl:annotatedTarget>
        <oboInOwl:hasSynonymType rdf:resource="http://purl.obolibrary.org/obo/hp.owl#layperson"/>
    </owl:Axiom>
    <owl:Axiom>
        <owl:annotatedSource rdf:resource="http://purl.obolibrary.org/obo/HP_0001317"/>
        <owl:annotatedProperty rdf:resource="http://www.geneontology.org/formats/oboInOwl#hasExactSynonym"/>
        <owl:annotatedTarget rdf:datatype="http://www.w3.org/2001/XMLSchema#string">Cerebellar abnormality</owl:annotatedTarget>
        <oboInOwl:hasSynonymType rdf:resource="http://purl.obolibrary.org/obo/hp.owl#layperson"/>
    </owl:Axiom>
    <owl:Axiom>
        <owl:annotatedSource rdf:resource="http://purl.obolibrary.org/obo/HP_0001317"/>
        <owl:annotatedProperty rdf:resource="http://www.geneontology.org/formats/oboInOwl#hasExactSynonym"/>
        <owl:annotatedTarget rdf:datatype="http://www.w3.org/2001/XMLSchema#string">Cerebellar anomaly</owl:annotatedTarget>
        <oboInOwl:hasSynonymType rdf:resource="http://purl.obolibrary.org/obo/hp.owl#layperson"/>
    </owl:Axiom>
    


    <!-- http://purl.obolibrary.org/obo/HP_0001337 -->

    <owl:Class rdf:about="http://purl.obolibrary.org/obo/HP_0001337">
        <rdfs:subClassOf rdf:resource="http://purl.obolibrary.org/obo/HP_0004305"/>
        <obo:IAO_0000115 rdf:datatype="http://www.w3.org/2001/XMLSchema#string">An unintentional, oscillating to-and-fro muscle movement about a joint axis.</obo:IAO_0000115>
        <oboInOwl:hasAlternativeId rdf:datatype="http://www.w3.org/2001/XMLSchema#string">HP:0001295</oboInOwl:hasAlternativeId>
        <oboInOwl:hasAlternativeId rdf:datatype="http://www.w3.org/2001/XMLSchema#string">HP:0001309</oboInOwl:hasAlternativeId>
        <oboInOwl:hasDbXref rdf:datatype="http://www.w3.org/2001/XMLSchema#string">MSH:D014202</oboInOwl:hasDbXref>
        <oboInOwl:hasDbXref rdf:datatype="http://www.w3.org/2001/XMLSchema#string">SNOMEDCT_US:26079004</oboInOwl:hasDbXref>
        <oboInOwl:hasDbXref rdf:datatype="http://www.w3.org/2001/XMLSchema#string">UMLS:C0040822</oboInOwl:hasDbXref>
        <oboInOwl:hasExactSynonym rdf:datatype="http://www.w3.org/2001/XMLSchema#string">Tremor</oboInOwl:hasExactSynonym>
        <oboInOwl:hasExactSynonym>Tremors</oboInOwl:hasExactSynonym>
        <oboInOwl:hasOBONamespace rdf:datatype="http://www.w3.org/2001/XMLSchema#string">human_phenotype</oboInOwl:hasOBONamespace>
        <oboInOwl:id rdf:datatype="http://www.w3.org/2001/XMLSchema#string">HP:0001337</oboInOwl:id>
        <rdfs:comment>Tremor is differentiated from other involuntary movement disorders, such as chorea, athetosis, ballism, tics, and myoclonus, by its repetitive, stereotyped movements of a regular amplitude and frequency. Clonus, unlike tremor, represents a rhythmic movement, which is increased by muscle stretching.</rdfs:comment>
        <rdfs:label rdf:datatype="http://www.w3.org/2001/XMLSchema#string">Tremor</rdfs:label>
    </owl:Class>
    <owl:Axiom>
        <owl:annotatedSource rdf:resource="http://purl.obolibrary.org/obo/HP_0001337"/>
        <owl:annotatedProperty rdf:resource="http://purl.obolibrary.org/obo/IAO_0000115"/>
        <owl:annotatedTarget rdf:datatype="http://www.w3.org/2001/XMLSchema#string">An unintentional, oscillating to-and-fro muscle movement about a joint axis.</owl:annotatedTarget>
        <oboInOwl:hasDbXref rdf:datatype="http://www.w3.org/2001/XMLSchema#string">HPO:probinson</oboInOwl:hasDbXref>
        <oboInOwl:hasDbXref rdf:datatype="http://www.w3.org/2001/XMLSchema#string">PMID:20589866</oboInOwl:hasDbXref>
        <oboInOwl:hasDbXref>pmid:16344298</oboInOwl:hasDbXref>
    </owl:Axiom>
    <owl:Axiom>
        <owl:annotatedSource rdf:resource="http://purl.obolibrary.org/obo/HP_0001337"/>
        <owl:annotatedProperty rdf:resource="http://www.geneontology.org/formats/oboInOwl#hasExactSynonym"/>
        <owl:annotatedTarget rdf:datatype="http://www.w3.org/2001/XMLSchema#string">Tremor</owl:annotatedTarget>
        <oboInOwl:hasSynonymType rdf:resource="http://purl.obolibrary.org/obo/hp.owl#layperson"/>
    </owl:Axiom>
    <owl:Axiom>
        <owl:annotatedSource rdf:resource="http://purl.obolibrary.org/obo/HP_0001337"/>
        <owl:annotatedProperty rdf:resource="http://www.geneontology.org/formats/oboInOwl#hasExactSynonym"/>
        <owl:annotatedTarget>Tremors</owl:annotatedTarget>
        <oboInOwl:hasSynonymType rdf:resource="http://purl.obolibrary.org/obo/HP_0045078"/>
        <oboInOwl:hasSynonymType rdf:resource="http://purl.obolibrary.org/obo/hp.owl#layperson"/>
    </owl:Axiom>
    


    <!-- http://purl.obolibrary.org/obo/HP_0002011 -->

    <owl:Class rdf:about="http://purl.obolibrary.org/obo/HP_0002011">
        <rdfs:subClassOf rdf:resource="http://purl.obolibrary.org/obo/HP_0012639"/>
        <obo:IAO_0000115 rdf:datatype="http://www.w3.org/2001/XMLSchema#string">A structural abnormality of the central nervous system.</obo:IAO_0000115>
        <oboInOwl:hasAlternativeId rdf:datatype="http://www.w3.org/2001/XMLSchema#string">HP:0002405</oboInOwl:hasAlternativeId>
        <oboInOwl:hasAlternativeId rdf:datatype="http://www.w3.org/2001/XMLSchema#string">HP:0002413</oboInOwl:hasAlternativeId>
        <oboInOwl:hasAlternativeId rdf:datatype="http://www.w3.org/2001/XMLSchema#string">HP:0002481</oboInOwl:hasAlternativeId>
        <oboInOwl:hasAlternativeId rdf:datatype="http://www.w3.org/2001/XMLSchema#string">HP:0007319</oboInOwl:hasAlternativeId>
        <oboInOwl:hasDbXref rdf:datatype="http://www.w3.org/2001/XMLSchema#string">MSH:D002493</oboInOwl:hasDbXref>
        <oboInOwl:hasDbXref rdf:datatype="http://www.w3.org/2001/XMLSchema#string">SNOMEDCT_US:23853001</oboInOwl:hasDbXref>
        <oboInOwl:hasDbXref rdf:datatype="http://www.w3.org/2001/XMLSchema#string">UMLS:C0007682</oboInOwl:hasDbXref>
        <oboInOwl:hasDbXref rdf:datatype="http://www.w3.org/2001/XMLSchema#string">UMLS:C4021765</oboInOwl:hasDbXref>
        <oboInOwl:hasExactSynonym rdf:datatype="http://www.w3.org/2001/XMLSchema#string">Abnormality of the central nervous system</oboInOwl:hasExactSynonym>
        <oboInOwl:hasOBONamespace rdf:datatype="http://www.w3.org/2001/XMLSchema#string">human_phenotype</oboInOwl:hasOBONamespace>
        <oboInOwl:hasRelatedSynonym rdf:datatype="http://www.w3.org/2001/XMLSchema#string">Central nervous system disease</oboInOwl:hasRelatedSynonym>
        <oboInOwl:id rdf:datatype="http://www.w3.org/2001/XMLSchema#string">HP:0002011</oboInOwl:id>
        <rdfs:label rdf:datatype="http://www.w3.org/2001/XMLSchema#string">Morphological abnormality of the central nervous system</rdfs:label>
    </owl:Class>
    <owl:Axiom>
        <owl:annotatedSource rdf:resource="http://purl.obolibrary.org/obo/HP_0002011"/>
        <owl:annotatedProperty rdf:resource="http://purl.obolibrary.org/obo/IAO_0000115"/>
        <owl:annotatedTarget rdf:datatype="http://www.w3.org/2001/XMLSchema#string">A structural abnormality of the central nervous system.</owl:annotatedTarget>
        <oboInOwl:hasDbXref rdf:datatype="http://www.w3.org/2001/XMLSchema#string">HPO:probinson</oboInOwl:hasDbXref>
    </owl:Axiom>
    


    <!-- http://purl.obolibrary.org/obo/HP_0002066 -->

    <owl:Class rdf:about="http://purl.obolibrary.org/obo/HP_0002066">
        <rdfs:subClassOf rdf:resource="http://purl.obolibrary.org/obo/HP_0001288"/>
        <rdfs:subClassOf rdf:resource="http://purl.obolibrary.org/obo/HP_0002078"/>
        <obo:IAO_0000115 rdf:datatype="http://www.w3.org/2001/XMLSchema#string">A type of ataxia characterized by the impairment of the ability to coordinate the movements required for normal walking. Gait ataxia is characteirzed by a wide-based staggering gait with a tendency to fall.</obo:IAO_0000115>
        <oboInOwl:hasAlternativeId rdf:datatype="http://www.w3.org/2001/XMLSchema#string">HP:0002379</oboInOwl:hasAlternativeId>
        <oboInOwl:hasDbXref rdf:datatype="http://www.w3.org/2001/XMLSchema#string">MSH:D020234</oboInOwl:hasDbXref>
        <oboInOwl:hasDbXref rdf:datatype="http://www.w3.org/2001/XMLSchema#string">SNOMEDCT_US:25136009</oboInOwl:hasDbXref>
        <oboInOwl:hasDbXref rdf:datatype="http://www.w3.org/2001/XMLSchema#string">UMLS:C0751837</oboInOwl:hasDbXref>
        <oboInOwl:hasExactSynonym>Ataxia of gait</oboInOwl:hasExactSynonym>
        <oboInOwl:hasExactSynonym rdf:datatype="http://www.w3.org/2001/XMLSchema#string">Ataxic gait</oboInOwl:hasExactSynonym>
        <oboInOwl:hasOBONamespace rdf:datatype="http://www.w3.org/2001/XMLSchema#string">human_phenotype</oboInOwl:hasOBONamespace>
        <oboInOwl:id rdf:datatype="http://www.w3.org/2001/XMLSchema#string">HP:0002066</oboInOwl:id>
        <rdfs:label rdf:datatype="http://www.w3.org/2001/XMLSchema#string">Gait ataxia</rdfs:label>
    </owl:Class>
    <owl:Axiom>
        <owl:annotatedSource rdf:resource="http://purl.obolibrary.org/obo/HP_0002066"/>
        <owl:annotatedProperty rdf:resource="http://purl.obolibrary.org/obo/IAO_0000115"/>
        <owl:annotatedTarget rdf:datatype="http://www.w3.org/2001/XMLSchema#string">A type of ataxia characterized by the impairment of the ability to coordinate the movements required for normal walking. Gait ataxia is characteirzed by a wide-based staggering gait with a tendency to fall.</owl:annotatedTarget>
        <oboInOwl:hasDbXref rdf:datatype="http://www.w3.org/2001/XMLSchema#string">HPO:probinson</oboInOwl:hasDbXref>
        <oboInOwl:hasDbXref rdf:datatype="http://www.w3.org/2001/XMLSchema#string">UKT:rschuele</oboInOwl:hasDbXref>
    </owl:Axiom>
    


    <!-- http://purl.obolibrary.org/obo/HP_0002070 -->

    <owl:Class rdf:about="http://purl.obolibrary.org/obo/HP_0002070">
        <rdfs:subClassOf rdf:resource="http://purl.obolibrary.org/obo/HP_0001251"/>
        <obo:IAO_0000115 rdf:datatype="http://www.w3.org/2001/XMLSchema#string">A kind of ataxia that affects movements of the extremities.</obo:IAO_0000115>
        <oboInOwl:hasDbXref rdf:datatype="http://www.w3.org/2001/XMLSchema#string">MSH:D001259</oboInOwl:hasDbXref>
        <oboInOwl:hasDbXref rdf:datatype="http://www.w3.org/2001/XMLSchema#string">UMLS:C0750937</oboInOwl:hasDbXref>
        <oboInOwl:hasExactSynonym rdf:datatype="http://www.w3.org/2001/XMLSchema#string">Appendicular ataxia</oboInOwl:hasExactSynonym>
        <oboInOwl:hasOBONamespace rdf:datatype="http://www.w3.org/2001/XMLSchema#string">human_phenotype</oboInOwl:hasOBONamespace>
        <oboInOwl:id rdf:datatype="http://www.w3.org/2001/XMLSchema#string">HP:0002070</oboInOwl:id>
        <rdfs:comment rdf:datatype="http://www.w3.org/2001/XMLSchema#string">Limb ataxia is generally caused by lesions of the cerebellar hemispheres and associated pathways.</rdfs:comment>
        <rdfs:label rdf:datatype="http://www.w3.org/2001/XMLSchema#string">Limb ataxia</rdfs:label>
    </owl:Class>
    <owl:Axiom>
        <owl:annotatedSource rdf:resource="http://purl.obolibrary.org/obo/HP_0002070"/>
        <owl:annotatedProperty rdf:resource="http://purl.obolibrary.org/obo/IAO_0000115"/>
        <owl:annotatedTarget rdf:datatype="http://www.w3.org/2001/XMLSchema#string">A kind of ataxia that affects movements of the extremities.</owl:annotatedTarget>
        <oboInOwl:hasDbXref rdf:datatype="http://www.w3.org/2001/XMLSchema#string">HPO:probinson</oboInOwl:hasDbXref>
    </owl:Axiom>
    


    <!-- http://purl.obolibrary.org/obo/HP_0002075 -->

    <owl:Class rdf:about="http://purl.obolibrary.org/obo/HP_0002075">
        <rdfs:subClassOf rdf:resource="http://purl.obolibrary.org/obo/HP_0002070"/>
        <obo:IAO_0000115 rdf:datatype="http://www.w3.org/2001/XMLSchema#string">A type of ataxia characterized by the impairment of the ability to perform rapidly alternating movements, such as rhythmically tapping the fingers on the knee.</obo:IAO_0000115>
        <oboInOwl:hasAlternativeId rdf:datatype="http://www.w3.org/2001/XMLSchema#string">HP:0002426</oboInOwl:hasAlternativeId>
        <oboInOwl:hasDbXref rdf:datatype="http://www.w3.org/2001/XMLSchema#string">SNOMEDCT_US:23133003</oboInOwl:hasDbXref>
        <oboInOwl:hasDbXref rdf:datatype="http://www.w3.org/2001/XMLSchema#string">UMLS:C0234979</oboInOwl:hasDbXref>
        <oboInOwl:hasExactSynonym rdf:datatype="http://www.w3.org/2001/XMLSchema#string">Dysdiadochokinesia</oboInOwl:hasExactSynonym>
        <oboInOwl:hasOBONamespace rdf:datatype="http://www.w3.org/2001/XMLSchema#string">human_phenotype</oboInOwl:hasOBONamespace>
        <oboInOwl:id rdf:datatype="http://www.w3.org/2001/XMLSchema#string">HP:0002075</oboInOwl:id>
        <rdfs:comment rdf:datatype="http://www.w3.org/2001/XMLSchema#string">Inability to perform rapid, alternating movements. Dysdiadochokinesis is generally related to a cerebellar lesion.</rdfs:comment>
        <rdfs:label rdf:datatype="http://www.w3.org/2001/XMLSchema#string">Dysdiadochokinesis</rdfs:label>
    </owl:Class>
    <owl:Axiom>
        <owl:annotatedSource rdf:resource="http://purl.obolibrary.org/obo/HP_0002075"/>
        <owl:annotatedProperty rdf:resource="http://purl.obolibrary.org/obo/IAO_0000115"/>
        <owl:annotatedTarget rdf:datatype="http://www.w3.org/2001/XMLSchema#string">A type of ataxia characterized by the impairment of the ability to perform rapidly alternating movements, such as rhythmically tapping the fingers on the knee.</owl:annotatedTarget>
        <oboInOwl:hasDbXref rdf:datatype="http://www.w3.org/2001/XMLSchema#string">HPO:probinson</oboInOwl:hasDbXref>
        <oboInOwl:hasDbXref rdf:datatype="http://www.w3.org/2001/XMLSchema#string">UKB:tklockgether</oboInOwl:hasDbXref>
    </owl:Axiom>
    


    <!-- http://purl.obolibrary.org/obo/HP_0002078 -->

    <owl:Class rdf:about="http://purl.obolibrary.org/obo/HP_0002078">
        <rdfs:subClassOf rdf:resource="http://purl.obolibrary.org/obo/HP_0001251"/>
        <obo:IAO_0000115 rdf:datatype="http://www.w3.org/2001/XMLSchema#string">Truncal ataxia is a sign of ataxia characterized by instability of the trunk. It usually occurs during sitting.</obo:IAO_0000115>
        <oboInOwl:hasAlternativeId rdf:datatype="http://www.w3.org/2001/XMLSchema#string">HP:0007014</oboInOwl:hasAlternativeId>
        <oboInOwl:hasDbXref rdf:datatype="http://www.w3.org/2001/XMLSchema#string">MSH:D001259</oboInOwl:hasDbXref>
        <oboInOwl:hasDbXref rdf:datatype="http://www.w3.org/2001/XMLSchema#string">SNOMEDCT_US:250067008</oboInOwl:hasDbXref>
        <oboInOwl:hasDbXref rdf:datatype="http://www.w3.org/2001/XMLSchema#string">UMLS:C0427190</oboInOwl:hasDbXref>
        <oboInOwl:hasExactSynonym rdf:datatype="http://www.w3.org/2001/XMLSchema#string">Trunk ataxia</oboInOwl:hasExactSynonym>
        <oboInOwl:hasOBONamespace rdf:datatype="http://www.w3.org/2001/XMLSchema#string">human_phenotype</oboInOwl:hasOBONamespace>
        <oboInOwl:id rdf:datatype="http://www.w3.org/2001/XMLSchema#string">HP:0002078</oboInOwl:id>
        <rdfs:comment rdf:datatype="http://www.w3.org/2001/XMLSchema#string">Truncal ataxia is generally caused by midline damage to the cerebellar vermis and associated pathways. Patients with truncal ataxia may not be able to sit or stand without support.</rdfs:comment>
        <rdfs:label rdf:datatype="http://www.w3.org/2001/XMLSchema#string">Truncal ataxia</rdfs:label>
    </owl:Class>
    <owl:Axiom>
        <owl:annotatedSource rdf:resource="http://purl.obolibrary.org/obo/HP_0002078"/>
        <owl:annotatedProperty rdf:resource="http://purl.obolibrary.org/obo/IAO_0000115"/>
        <owl:annotatedTarget rdf:datatype="http://www.w3.org/2001/XMLSchema#string">Truncal ataxia is a sign of ataxia characterized by instability of the trunk. It usually occurs during sitting.</owl:annotatedTarget>
        <oboInOwl:hasDbXref rdf:datatype="http://www.w3.org/2001/XMLSchema#string">HPO:probinson</oboInOwl:hasDbXref>
        <oboInOwl:hasDbXref rdf:datatype="http://www.w3.org/2001/XMLSchema#string">UKT:rschuele</oboInOwl:hasDbXref>
    </owl:Axiom>
    


    <!-- http://purl.obolibrary.org/obo/HP_0002080 -->

    <owl:Class rdf:about="http://purl.obolibrary.org/obo/HP_0002080">
        <rdfs:subClassOf rdf:resource="http://purl.obolibrary.org/obo/HP_0002070"/>
        <rdfs:subClassOf rdf:resource="http://purl.obolibrary.org/obo/HP_0030186"/>
        <obo:IAO_0000115 rdf:datatype="http://www.w3.org/2001/XMLSchema#string">A type of kinetic tremor that occurs during target directed movement is called intention tremor. That is, an oscillatory cerebellar ataxia that tends to be absent when the limbs are inactive and during the first part of voluntary movement but worsening as the movement continues and greater precision is required (e.g., in touching a target such as the patient&apos;s nose or a physician&apos;s finger).</obo:IAO_0000115>
        <oboInOwl:hasDbXref rdf:datatype="http://www.w3.org/2001/XMLSchema#string">MSH:D014202</oboInOwl:hasDbXref>
        <oboInOwl:hasDbXref rdf:datatype="http://www.w3.org/2001/XMLSchema#string">SNOMEDCT_US:30721006</oboInOwl:hasDbXref>
        <oboInOwl:hasDbXref rdf:datatype="http://www.w3.org/2001/XMLSchema#string">UMLS:C0234376</oboInOwl:hasDbXref>
        <oboInOwl:hasDbXref rdf:datatype="http://www.w3.org/2001/XMLSchema#string">UMLS:C4020856</oboInOwl:hasDbXref>
        <oboInOwl:hasOBONamespace rdf:datatype="http://www.w3.org/2001/XMLSchema#string">human_phenotype</oboInOwl:hasOBONamespace>
        <oboInOwl:hasRelatedSynonym>Cerebellar tremor</oboInOwl:hasRelatedSynonym>
        <oboInOwl:hasRelatedSynonym>Terminal tremor</oboInOwl:hasRelatedSynonym>
        <oboInOwl:id rdf:datatype="http://www.w3.org/2001/XMLSchema#string">HP:0002080</oboInOwl:id>
        <rdfs:label rdf:datatype="http://www.w3.org/2001/XMLSchema#string">Intention tremor</rdfs:label>
    </owl:Class>
    <owl:Axiom>
        <owl:annotatedSource rdf:resource="http://purl.obolibrary.org/obo/HP_0002080"/>
        <owl:annotatedProperty rdf:resource="http://purl.obolibrary.org/obo/IAO_0000115"/>
        <owl:annotatedTarget rdf:datatype="http://www.w3.org/2001/XMLSchema#string">A type of kinetic tremor that occurs during target directed movement is called intention tremor. That is, an oscillatory cerebellar ataxia that tends to be absent when the limbs are inactive and during the first part of voluntary movement but worsening as the movement continues and greater precision is required (e.g., in touching a target such as the patient&apos;s nose or a physician&apos;s finger).</owl:annotatedTarget>
        <oboInOwl:hasDbXref rdf:datatype="http://www.w3.org/2001/XMLSchema#string">HPO:probinson</oboInOwl:hasDbXref>
        <oboInOwl:hasDbXref>pmid:16344298</oboInOwl:hasDbXref>
    </owl:Axiom>
    


    <!-- http://purl.obolibrary.org/obo/HP_0002167 -->

    <owl:Class rdf:about="http://purl.obolibrary.org/obo/HP_0002167">
        <rdfs:subClassOf rdf:resource="http://purl.obolibrary.org/obo/HP_0011446"/>
        <oboInOwl:hasDbXref rdf:datatype="http://www.w3.org/2001/XMLSchema#string">MSH:D013064</oboInOwl:hasDbXref>
        <oboInOwl:hasDbXref rdf:datatype="http://www.w3.org/2001/XMLSchema#string">UMLS:C0037822</oboInOwl:hasDbXref>
        <oboInOwl:hasExactSynonym rdf:datatype="http://www.w3.org/2001/XMLSchema#string">Speech disorder</oboInOwl:hasExactSynonym>
        <oboInOwl:hasExactSynonym rdf:datatype="http://www.w3.org/2001/XMLSchema#string">Speech impairment</oboInOwl:hasExactSynonym>
        <oboInOwl:hasExactSynonym rdf:datatype="http://www.w3.org/2001/XMLSchema#string">Speech impediment</oboInOwl:hasExactSynonym>
        <oboInOwl:hasOBONamespace rdf:datatype="http://www.w3.org/2001/XMLSchema#string">human_phenotype</oboInOwl:hasOBONamespace>
        <oboInOwl:id rdf:datatype="http://www.w3.org/2001/XMLSchema#string">HP:0002167</oboInOwl:id>
        <rdfs:label rdf:datatype="http://www.w3.org/2001/XMLSchema#string">Neurological speech impairment</rdfs:label>
    </owl:Class>
    <owl:Axiom>
        <owl:annotatedSource rdf:resource="http://purl.obolibrary.org/obo/HP_0002167"/>
        <owl:annotatedProperty rdf:resource="http://www.geneontology.org/formats/oboInOwl#hasExactSynonym"/>
        <owl:annotatedTarget rdf:datatype="http://www.w3.org/2001/XMLSchema#string">Speech disorder</owl:annotatedTarget>
        <oboInOwl:hasSynonymType rdf:resource="http://purl.obolibrary.org/obo/hp.owl#layperson"/>
    </owl:Axiom>
    <owl:Axiom>
        <owl:annotatedSource rdf:resource="http://purl.obolibrary.org/obo/HP_0002167"/>
        <owl:annotatedProperty rdf:resource="http://www.geneontology.org/formats/oboInOwl#hasExactSynonym"/>
        <owl:annotatedTarget rdf:datatype="http://www.w3.org/2001/XMLSchema#string">Speech impairment</owl:annotatedTarget>
        <oboInOwl:hasSynonymType rdf:resource="http://purl.obolibrary.org/obo/hp.owl#layperson"/>
    </owl:Axiom>
    <owl:Axiom>
        <owl:annotatedSource rdf:resource="http://purl.obolibrary.org/obo/HP_0002167"/>
        <owl:annotatedProperty rdf:resource="http://www.geneontology.org/formats/oboInOwl#hasExactSynonym"/>
        <owl:annotatedTarget rdf:datatype="http://www.w3.org/2001/XMLSchema#string">Speech impediment</owl:annotatedTarget>
        <oboInOwl:hasSynonymType rdf:resource="http://purl.obolibrary.org/obo/hp.owl#layperson"/>
    </owl:Axiom>
    


    <!-- http://purl.obolibrary.org/obo/HP_0002345 -->

    <owl:Class rdf:about="http://purl.obolibrary.org/obo/HP_0002345">
        <rdfs:subClassOf rdf:resource="http://purl.obolibrary.org/obo/HP_0001337"/>
        <obo:IAO_0000115 rdf:datatype="http://www.w3.org/2001/XMLSchema#string">A tremor present when the limbs are active, either when outstretched in a certain position or throughout a voluntary movement.</obo:IAO_0000115>
        <oboInOwl:hasDbXref rdf:datatype="http://www.w3.org/2001/XMLSchema#string">MSH:D014202</oboInOwl:hasDbXref>
        <oboInOwl:hasDbXref rdf:datatype="http://www.w3.org/2001/XMLSchema#string">SNOMEDCT_US:30721006</oboInOwl:hasDbXref>
        <oboInOwl:hasDbXref rdf:datatype="http://www.w3.org/2001/XMLSchema#string">UMLS:C0234376</oboInOwl:hasDbXref>
        <oboInOwl:hasDbXref rdf:datatype="http://www.w3.org/2001/XMLSchema#string">UMLS:C4020853</oboInOwl:hasDbXref>
        <oboInOwl:hasOBONamespace rdf:datatype="http://www.w3.org/2001/XMLSchema#string">human_phenotype</oboInOwl:hasOBONamespace>
        <oboInOwl:hasRelatedSynonym>Ataxic tremor</oboInOwl:hasRelatedSynonym>
        <oboInOwl:id rdf:datatype="http://www.w3.org/2001/XMLSchema#string">HP:0002345</oboInOwl:id>
        <rdfs:comment>Action tremor occurs with voluntary contraction of muscle. Subforms of action tremor include postural, isometric, and kinetic tremors</rdfs:comment>
        <rdfs:label rdf:datatype="http://www.w3.org/2001/XMLSchema#string">Action tremor</rdfs:label>
    </owl:Class>
    <owl:Axiom>
        <owl:annotatedSource rdf:resource="http://purl.obolibrary.org/obo/HP_0002345"/>
        <owl:annotatedProperty rdf:resource="http://purl.obolibrary.org/obo/IAO_0000115"/>
        <owl:annotatedTarget rdf:datatype="http://www.w3.org/2001/XMLSchema#string">A tremor present when the limbs are active, either when outstretched in a certain position or throughout a voluntary movement.</owl:annotatedTarget>
        <oboInOwl:hasDbXref rdf:datatype="http://www.w3.org/2001/XMLSchema#string">HPO:curators</oboInOwl:hasDbXref>
    </owl:Axiom>
    


    <!-- http://purl.obolibrary.org/obo/HP_0002406 -->

    <owl:Class rdf:about="http://purl.obolibrary.org/obo/HP_0002406">
        <rdfs:subClassOf rdf:resource="http://purl.obolibrary.org/obo/HP_0001310"/>
        <rdfs:subClassOf rdf:resource="http://purl.obolibrary.org/obo/HP_0002070"/>
        <obo:IAO_0000115 rdf:datatype="http://www.w3.org/2001/XMLSchema#string">A type of dysmetria involving the limbs.</obo:IAO_0000115>
        <oboInOwl:hasDbXref rdf:datatype="http://www.w3.org/2001/XMLSchema#string">UMLS:C1854489</oboInOwl:hasDbXref>
        <oboInOwl:hasDbXref rdf:datatype="http://www.w3.org/2001/XMLSchema#string">UMLS:C4280577</oboInOwl:hasDbXref>
        <oboInOwl:hasNarrowSynonym>Uncoordinated limb movement</oboInOwl:hasNarrowSynonym>
        <oboInOwl:hasOBONamespace rdf:datatype="http://www.w3.org/2001/XMLSchema#string">human_phenotype</oboInOwl:hasOBONamespace>
        <oboInOwl:id rdf:datatype="http://www.w3.org/2001/XMLSchema#string">HP:0002406</oboInOwl:id>
        <rdfs:label rdf:datatype="http://www.w3.org/2001/XMLSchema#string">Limb dysmetria</rdfs:label>
    </owl:Class>
    <owl:Axiom>
        <owl:annotatedSource rdf:resource="http://purl.obolibrary.org/obo/HP_0002406"/>
        <owl:annotatedProperty rdf:resource="http://purl.obolibrary.org/obo/IAO_0000115"/>
        <owl:annotatedTarget rdf:datatype="http://www.w3.org/2001/XMLSchema#string">A type of dysmetria involving the limbs.</owl:annotatedTarget>
        <oboInOwl:hasDbXref rdf:datatype="http://www.w3.org/2001/XMLSchema#string">HPO:probinson</oboInOwl:hasDbXref>
    </owl:Axiom>
    <owl:Axiom>
        <owl:annotatedSource rdf:resource="http://purl.obolibrary.org/obo/HP_0002406"/>
        <owl:annotatedProperty rdf:resource="http://www.geneontology.org/formats/oboInOwl#hasNarrowSynonym"/>
        <owl:annotatedTarget>Uncoordinated limb movement</owl:annotatedTarget>
        <oboInOwl:hasDbXref>orcid.org/0000-0001-6908-9849</oboInOwl:hasDbXref>
        <oboInOwl:hasSynonymType rdf:resource="http://purl.obolibrary.org/obo/hp.owl#layperson"/>
    </owl:Axiom>
    


    <!-- http://purl.obolibrary.org/obo/HP_0002425 -->

    <owl:Class rdf:about="http://purl.obolibrary.org/obo/HP_0002425">
        <owl:equivalentClass>
            <owl:Class>
                <owl:intersectionOf rdf:parseType="Collection">
                    <rdf:Description rdf:about="http://purl.obolibrary.org/obo/HP_0001260"/>
                    <owl:Restriction>
                        <owl:onProperty rdf:resource="http://purl.obolibrary.org/obo/hp.owl#has_severity"/>
                        <owl:someValuesFrom rdf:resource="http://purl.obolibrary.org/obo/HP_0012829"/>
                    </owl:Restriction>
                </owl:intersectionOf>
            </owl:Class>
        </owl:equivalentClass>
        <rdfs:subClassOf rdf:resource="http://purl.obolibrary.org/obo/HP_0001260"/>
        <obo:IAO_0000115 rdf:datatype="http://www.w3.org/2001/XMLSchema#string">A defect in the motor ability that enables speech.</obo:IAO_0000115>
        <oboInOwl:hasDbXref rdf:datatype="http://www.w3.org/2001/XMLSchema#string">SNOMEDCT_US:48257004</oboInOwl:hasDbXref>
        <oboInOwl:hasDbXref rdf:datatype="http://www.w3.org/2001/XMLSchema#string">UMLS:C0234517</oboInOwl:hasDbXref>
        <oboInOwl:hasExactSynonym>Loss of articulate speech</oboInOwl:hasExactSynonym>
        <oboInOwl:hasOBONamespace rdf:datatype="http://www.w3.org/2001/XMLSchema#string">human_phenotype</oboInOwl:hasOBONamespace>
        <oboInOwl:id rdf:datatype="http://www.w3.org/2001/XMLSchema#string">HP:0002425</oboInOwl:id>
        <rdfs:label rdf:datatype="http://www.w3.org/2001/XMLSchema#string">Anarthria</rdfs:label>
    </owl:Class>
    <owl:Axiom>
        <owl:annotatedSource rdf:resource="http://purl.obolibrary.org/obo/HP_0002425"/>
        <owl:annotatedProperty rdf:resource="http://purl.obolibrary.org/obo/IAO_0000115"/>
        <owl:annotatedTarget rdf:datatype="http://www.w3.org/2001/XMLSchema#string">A defect in the motor ability that enables speech.</owl:annotatedTarget>
        <oboInOwl:hasDbXref rdf:datatype="http://www.w3.org/2001/XMLSchema#string">HPO:curators</oboInOwl:hasDbXref>
    </owl:Axiom>
    <owl:Axiom>
        <owl:annotatedSource rdf:resource="http://purl.obolibrary.org/obo/HP_0002425"/>
        <owl:annotatedProperty rdf:resource="http://www.geneontology.org/formats/oboInOwl#hasExactSynonym"/>
        <owl:annotatedTarget>Loss of articulate speech</owl:annotatedTarget>
        <oboInOwl:hasDbXref>http://dictionary.reference.com/browse/anarthria</oboInOwl:hasDbXref>
        <oboInOwl:hasDbXref>orcid.org/0000-0001-5208-3432</oboInOwl:hasDbXref>
        <oboInOwl:hasSynonymType rdf:resource="http://purl.obolibrary.org/obo/hp.owl#layperson"/>
    </owl:Axiom>
    


    <!-- http://purl.obolibrary.org/obo/HP_0003011 -->

    <owl:Class rdf:about="http://purl.obolibrary.org/obo/HP_0003011">
        <rdfs:subClassOf rdf:resource="http://purl.obolibrary.org/obo/HP_0000118"/>
        <obo:IAO_0000115 rdf:datatype="http://www.w3.org/2001/XMLSchema#string">Abnormality originating in one or more muscles, i.e., of the set of muscles of body.</obo:IAO_0000115>
        <oboInOwl:hasAlternativeId rdf:datatype="http://www.w3.org/2001/XMLSchema#string">HP:0003197</oboInOwl:hasAlternativeId>
        <oboInOwl:hasAlternativeId rdf:datatype="http://www.w3.org/2001/XMLSchema#string">HP:0003708</oboInOwl:hasAlternativeId>
        <oboInOwl:hasDbXref rdf:datatype="http://www.w3.org/2001/XMLSchema#string">UMLS:C4021745</oboInOwl:hasDbXref>
        <oboInOwl:hasExactSynonym rdf:datatype="http://www.w3.org/2001/XMLSchema#string">Muscular abnormality</oboInOwl:hasExactSynonym>
        <oboInOwl:hasOBONamespace rdf:datatype="http://www.w3.org/2001/XMLSchema#string">human_phenotype</oboInOwl:hasOBONamespace>
        <oboInOwl:id rdf:datatype="http://www.w3.org/2001/XMLSchema#string">HP:0003011</oboInOwl:id>
        <rdfs:label rdf:datatype="http://www.w3.org/2001/XMLSchema#string">Abnormality of the musculature</rdfs:label>
    </owl:Class>
    <owl:Axiom>
        <owl:annotatedSource rdf:resource="http://purl.obolibrary.org/obo/HP_0003011"/>
        <owl:annotatedProperty rdf:resource="http://purl.obolibrary.org/obo/IAO_0000115"/>
        <owl:annotatedTarget rdf:datatype="http://www.w3.org/2001/XMLSchema#string">Abnormality originating in one or more muscles, i.e., of the set of muscles of body.</owl:annotatedTarget>
        <oboInOwl:hasDbXref rdf:datatype="http://www.w3.org/2001/XMLSchema#string">HPO:probinson</oboInOwl:hasDbXref>
    </owl:Axiom>
    <owl:Axiom>
        <owl:annotatedSource rdf:resource="http://purl.obolibrary.org/obo/HP_0003011"/>
        <owl:annotatedProperty rdf:resource="http://www.geneontology.org/formats/oboInOwl#hasExactSynonym"/>
        <owl:annotatedTarget rdf:datatype="http://www.w3.org/2001/XMLSchema#string">Muscular abnormality</owl:annotatedTarget>
        <oboInOwl:hasSynonymType rdf:resource="http://purl.obolibrary.org/obo/hp.owl#layperson"/>
    </owl:Axiom>
    


    <!-- http://purl.obolibrary.org/obo/HP_0003808 -->

    <owl:Class rdf:about="http://purl.obolibrary.org/obo/HP_0003808">
        <rdfs:subClassOf rdf:resource="http://purl.obolibrary.org/obo/HP_0011804"/>
        <oboInOwl:hasDbXref rdf:datatype="http://www.w3.org/2001/XMLSchema#string">UMLS:C0852413</oboInOwl:hasDbXref>
        <oboInOwl:hasExactSynonym rdf:datatype="http://www.w3.org/2001/XMLSchema#string">Abnormal muscle tone</oboInOwl:hasExactSynonym>
        <oboInOwl:hasOBONamespace rdf:datatype="http://www.w3.org/2001/XMLSchema#string">human_phenotype</oboInOwl:hasOBONamespace>
        <oboInOwl:id rdf:datatype="http://www.w3.org/2001/XMLSchema#string">HP:0003808</oboInOwl:id>
        <rdfs:label rdf:datatype="http://www.w3.org/2001/XMLSchema#string">Abnormal muscle tone</rdfs:label>
    </owl:Class>
    <owl:Axiom>
        <owl:annotatedSource rdf:resource="http://purl.obolibrary.org/obo/HP_0003808"/>
        <owl:annotatedProperty rdf:resource="http://www.geneontology.org/formats/oboInOwl#hasExactSynonym"/>
        <owl:annotatedTarget rdf:datatype="http://www.w3.org/2001/XMLSchema#string">Abnormal muscle tone</owl:annotatedTarget>
        <oboInOwl:hasSynonymType rdf:resource="http://purl.obolibrary.org/obo/hp.owl#layperson"/>
    </owl:Axiom>
    


    <!-- http://purl.obolibrary.org/obo/HP_0004305 -->

    <owl:Class rdf:about="http://purl.obolibrary.org/obo/HP_0004305">
        <rdfs:subClassOf rdf:resource="http://purl.obolibrary.org/obo/HP_0100022"/>
        <obo:IAO_0000115 rdf:datatype="http://www.w3.org/2001/XMLSchema#string">Involuntary contractions of muscle leading to involuntary movements of extremities, neck, trunk, or face.</obo:IAO_0000115>
        <oboInOwl:created_by rdf:datatype="http://www.w3.org/2001/XMLSchema#string">peter</oboInOwl:created_by>
        <oboInOwl:creation_date rdf:datatype="http://www.w3.org/2001/XMLSchema#string">2008-02-20T12:18:00Z</oboInOwl:creation_date>
        <oboInOwl:hasAlternativeId rdf:datatype="http://www.w3.org/2001/XMLSchema#string">HP:0007120</oboInOwl:hasAlternativeId>
        <oboInOwl:hasDbXref rdf:datatype="http://www.w3.org/2001/XMLSchema#string">SNOMEDCT_US:102542000</oboInOwl:hasDbXref>
        <oboInOwl:hasDbXref rdf:datatype="http://www.w3.org/2001/XMLSchema#string">UMLS:C0235086</oboInOwl:hasDbXref>
        <oboInOwl:hasExactSynonym rdf:datatype="http://www.w3.org/2001/XMLSchema#string">Involuntary movements</oboInOwl:hasExactSynonym>
        <oboInOwl:hasExactSynonym rdf:datatype="http://www.w3.org/2001/XMLSchema#string">Involuntary muscle contractions</oboInOwl:hasExactSynonym>
        <oboInOwl:hasOBONamespace rdf:datatype="http://www.w3.org/2001/XMLSchema#string">human_phenotype</oboInOwl:hasOBONamespace>
        <oboInOwl:id rdf:datatype="http://www.w3.org/2001/XMLSchema#string">HP:0004305</oboInOwl:id>
        <rdfs:label rdf:datatype="http://www.w3.org/2001/XMLSchema#string">Involuntary movements</rdfs:label>
    </owl:Class>
    <owl:Axiom>
        <owl:annotatedSource rdf:resource="http://purl.obolibrary.org/obo/HP_0004305"/>
        <owl:annotatedProperty rdf:resource="http://purl.obolibrary.org/obo/IAO_0000115"/>
        <owl:annotatedTarget rdf:datatype="http://www.w3.org/2001/XMLSchema#string">Involuntary contractions of muscle leading to involuntary movements of extremities, neck, trunk, or face.</owl:annotatedTarget>
        <oboInOwl:hasDbXref rdf:datatype="http://www.w3.org/2001/XMLSchema#string">HPO:probinson</oboInOwl:hasDbXref>
    </owl:Axiom>
    <owl:Axiom>
        <owl:annotatedSource rdf:resource="http://purl.obolibrary.org/obo/HP_0004305"/>
        <owl:annotatedProperty rdf:resource="http://www.geneontology.org/formats/oboInOwl#hasExactSynonym"/>
        <owl:annotatedTarget rdf:datatype="http://www.w3.org/2001/XMLSchema#string">Involuntary movements</owl:annotatedTarget>
        <oboInOwl:hasSynonymType rdf:resource="http://purl.obolibrary.org/obo/hp.owl#layperson"/>
    </owl:Axiom>
    <owl:Axiom>
        <owl:annotatedSource rdf:resource="http://purl.obolibrary.org/obo/HP_0004305"/>
        <owl:annotatedProperty rdf:resource="http://www.geneontology.org/formats/oboInOwl#hasExactSynonym"/>
        <owl:annotatedTarget rdf:datatype="http://www.w3.org/2001/XMLSchema#string">Involuntary muscle contractions</owl:annotatedTarget>
        <oboInOwl:hasSynonymType rdf:resource="http://purl.obolibrary.org/obo/hp.owl#layperson"/>
    </owl:Axiom>
    


    <!-- http://purl.obolibrary.org/obo/HP_0011282 -->

    <owl:Class rdf:about="http://purl.obolibrary.org/obo/HP_0011282">
        <rdfs:subClassOf rdf:resource="http://purl.obolibrary.org/obo/HP_0012443"/>
        <obo:IAO_0000115 rdf:datatype="http://www.w3.org/2001/XMLSchema#string">An abnormality of the hindbrain, also known as the rhombencephalon.</obo:IAO_0000115>
        <oboInOwl:created_by rdf:datatype="http://www.w3.org/2001/XMLSchema#string">peter</oboInOwl:created_by>
        <oboInOwl:creation_date rdf:datatype="http://www.w3.org/2001/XMLSchema#string">2012-01-01T01:22:36Z</oboInOwl:creation_date>
        <oboInOwl:hasDbXref rdf:datatype="http://www.w3.org/2001/XMLSchema#string">UMLS:C4021170</oboInOwl:hasDbXref>
        <oboInOwl:hasExactSynonym>Abnormal shape of hindbrain</oboInOwl:hasExactSynonym>
        <oboInOwl:hasExactSynonym rdf:datatype="http://www.w3.org/2001/XMLSchema#string">Abnormality of the hindbrain</oboInOwl:hasExactSynonym>
        <oboInOwl:hasOBONamespace rdf:datatype="http://www.w3.org/2001/XMLSchema#string">human_phenotype</oboInOwl:hasOBONamespace>
        <oboInOwl:id rdf:datatype="http://www.w3.org/2001/XMLSchema#string">HP:0011282</oboInOwl:id>
        <rdfs:comment rdf:datatype="http://www.w3.org/2001/XMLSchema#string">The hindbrain consists of two main structures: The pons and the cerebellum.</rdfs:comment>
        <rdfs:label rdf:datatype="http://www.w3.org/2001/XMLSchema#string">Abnormality of hindbrain morphology</rdfs:label>
    </owl:Class>
    <owl:Axiom>
        <owl:annotatedSource rdf:resource="http://purl.obolibrary.org/obo/HP_0011282"/>
        <owl:annotatedProperty rdf:resource="http://purl.obolibrary.org/obo/IAO_0000115"/>
        <owl:annotatedTarget rdf:datatype="http://www.w3.org/2001/XMLSchema#string">An abnormality of the hindbrain, also known as the rhombencephalon.</owl:annotatedTarget>
        <oboInOwl:hasDbXref rdf:datatype="http://www.w3.org/2001/XMLSchema#string">HPO:probinson</oboInOwl:hasDbXref>
    </owl:Axiom>
    <owl:Axiom>
        <owl:annotatedSource rdf:resource="http://purl.obolibrary.org/obo/HP_0011282"/>
        <owl:annotatedProperty rdf:resource="http://www.geneontology.org/formats/oboInOwl#hasExactSynonym"/>
        <owl:annotatedTarget>Abnormal shape of hindbrain</owl:annotatedTarget>
        <oboInOwl:hasDbXref>orcid.org/0000-0001-5208-3432</oboInOwl:hasDbXref>
        <oboInOwl:hasSynonymType rdf:resource="http://purl.obolibrary.org/obo/hp.owl#layperson"/>
    </owl:Axiom>
    


    <!-- http://purl.obolibrary.org/obo/HP_0011283 -->

    <owl:Class rdf:about="http://purl.obolibrary.org/obo/HP_0011283">
        <rdfs:subClassOf rdf:resource="http://purl.obolibrary.org/obo/HP_0011282"/>
        <obo:IAO_0000115 rdf:datatype="http://www.w3.org/2001/XMLSchema#string">An abnormality of the metencephalon. The metencephalon is the part of the hindbrain that consists of the pons and the cerebellum.</obo:IAO_0000115>
        <oboInOwl:created_by rdf:datatype="http://www.w3.org/2001/XMLSchema#string">peter</oboInOwl:created_by>
        <oboInOwl:creation_date rdf:datatype="http://www.w3.org/2001/XMLSchema#string">2012-01-01T01:24:14Z</oboInOwl:creation_date>
        <oboInOwl:hasDbXref rdf:datatype="http://www.w3.org/2001/XMLSchema#string">UMLS:C4023432</oboInOwl:hasDbXref>
        <oboInOwl:hasOBONamespace rdf:datatype="http://www.w3.org/2001/XMLSchema#string">human_phenotype</oboInOwl:hasOBONamespace>
        <oboInOwl:id rdf:datatype="http://www.w3.org/2001/XMLSchema#string">HP:0011283</oboInOwl:id>
        <rdfs:label rdf:datatype="http://www.w3.org/2001/XMLSchema#string">Abnormality of the metencephalon</rdfs:label>
    </owl:Class>
    <owl:Axiom>
        <owl:annotatedSource rdf:resource="http://purl.obolibrary.org/obo/HP_0011283"/>
        <owl:annotatedProperty rdf:resource="http://purl.obolibrary.org/obo/IAO_0000115"/>
        <owl:annotatedTarget rdf:datatype="http://www.w3.org/2001/XMLSchema#string">An abnormality of the metencephalon. The metencephalon is the part of the hindbrain that consists of the pons and the cerebellum.</owl:annotatedTarget>
        <oboInOwl:hasDbXref rdf:datatype="http://www.w3.org/2001/XMLSchema#string">HPO:probinson</oboInOwl:hasDbXref>
    </owl:Axiom>
    


    <!-- http://purl.obolibrary.org/obo/HP_0011442 -->

    <owl:Class rdf:about="http://purl.obolibrary.org/obo/HP_0011442">
        <rdfs:subClassOf rdf:resource="http://purl.obolibrary.org/obo/HP_0012638"/>
        <obo:IAO_0000115 rdf:datatype="http://www.w3.org/2001/XMLSchema#string">An anomaly of the control or production of movement in the central nervous system.</obo:IAO_0000115>
        <oboInOwl:created_by rdf:datatype="http://www.w3.org/2001/XMLSchema#string">peter</oboInOwl:created_by>
        <oboInOwl:creation_date rdf:datatype="http://www.w3.org/2001/XMLSchema#string">2012-03-18T02:29:04Z</oboInOwl:creation_date>
        <oboInOwl:hasDbXref rdf:datatype="http://www.w3.org/2001/XMLSchema#string">UMLS:C4023354</oboInOwl:hasDbXref>
        <oboInOwl:hasOBONamespace rdf:datatype="http://www.w3.org/2001/XMLSchema#string">human_phenotype</oboInOwl:hasOBONamespace>
        <oboInOwl:id rdf:datatype="http://www.w3.org/2001/XMLSchema#string">HP:0011442</oboInOwl:id>
        <rdfs:label rdf:datatype="http://www.w3.org/2001/XMLSchema#string">Abnormality of central motor function</rdfs:label>
    </owl:Class>
    <owl:Axiom>
        <owl:annotatedSource rdf:resource="http://purl.obolibrary.org/obo/HP_0011442"/>
        <owl:annotatedProperty rdf:resource="http://purl.obolibrary.org/obo/IAO_0000115"/>
        <owl:annotatedTarget rdf:datatype="http://www.w3.org/2001/XMLSchema#string">An anomaly of the control or production of movement in the central nervous system.</owl:annotatedTarget>
        <oboInOwl:hasDbXref rdf:datatype="http://www.w3.org/2001/XMLSchema#string">HPO:probinson</oboInOwl:hasDbXref>
    </owl:Axiom>
    


    <!-- http://purl.obolibrary.org/obo/HP_0011443 -->

    <owl:Class rdf:about="http://purl.obolibrary.org/obo/HP_0011443">
        <rdfs:subClassOf rdf:resource="http://purl.obolibrary.org/obo/HP_0011442"/>
        <oboInOwl:created_by rdf:datatype="http://www.w3.org/2001/XMLSchema#string">peter</oboInOwl:created_by>
        <oboInOwl:creation_date rdf:datatype="http://www.w3.org/2001/XMLSchema#string">2012-03-18T02:40:46Z</oboInOwl:creation_date>
        <oboInOwl:hasDbXref rdf:datatype="http://www.w3.org/2001/XMLSchema#string">UMLS:C4023353</oboInOwl:hasDbXref>
        <oboInOwl:hasExactSynonym rdf:datatype="http://www.w3.org/2001/XMLSchema#string">Abnormality of coordination</oboInOwl:hasExactSynonym>
        <oboInOwl:hasExactSynonym>Coordination issue</oboInOwl:hasExactSynonym>
        <oboInOwl:hasOBONamespace rdf:datatype="http://www.w3.org/2001/XMLSchema#string">human_phenotype</oboInOwl:hasOBONamespace>
        <oboInOwl:id rdf:datatype="http://www.w3.org/2001/XMLSchema#string">HP:0011443</oboInOwl:id>
        <rdfs:label rdf:datatype="http://www.w3.org/2001/XMLSchema#string">Abnormality of coordination</rdfs:label>
    </owl:Class>
    <owl:Axiom>
        <owl:annotatedSource rdf:resource="http://purl.obolibrary.org/obo/HP_0011443"/>
        <owl:annotatedProperty rdf:resource="http://www.geneontology.org/formats/oboInOwl#hasExactSynonym"/>
        <owl:annotatedTarget rdf:datatype="http://www.w3.org/2001/XMLSchema#string">Abnormality of coordination</owl:annotatedTarget>
        <oboInOwl:hasSynonymType rdf:resource="http://purl.obolibrary.org/obo/hp.owl#layperson"/>
    </owl:Axiom>
    <owl:Axiom>
        <owl:annotatedSource rdf:resource="http://purl.obolibrary.org/obo/HP_0011443"/>
        <owl:annotatedProperty rdf:resource="http://www.geneontology.org/formats/oboInOwl#hasExactSynonym"/>
        <owl:annotatedTarget>Coordination issue</owl:annotatedTarget>
        <oboInOwl:hasSynonymType rdf:resource="http://purl.obolibrary.org/obo/hp.owl#layperson"/>
    </owl:Axiom>
    


    <!-- http://purl.obolibrary.org/obo/HP_0011446 -->

    <owl:Class rdf:about="http://purl.obolibrary.org/obo/HP_0011446">
        <rdfs:subClassOf rdf:resource="http://purl.obolibrary.org/obo/HP_0012638"/>
        <obo:IAO_0000115 rdf:datatype="http://www.w3.org/2001/XMLSchema#string">Cognitive, psychiatric or memory anomaly.</obo:IAO_0000115>
        <oboInOwl:created_by rdf:datatype="http://www.w3.org/2001/XMLSchema#string">peter</oboInOwl:created_by>
        <oboInOwl:creation_date rdf:datatype="http://www.w3.org/2001/XMLSchema#string">2012-03-18T04:23:59Z</oboInOwl:creation_date>
        <oboInOwl:hasDbXref rdf:datatype="http://www.w3.org/2001/XMLSchema#string">UMLS:C4023352</oboInOwl:hasDbXref>
        <oboInOwl:hasOBONamespace rdf:datatype="http://www.w3.org/2001/XMLSchema#string">human_phenotype</oboInOwl:hasOBONamespace>
        <oboInOwl:id rdf:datatype="http://www.w3.org/2001/XMLSchema#string">HP:0011446</oboInOwl:id>
        <rdfs:label rdf:datatype="http://www.w3.org/2001/XMLSchema#string">Abnormality of higher mental function</rdfs:label>
    </owl:Class>
    <owl:Axiom>
        <owl:annotatedSource rdf:resource="http://purl.obolibrary.org/obo/HP_0011446"/>
        <owl:annotatedProperty rdf:resource="http://purl.obolibrary.org/obo/IAO_0000115"/>
        <owl:annotatedTarget rdf:datatype="http://www.w3.org/2001/XMLSchema#string">Cognitive, psychiatric or memory anomaly.</owl:annotatedTarget>
        <oboInOwl:hasDbXref rdf:datatype="http://www.w3.org/2001/XMLSchema#string">DDD:ajackson</oboInOwl:hasDbXref>
    </owl:Axiom>
    


    <!-- http://purl.obolibrary.org/obo/HP_0011804 -->

    <owl:Class rdf:about="http://purl.obolibrary.org/obo/HP_0011804">
        <rdfs:subClassOf rdf:resource="http://purl.obolibrary.org/obo/HP_0003011"/>
        <obo:IAO_0000115 rdf:datatype="http://www.w3.org/2001/XMLSchema#string">A functional abnormality of a skeletal muscle.</obo:IAO_0000115>
        <oboInOwl:created_by rdf:datatype="http://www.w3.org/2001/XMLSchema#string">peter</oboInOwl:created_by>
        <oboInOwl:creation_date rdf:datatype="http://www.w3.org/2001/XMLSchema#string">2012-04-25T02:00:15Z</oboInOwl:creation_date>
        <oboInOwl:hasDbXref rdf:datatype="http://www.w3.org/2001/XMLSchema#string">UMLS:C4023182</oboInOwl:hasDbXref>
        <oboInOwl:hasExactSynonym>Issue with muscle function</oboInOwl:hasExactSynonym>
        <oboInOwl:hasOBONamespace rdf:datatype="http://www.w3.org/2001/XMLSchema#string">human_phenotype</oboInOwl:hasOBONamespace>
        <oboInOwl:id rdf:datatype="http://www.w3.org/2001/XMLSchema#string">HP:0011804</oboInOwl:id>
        <rdfs:label rdf:datatype="http://www.w3.org/2001/XMLSchema#string">Abnormality of muscle physiology</rdfs:label>
    </owl:Class>
    <owl:Axiom>
        <owl:annotatedSource rdf:resource="http://purl.obolibrary.org/obo/HP_0011804"/>
        <owl:annotatedProperty rdf:resource="http://purl.obolibrary.org/obo/IAO_0000115"/>
        <owl:annotatedTarget rdf:datatype="http://www.w3.org/2001/XMLSchema#string">A functional abnormality of a skeletal muscle.</owl:annotatedTarget>
        <oboInOwl:hasDbXref rdf:datatype="http://www.w3.org/2001/XMLSchema#string">HPO:probinson</oboInOwl:hasDbXref>
    </owl:Axiom>
    <owl:Axiom>
        <owl:annotatedSource rdf:resource="http://purl.obolibrary.org/obo/HP_0011804"/>
        <owl:annotatedProperty rdf:resource="http://www.geneontology.org/formats/oboInOwl#hasExactSynonym"/>
        <owl:annotatedTarget>Issue with muscle function</owl:annotatedTarget>
        <oboInOwl:hasSynonymType rdf:resource="http://purl.obolibrary.org/obo/hp.owl#layperson"/>
    </owl:Axiom>
    


    <!-- http://purl.obolibrary.org/obo/HP_0012373 -->

    <owl:Class rdf:about="http://purl.obolibrary.org/obo/HP_0012373">
        <rdfs:subClassOf rdf:resource="http://purl.obolibrary.org/obo/HP_0000478"/>
        <obo:IAO_0000115 rdf:datatype="http://www.w3.org/2001/XMLSchema#string">A functional anomaly of the eye.</obo:IAO_0000115>
        <oboInOwl:created_by rdf:datatype="http://www.w3.org/2001/XMLSchema#string">peter</oboInOwl:created_by>
        <oboInOwl:creation_date rdf:datatype="http://www.w3.org/2001/XMLSchema#string">2013-10-13T03:45:37Z</oboInOwl:creation_date>
        <oboInOwl:hasDbXref rdf:datatype="http://www.w3.org/2001/XMLSchema#string">UMLS:C4022924</oboInOwl:hasDbXref>
        <oboInOwl:hasExactSynonym rdf:datatype="http://www.w3.org/2001/XMLSchema#string">Abnormal eye physiology</oboInOwl:hasExactSynonym>
        <oboInOwl:hasOBONamespace rdf:datatype="http://www.w3.org/2001/XMLSchema#string">human_phenotype</oboInOwl:hasOBONamespace>
        <oboInOwl:id rdf:datatype="http://www.w3.org/2001/XMLSchema#string">HP:0012373</oboInOwl:id>
        <rdfs:label rdf:datatype="http://www.w3.org/2001/XMLSchema#string">Abnormal eye physiology</rdfs:label>
    </owl:Class>
    <owl:Axiom>
        <owl:annotatedSource rdf:resource="http://purl.obolibrary.org/obo/HP_0012373"/>
        <owl:annotatedProperty rdf:resource="http://purl.obolibrary.org/obo/IAO_0000115"/>
        <owl:annotatedTarget rdf:datatype="http://www.w3.org/2001/XMLSchema#string">A functional anomaly of the eye.</owl:annotatedTarget>
        <oboInOwl:hasDbXref rdf:datatype="http://www.w3.org/2001/XMLSchema#string">HPO:probinson</oboInOwl:hasDbXref>
    </owl:Axiom>
    <owl:Axiom>
        <owl:annotatedSource rdf:resource="http://purl.obolibrary.org/obo/HP_0012373"/>
        <owl:annotatedProperty rdf:resource="http://www.geneontology.org/formats/oboInOwl#hasExactSynonym"/>
        <owl:annotatedTarget rdf:datatype="http://www.w3.org/2001/XMLSchema#string">Abnormal eye physiology</owl:annotatedTarget>
        <oboInOwl:hasSynonymType rdf:resource="http://purl.obolibrary.org/obo/hp.owl#layperson"/>
    </owl:Axiom>
    


    <!-- http://purl.obolibrary.org/obo/HP_0012389 -->

    <owl:Class rdf:about="http://purl.obolibrary.org/obo/HP_0012389">
        <rdfs:subClassOf rdf:resource="http://purl.obolibrary.org/obo/HP_0001252"/>
        <obo:IAO_0000115 rdf:datatype="http://www.w3.org/2001/XMLSchema#string">Muscular hypotonia of one or more limbs.</obo:IAO_0000115>
        <oboInOwl:created_by rdf:datatype="http://www.w3.org/2001/XMLSchema#string">peter</oboInOwl:created_by>
        <oboInOwl:creation_date rdf:datatype="http://www.w3.org/2001/XMLSchema#string">2013-11-07T07:31:51Z</oboInOwl:creation_date>
        <oboInOwl:hasDbXref rdf:datatype="http://www.w3.org/2001/XMLSchema#string">UMLS:C4022919</oboInOwl:hasDbXref>
        <oboInOwl:hasOBONamespace rdf:datatype="http://www.w3.org/2001/XMLSchema#string">human_phenotype</oboInOwl:hasOBONamespace>
        <oboInOwl:id rdf:datatype="http://www.w3.org/2001/XMLSchema#string">HP:0012389</oboInOwl:id>
        <rdfs:label rdf:datatype="http://www.w3.org/2001/XMLSchema#string">Appendicular hypotonia</rdfs:label>
    </owl:Class>
    <owl:Axiom>
        <owl:annotatedSource rdf:resource="http://purl.obolibrary.org/obo/HP_0012389"/>
        <owl:annotatedProperty rdf:resource="http://purl.obolibrary.org/obo/IAO_0000115"/>
        <owl:annotatedTarget rdf:datatype="http://www.w3.org/2001/XMLSchema#string">Muscular hypotonia of one or more limbs.</owl:annotatedTarget>
        <oboInOwl:hasDbXref rdf:datatype="http://www.w3.org/2001/XMLSchema#string">HPO:probinson</oboInOwl:hasDbXref>
    </owl:Axiom>
    


    <!-- http://purl.obolibrary.org/obo/HP_0012443 -->

    <owl:Class rdf:about="http://purl.obolibrary.org/obo/HP_0012443">
        <rdfs:subClassOf rdf:resource="http://purl.obolibrary.org/obo/HP_0002011"/>
        <obo:IAO_0000115 rdf:datatype="http://www.w3.org/2001/XMLSchema#string">A structural abnormality of the brain, which has as its parts the forebrain, midbrain, and hindbrain.</obo:IAO_0000115>
        <oboInOwl:created_by rdf:datatype="http://www.w3.org/2001/XMLSchema#string">peter</oboInOwl:created_by>
        <oboInOwl:creation_date rdf:datatype="http://www.w3.org/2001/XMLSchema#string">2013-11-23T02:38:00Z</oboInOwl:creation_date>
        <oboInOwl:hasDbXref rdf:datatype="http://www.w3.org/2001/XMLSchema#string">UMLS:C4021085</oboInOwl:hasDbXref>
        <oboInOwl:hasExactSynonym>Abnormal shape of brain</oboInOwl:hasExactSynonym>
        <oboInOwl:hasExactSynonym rdf:datatype="http://www.w3.org/2001/XMLSchema#string">Abnormality of the brain</oboInOwl:hasExactSynonym>
        <oboInOwl:hasOBONamespace rdf:datatype="http://www.w3.org/2001/XMLSchema#string">human_phenotype</oboInOwl:hasOBONamespace>
        <oboInOwl:id rdf:datatype="http://www.w3.org/2001/XMLSchema#string">HP:0012443</oboInOwl:id>
        <rdfs:label rdf:datatype="http://www.w3.org/2001/XMLSchema#string">Abnormality of brain morphology</rdfs:label>
    </owl:Class>
    <owl:Axiom>
        <owl:annotatedSource rdf:resource="http://purl.obolibrary.org/obo/HP_0012443"/>
        <owl:annotatedProperty rdf:resource="http://purl.obolibrary.org/obo/IAO_0000115"/>
        <owl:annotatedTarget rdf:datatype="http://www.w3.org/2001/XMLSchema#string">A structural abnormality of the brain, which has as its parts the forebrain, midbrain, and hindbrain.</owl:annotatedTarget>
        <oboInOwl:hasDbXref rdf:datatype="http://www.w3.org/2001/XMLSchema#string">HPO:probinson</oboInOwl:hasDbXref>
    </owl:Axiom>
    <owl:Axiom>
        <owl:annotatedSource rdf:resource="http://purl.obolibrary.org/obo/HP_0012443"/>
        <owl:annotatedProperty rdf:resource="http://www.geneontology.org/formats/oboInOwl#hasExactSynonym"/>
        <owl:annotatedTarget>Abnormal shape of brain</owl:annotatedTarget>
        <oboInOwl:hasDbXref>orcid.org/0000-0001-5208-3432</oboInOwl:hasDbXref>
        <oboInOwl:hasSynonymType rdf:resource="http://purl.obolibrary.org/obo/hp.owl#layperson"/>
    </owl:Axiom>
    <owl:Axiom>
        <owl:annotatedSource rdf:resource="http://purl.obolibrary.org/obo/HP_0012443"/>
        <owl:annotatedProperty rdf:resource="http://www.geneontology.org/formats/oboInOwl#hasExactSynonym"/>
        <owl:annotatedTarget rdf:datatype="http://www.w3.org/2001/XMLSchema#string">Abnormality of the brain</owl:annotatedTarget>
        <oboInOwl:hasSynonymType rdf:resource="http://purl.obolibrary.org/obo/hp.owl#layperson"/>
    </owl:Axiom>
    


    <!-- http://purl.obolibrary.org/obo/HP_0012547 -->

    <owl:Class rdf:about="http://purl.obolibrary.org/obo/HP_0012547">
        <rdfs:subClassOf rdf:resource="http://purl.obolibrary.org/obo/HP_0000496"/>
        <obo:IAO_0000115 rdf:datatype="http://www.w3.org/2001/XMLSchema#string">Anomalous movements of the eyes that occur without the subject wanting them to happen.</obo:IAO_0000115>
        <oboInOwl:created_by rdf:datatype="http://www.w3.org/2001/XMLSchema#string">peter</oboInOwl:created_by>
        <oboInOwl:creation_date rdf:datatype="http://www.w3.org/2001/XMLSchema#string">2013-12-21T10:37:42Z</oboInOwl:creation_date>
        <oboInOwl:hasDbXref rdf:datatype="http://www.w3.org/2001/XMLSchema#string">UMLS:C4022855</oboInOwl:hasDbXref>
        <oboInOwl:hasOBONamespace rdf:datatype="http://www.w3.org/2001/XMLSchema#string">human_phenotype</oboInOwl:hasOBONamespace>
        <oboInOwl:id rdf:datatype="http://www.w3.org/2001/XMLSchema#string">HP:0012547</oboInOwl:id>
        <rdfs:label rdf:datatype="http://www.w3.org/2001/XMLSchema#string">Abnormal involuntary eye movements</rdfs:label>
    </owl:Class>
    <owl:Axiom>
        <owl:annotatedSource rdf:resource="http://purl.obolibrary.org/obo/HP_0012547"/>
        <owl:annotatedProperty rdf:resource="http://purl.obolibrary.org/obo/IAO_0000115"/>
        <owl:annotatedTarget rdf:datatype="http://www.w3.org/2001/XMLSchema#string">Anomalous movements of the eyes that occur without the subject wanting them to happen.</owl:annotatedTarget>
        <oboInOwl:hasDbXref rdf:datatype="http://www.w3.org/2001/XMLSchema#string">HPO:probinson</oboInOwl:hasDbXref>
    </owl:Axiom>
    


    <!-- http://purl.obolibrary.org/obo/HP_0012638 -->

    <owl:Class rdf:about="http://purl.obolibrary.org/obo/HP_0012638">
        <rdfs:subClassOf rdf:resource="http://purl.obolibrary.org/obo/HP_0000707"/>
        <obo:IAO_0000115 rdf:datatype="http://www.w3.org/2001/XMLSchema#string">A functional anomaly of the nervous system.</obo:IAO_0000115>
        <oboInOwl:created_by rdf:datatype="http://www.w3.org/2001/XMLSchema#string">peter</oboInOwl:created_by>
        <oboInOwl:creation_date rdf:datatype="http://www.w3.org/2001/XMLSchema#string">2014-01-19T08:02:46Z</oboInOwl:creation_date>
        <oboInOwl:hasDbXref rdf:datatype="http://www.w3.org/2001/XMLSchema#string">UMLS:C4022811</oboInOwl:hasDbXref>
        <oboInOwl:hasOBONamespace rdf:datatype="http://www.w3.org/2001/XMLSchema#string">human_phenotype</oboInOwl:hasOBONamespace>
        <oboInOwl:id rdf:datatype="http://www.w3.org/2001/XMLSchema#string">HP:0012638</oboInOwl:id>
        <rdfs:label rdf:datatype="http://www.w3.org/2001/XMLSchema#string">Abnormality of nervous system physiology</rdfs:label>
    </owl:Class>
    <owl:Axiom>
        <owl:annotatedSource rdf:resource="http://purl.obolibrary.org/obo/HP_0012638"/>
        <owl:annotatedProperty rdf:resource="http://purl.obolibrary.org/obo/IAO_0000115"/>
        <owl:annotatedTarget rdf:datatype="http://www.w3.org/2001/XMLSchema#string">A functional anomaly of the nervous system.</owl:annotatedTarget>
        <oboInOwl:hasDbXref rdf:datatype="http://www.w3.org/2001/XMLSchema#string">HPO:probinson</oboInOwl:hasDbXref>
    </owl:Axiom>
    


    <!-- http://purl.obolibrary.org/obo/HP_0012639 -->

    <owl:Class rdf:about="http://purl.obolibrary.org/obo/HP_0012639">
        <rdfs:subClassOf rdf:resource="http://purl.obolibrary.org/obo/HP_0000707"/>
        <obo:IAO_0000115 rdf:datatype="http://www.w3.org/2001/XMLSchema#string">A structural anomaly of the nervous system.</obo:IAO_0000115>
        <oboInOwl:created_by rdf:datatype="http://www.w3.org/2001/XMLSchema#string">peter</oboInOwl:created_by>
        <oboInOwl:creation_date rdf:datatype="http://www.w3.org/2001/XMLSchema#string">2014-01-19T08:03:08Z</oboInOwl:creation_date>
        <oboInOwl:hasDbXref rdf:datatype="http://www.w3.org/2001/XMLSchema#string">UMLS:C4022810</oboInOwl:hasDbXref>
        <oboInOwl:hasExactSynonym>Abnormal nervous system morphology</oboInOwl:hasExactSynonym>
        <oboInOwl:hasExactSynonym>Abnormal shape of nervous system</oboInOwl:hasExactSynonym>
        <oboInOwl:hasOBONamespace rdf:datatype="http://www.w3.org/2001/XMLSchema#string">human_phenotype</oboInOwl:hasOBONamespace>
        <oboInOwl:id rdf:datatype="http://www.w3.org/2001/XMLSchema#string">HP:0012639</oboInOwl:id>
        <rdfs:label rdf:datatype="http://www.w3.org/2001/XMLSchema#string">Abnormality of nervous system morphology</rdfs:label>
    </owl:Class>
    <owl:Axiom>
        <owl:annotatedSource rdf:resource="http://purl.obolibrary.org/obo/HP_0012639"/>
        <owl:annotatedProperty rdf:resource="http://purl.obolibrary.org/obo/IAO_0000115"/>
        <owl:annotatedTarget rdf:datatype="http://www.w3.org/2001/XMLSchema#string">A structural anomaly of the nervous system.</owl:annotatedTarget>
        <oboInOwl:hasDbXref rdf:datatype="http://www.w3.org/2001/XMLSchema#string">HPO:probinson</oboInOwl:hasDbXref>
    </owl:Axiom>
    <owl:Axiom>
        <owl:annotatedSource rdf:resource="http://purl.obolibrary.org/obo/HP_0012639"/>
        <owl:annotatedProperty rdf:resource="http://www.geneontology.org/formats/oboInOwl#hasExactSynonym"/>
        <owl:annotatedTarget>Abnormal nervous system morphology</owl:annotatedTarget>
        <oboInOwl:hasDbXref>orcid.org/0000-0001-5208-3432</oboInOwl:hasDbXref>
    </owl:Axiom>
    <owl:Axiom>
        <owl:annotatedSource rdf:resource="http://purl.obolibrary.org/obo/HP_0012639"/>
        <owl:annotatedProperty rdf:resource="http://www.geneontology.org/formats/oboInOwl#hasExactSynonym"/>
        <owl:annotatedTarget>Abnormal shape of nervous system</owl:annotatedTarget>
        <oboInOwl:hasDbXref>orcid.org/0000-0001-5208-3432</oboInOwl:hasDbXref>
        <oboInOwl:hasSynonymType rdf:resource="http://purl.obolibrary.org/obo/hp.owl#layperson"/>
    </owl:Axiom>
    


    <!-- http://purl.obolibrary.org/obo/HP_0012651 -->

    <owl:Class rdf:about="http://purl.obolibrary.org/obo/HP_0012651">
        <owl:equivalentClass>
            <owl:Class>
                <owl:intersectionOf rdf:parseType="Collection">
                    <rdf:Description rdf:about="http://purl.obolibrary.org/obo/HP_0002066"/>
                    <owl:Restriction>
                        <owl:onProperty rdf:resource="http://purl.obolibrary.org/obo/hp.owl#has_severity"/>
                        <owl:someValuesFrom rdf:resource="http://purl.obolibrary.org/obo/HP_0012829"/>
                    </owl:Restriction>
                </owl:intersectionOf>
            </owl:Class>
        </owl:equivalentClass>
        <rdfs:subClassOf rdf:resource="http://purl.obolibrary.org/obo/HP_0002066"/>
        <obo:IAO_0000115 rdf:datatype="http://www.w3.org/2001/XMLSchema#string">Ay severe form of gait ataxia such that an affected person cannot walk at all.</obo:IAO_0000115>
        <oboInOwl:created_by rdf:datatype="http://www.w3.org/2001/XMLSchema#string">peter</oboInOwl:created_by>
        <oboInOwl:creation_date rdf:datatype="http://www.w3.org/2001/XMLSchema#string">2014-02-06T07:52:50Z</oboInOwl:creation_date>
        <oboInOwl:hasDbXref rdf:datatype="http://www.w3.org/2001/XMLSchema#string">UMLS:C0877217</oboInOwl:hasDbXref>
        <oboInOwl:hasOBONamespace rdf:datatype="http://www.w3.org/2001/XMLSchema#string">human_phenotype</oboInOwl:hasOBONamespace>
        <oboInOwl:id rdf:datatype="http://www.w3.org/2001/XMLSchema#string">HP:0012651</oboInOwl:id>
        <rdfs:label rdf:datatype="http://www.w3.org/2001/XMLSchema#string">Abasia</rdfs:label>
    </owl:Class>
    <owl:Axiom>
        <owl:annotatedSource rdf:resource="http://purl.obolibrary.org/obo/HP_0012651"/>
        <owl:annotatedProperty rdf:resource="http://purl.obolibrary.org/obo/IAO_0000115"/>
        <owl:annotatedTarget rdf:datatype="http://www.w3.org/2001/XMLSchema#string">Ay severe form of gait ataxia such that an affected person cannot walk at all.</owl:annotatedTarget>
        <oboInOwl:hasDbXref rdf:datatype="http://www.w3.org/2001/XMLSchema#string">HPO:probinson</oboInOwl:hasDbXref>
    </owl:Axiom>
    


    <!-- http://purl.obolibrary.org/obo/HP_0012823 -->

    <owl:Class rdf:about="http://purl.obolibrary.org/obo/HP_0012823">
        <rdfs:subClassOf rdf:resource="http://purl.obolibrary.org/obo/HP_0000001"/>
        <obo:IAO_0000115 rdf:datatype="http://www.w3.org/2001/XMLSchema#string">This subontology is designed to provide terms to characterize and specify the phenotypic abnormalities defined in the Phenotypic abnormality subontology, with respect to severity, laterality, age of onset, and other aspects.</obo:IAO_0000115>
        <oboInOwl:created_by rdf:datatype="http://www.w3.org/2001/XMLSchema#string">peter</oboInOwl:created_by>
        <oboInOwl:creation_date rdf:datatype="http://www.w3.org/2001/XMLSchema#string">2014-06-06T06:34:24Z</oboInOwl:creation_date>
        <oboInOwl:hasAlternativeId rdf:datatype="http://www.w3.org/2001/XMLSchema#string">HP:0000004</oboInOwl:hasAlternativeId>
        <oboInOwl:hasDbXref rdf:datatype="http://www.w3.org/2001/XMLSchema#string">UMLS:C4021064</oboInOwl:hasDbXref>
        <oboInOwl:hasExactSynonym rdf:datatype="http://www.w3.org/2001/XMLSchema#string">Phenotypic modifier</oboInOwl:hasExactSynonym>
        <oboInOwl:hasOBONamespace rdf:datatype="http://www.w3.org/2001/XMLSchema#string">human_phenotype</oboInOwl:hasOBONamespace>
        <oboInOwl:id rdf:datatype="http://www.w3.org/2001/XMLSchema#string">HP:0012823</oboInOwl:id>
        <rdfs:comment rdf:datatype="http://www.w3.org/2001/XMLSchema#string">Note that some of the terms, such as Intellectual disability, have children terms such as Severe intellectual disability that represent precomposed combinations of modifiers and phenotypic abnormality terms. This done where the medical community commonly uses these terms with a fixed meaning (for instance, the Intellectual disability terms are used with specific IQ ranges). For computational reasoning, the semantics are intended to be the same as if there was a combination of the phenotype term and the clinical modifier term.</rdfs:comment>
        <rdfs:label rdf:datatype="http://www.w3.org/2001/XMLSchema#string">Clinical modifier</rdfs:label>
    </owl:Class>
    <owl:Axiom>
        <owl:annotatedSource rdf:resource="http://purl.obolibrary.org/obo/HP_0012823"/>
        <owl:annotatedProperty rdf:resource="http://purl.obolibrary.org/obo/IAO_0000115"/>
        <owl:annotatedTarget rdf:datatype="http://www.w3.org/2001/XMLSchema#string">This subontology is designed to provide terms to characterize and specify the phenotypic abnormalities defined in the Phenotypic abnormality subontology, with respect to severity, laterality, age of onset, and other aspects.</owl:annotatedTarget>
        <oboInOwl:hasDbXref rdf:datatype="http://www.w3.org/2001/XMLSchema#string">HPO:probinson</oboInOwl:hasDbXref>
    </owl:Axiom>
    


    <!-- http://purl.obolibrary.org/obo/HP_0012824 -->

    <owl:Class rdf:about="http://purl.obolibrary.org/obo/HP_0012824">
        <rdfs:subClassOf rdf:resource="http://purl.obolibrary.org/obo/HP_0012823"/>
        <obo:IAO_0000115 rdf:datatype="http://www.w3.org/2001/XMLSchema#string">The intensity or degree of a manifestation.</obo:IAO_0000115>
        <oboInOwl:created_by rdf:datatype="http://www.w3.org/2001/XMLSchema#string">peter</oboInOwl:created_by>
        <oboInOwl:creation_date rdf:datatype="http://www.w3.org/2001/XMLSchema#string">2014-06-06T06:39:22Z</oboInOwl:creation_date>
        <oboInOwl:hasDbXref rdf:datatype="http://www.w3.org/2001/XMLSchema#string">SNOMEDCT_US:103370009</oboInOwl:hasDbXref>
        <oboInOwl:hasDbXref rdf:datatype="http://www.w3.org/2001/XMLSchema#string">UMLS:C0522510</oboInOwl:hasDbXref>
        <oboInOwl:hasExactSynonym rdf:datatype="http://www.w3.org/2001/XMLSchema#string">Intensity</oboInOwl:hasExactSynonym>
        <oboInOwl:hasOBONamespace rdf:datatype="http://www.w3.org/2001/XMLSchema#string">human_phenotype</oboInOwl:hasOBONamespace>
        <oboInOwl:id rdf:datatype="http://www.w3.org/2001/XMLSchema#string">HP:0012824</oboInOwl:id>
        <rdfs:comment rdf:datatype="http://www.w3.org/2001/XMLSchema#string">Synonymous with PATO:0000049, intensity.</rdfs:comment>
        <rdfs:label rdf:datatype="http://www.w3.org/2001/XMLSchema#string">Severity</rdfs:label>
    </owl:Class>
    <owl:Axiom>
        <owl:annotatedSource rdf:resource="http://purl.obolibrary.org/obo/HP_0012824"/>
        <owl:annotatedProperty rdf:resource="http://purl.obolibrary.org/obo/IAO_0000115"/>
        <owl:annotatedTarget rdf:datatype="http://www.w3.org/2001/XMLSchema#string">The intensity or degree of a manifestation.</owl:annotatedTarget>
        <oboInOwl:hasDbXref rdf:datatype="http://www.w3.org/2001/XMLSchema#string">HPO:probinson</oboInOwl:hasDbXref>
    </owl:Axiom>
    


    <!-- http://purl.obolibrary.org/obo/HP_0012825 -->

    <owl:Class rdf:about="http://purl.obolibrary.org/obo/HP_0012825">
        <rdfs:subClassOf rdf:resource="http://purl.obolibrary.org/obo/HP_0012824"/>
        <obo:IAO_0000115 rdf:datatype="http://www.w3.org/2001/XMLSchema#string">Having a relatively minor degree of severity. For quantitative traits, a deviation of between two and three standard deviations from the appropriate population mean.</obo:IAO_0000115>
        <oboInOwl:created_by rdf:datatype="http://www.w3.org/2001/XMLSchema#string">peter</oboInOwl:created_by>
        <oboInOwl:creation_date rdf:datatype="http://www.w3.org/2001/XMLSchema#string">2014-06-06T06:41:33Z</oboInOwl:creation_date>
        <oboInOwl:hasDbXref rdf:datatype="http://www.w3.org/2001/XMLSchema#string">SNOMEDCT_US:446411000124101</oboInOwl:hasDbXref>
        <oboInOwl:hasDbXref rdf:datatype="http://www.w3.org/2001/XMLSchema#string">UMLS:C1513302</oboInOwl:hasDbXref>
        <oboInOwl:hasExactSynonym rdf:datatype="http://www.w3.org/2001/XMLSchema#string">Mild</oboInOwl:hasExactSynonym>
        <oboInOwl:hasOBONamespace rdf:datatype="http://www.w3.org/2001/XMLSchema#string">human_phenotype</oboInOwl:hasOBONamespace>
        <oboInOwl:id rdf:datatype="http://www.w3.org/2001/XMLSchema#string">HP:0012825</oboInOwl:id>
        <rdfs:comment rdf:datatype="http://www.w3.org/2001/XMLSchema#string">PATO:0000394, mild.</rdfs:comment>
        <rdfs:label rdf:datatype="http://www.w3.org/2001/XMLSchema#string">Mild</rdfs:label>
    </owl:Class>
    <owl:Axiom>
        <owl:annotatedSource rdf:resource="http://purl.obolibrary.org/obo/HP_0012825"/>
        <owl:annotatedProperty rdf:resource="http://purl.obolibrary.org/obo/IAO_0000115"/>
        <owl:annotatedTarget rdf:datatype="http://www.w3.org/2001/XMLSchema#string">Having a relatively minor degree of severity. For quantitative traits, a deviation of between two and three standard deviations from the appropriate population mean.</owl:annotatedTarget>
        <oboInOwl:hasDbXref rdf:datatype="http://www.w3.org/2001/XMLSchema#string">HPO:probinson</oboInOwl:hasDbXref>
    </owl:Axiom>
    <owl:Axiom>
        <owl:annotatedSource rdf:resource="http://purl.obolibrary.org/obo/HP_0012825"/>
        <owl:annotatedProperty rdf:resource="http://www.geneontology.org/formats/oboInOwl#hasExactSynonym"/>
        <owl:annotatedTarget rdf:datatype="http://www.w3.org/2001/XMLSchema#string">Mild</owl:annotatedTarget>
        <oboInOwl:hasSynonymType rdf:resource="http://purl.obolibrary.org/obo/hp.owl#layperson"/>
    </owl:Axiom>
    


    <!-- http://purl.obolibrary.org/obo/HP_0012826 -->

    <owl:Class rdf:about="http://purl.obolibrary.org/obo/HP_0012826">
        <rdfs:subClassOf rdf:resource="http://purl.obolibrary.org/obo/HP_0012824"/>
        <obo:IAO_0000115 rdf:datatype="http://www.w3.org/2001/XMLSchema#string">Having a medium degree of severity. For quantitative traits, a deviation of between three and four standard deviations from the appropriate population mean.</obo:IAO_0000115>
        <oboInOwl:created_by rdf:datatype="http://www.w3.org/2001/XMLSchema#string">peter</oboInOwl:created_by>
        <oboInOwl:creation_date rdf:datatype="http://www.w3.org/2001/XMLSchema#string">2014-06-06T06:48:12Z</oboInOwl:creation_date>
        <oboInOwl:hasDbXref rdf:datatype="http://www.w3.org/2001/XMLSchema#string">SNOMEDCT_US:446421000124109</oboInOwl:hasDbXref>
        <oboInOwl:hasDbXref rdf:datatype="http://www.w3.org/2001/XMLSchema#string">SNOMEDCT_US:6736007</oboInOwl:hasDbXref>
        <oboInOwl:hasDbXref rdf:datatype="http://www.w3.org/2001/XMLSchema#string">UMLS:C0205081</oboInOwl:hasDbXref>
        <oboInOwl:hasOBONamespace rdf:datatype="http://www.w3.org/2001/XMLSchema#string">human_phenotype</oboInOwl:hasOBONamespace>
        <oboInOwl:id rdf:datatype="http://www.w3.org/2001/XMLSchema#string">HP:0012826</oboInOwl:id>
        <rdfs:comment rdf:datatype="http://www.w3.org/2001/XMLSchema#string">PATO:0000395, moderate.</rdfs:comment>
        <rdfs:label rdf:datatype="http://www.w3.org/2001/XMLSchema#string">Moderate</rdfs:label>
    </owl:Class>
    <owl:Axiom>
        <owl:annotatedSource rdf:resource="http://purl.obolibrary.org/obo/HP_0012826"/>
        <owl:annotatedProperty rdf:resource="http://purl.obolibrary.org/obo/IAO_0000115"/>
        <owl:annotatedTarget rdf:datatype="http://www.w3.org/2001/XMLSchema#string">Having a medium degree of severity. For quantitative traits, a deviation of between three and four standard deviations from the appropriate population mean.</owl:annotatedTarget>
        <oboInOwl:hasDbXref rdf:datatype="http://www.w3.org/2001/XMLSchema#string">HPO:probinson</oboInOwl:hasDbXref>
    </owl:Axiom>
    


    <!-- http://purl.obolibrary.org/obo/HP_0012827 -->

    <owl:Class rdf:about="http://purl.obolibrary.org/obo/HP_0012827">
        <rdfs:subClassOf rdf:resource="http://purl.obolibrary.org/obo/HP_0012824"/>
        <obo:IAO_0000115 rdf:datatype="http://www.w3.org/2001/XMLSchema#string">Having a minor degree of severity that is considered to be on the boundary between the normal and the abnormal ranges. For quantitative traits, a deviation of that is less than two standard deviations from the appropriate population mean.</obo:IAO_0000115>
        <oboInOwl:created_by rdf:datatype="http://www.w3.org/2001/XMLSchema#string">peter</oboInOwl:created_by>
        <oboInOwl:creation_date rdf:datatype="http://www.w3.org/2001/XMLSchema#string">2014-06-06T06:52:16Z</oboInOwl:creation_date>
        <oboInOwl:hasDbXref rdf:datatype="http://www.w3.org/2001/XMLSchema#string">UMLS:C0205189</oboInOwl:hasDbXref>
        <oboInOwl:hasExactSynonym rdf:datatype="http://www.w3.org/2001/XMLSchema#string">Borderline</oboInOwl:hasExactSynonym>
        <oboInOwl:hasOBONamespace rdf:datatype="http://www.w3.org/2001/XMLSchema#string">human_phenotype</oboInOwl:hasOBONamespace>
        <oboInOwl:id rdf:datatype="http://www.w3.org/2001/XMLSchema#string">HP:0012827</oboInOwl:id>
        <rdfs:comment rdf:datatype="http://www.w3.org/2001/XMLSchema#string">PATO:0000394, mild.</rdfs:comment>
        <rdfs:label rdf:datatype="http://www.w3.org/2001/XMLSchema#string">Borderline</rdfs:label>
    </owl:Class>
    <owl:Axiom>
        <owl:annotatedSource rdf:resource="http://purl.obolibrary.org/obo/HP_0012827"/>
        <owl:annotatedProperty rdf:resource="http://purl.obolibrary.org/obo/IAO_0000115"/>
        <owl:annotatedTarget rdf:datatype="http://www.w3.org/2001/XMLSchema#string">Having a minor degree of severity that is considered to be on the boundary between the normal and the abnormal ranges. For quantitative traits, a deviation of that is less than two standard deviations from the appropriate population mean.</owl:annotatedTarget>
        <oboInOwl:hasDbXref rdf:datatype="http://www.w3.org/2001/XMLSchema#string">HPO:probinson</oboInOwl:hasDbXref>
    </owl:Axiom>
    <owl:Axiom>
        <owl:annotatedSource rdf:resource="http://purl.obolibrary.org/obo/HP_0012827"/>
        <owl:annotatedProperty rdf:resource="http://www.geneontology.org/formats/oboInOwl#hasExactSynonym"/>
        <owl:annotatedTarget rdf:datatype="http://www.w3.org/2001/XMLSchema#string">Borderline</owl:annotatedTarget>
        <oboInOwl:hasSynonymType rdf:resource="http://purl.obolibrary.org/obo/hp.owl#layperson"/>
    </owl:Axiom>
    


    <!-- http://purl.obolibrary.org/obo/HP_0012828 -->

    <owl:Class rdf:about="http://purl.obolibrary.org/obo/HP_0012828">
        <rdfs:subClassOf rdf:resource="http://purl.obolibrary.org/obo/HP_0012824"/>
        <obo:IAO_0000115 rdf:datatype="http://www.w3.org/2001/XMLSchema#string">Having a high degree of severity. For quantitative traits, a deviation of between four and five standard deviations from the appropriate population mean.</obo:IAO_0000115>
        <oboInOwl:created_by rdf:datatype="http://www.w3.org/2001/XMLSchema#string">peter</oboInOwl:created_by>
        <oboInOwl:creation_date rdf:datatype="http://www.w3.org/2001/XMLSchema#string">2014-06-06T07:03:17Z</oboInOwl:creation_date>
        <oboInOwl:hasDbXref rdf:datatype="http://www.w3.org/2001/XMLSchema#string">SNOMEDCT_US:24484000</oboInOwl:hasDbXref>
        <oboInOwl:hasDbXref rdf:datatype="http://www.w3.org/2001/XMLSchema#string">UMLS:C0205082</oboInOwl:hasDbXref>
        <oboInOwl:hasExactSynonym rdf:datatype="http://www.w3.org/2001/XMLSchema#string">Severe</oboInOwl:hasExactSynonym>
        <oboInOwl:hasOBONamespace rdf:datatype="http://www.w3.org/2001/XMLSchema#string">human_phenotype</oboInOwl:hasOBONamespace>
        <oboInOwl:id rdf:datatype="http://www.w3.org/2001/XMLSchema#string">HP:0012828</oboInOwl:id>
        <rdfs:comment rdf:datatype="http://www.w3.org/2001/XMLSchema#string">PATO:0000396, severe.</rdfs:comment>
        <rdfs:label rdf:datatype="http://www.w3.org/2001/XMLSchema#string">Severe</rdfs:label>
    </owl:Class>
    <owl:Axiom>
        <owl:annotatedSource rdf:resource="http://purl.obolibrary.org/obo/HP_0012828"/>
        <owl:annotatedProperty rdf:resource="http://purl.obolibrary.org/obo/IAO_0000115"/>
        <owl:annotatedTarget rdf:datatype="http://www.w3.org/2001/XMLSchema#string">Having a high degree of severity. For quantitative traits, a deviation of between four and five standard deviations from the appropriate population mean.</owl:annotatedTarget>
        <oboInOwl:hasDbXref rdf:datatype="http://www.w3.org/2001/XMLSchema#string">HPO:probinson</oboInOwl:hasDbXref>
    </owl:Axiom>
    <owl:Axiom>
        <owl:annotatedSource rdf:resource="http://purl.obolibrary.org/obo/HP_0012828"/>
        <owl:annotatedProperty rdf:resource="http://www.geneontology.org/formats/oboInOwl#hasExactSynonym"/>
        <owl:annotatedTarget rdf:datatype="http://www.w3.org/2001/XMLSchema#string">Severe</owl:annotatedTarget>
        <oboInOwl:hasSynonymType rdf:resource="http://purl.obolibrary.org/obo/hp.owl#layperson"/>
    </owl:Axiom>
    


    <!-- http://purl.obolibrary.org/obo/HP_0012829 -->

    <owl:Class rdf:about="http://purl.obolibrary.org/obo/HP_0012829">
        <rdfs:subClassOf rdf:resource="http://purl.obolibrary.org/obo/HP_0012824"/>
        <obo:IAO_0000115 rdf:datatype="http://www.w3.org/2001/XMLSchema#string">Having an extremely high degree of severity. For quantitative traits, a deviation of more than five standard deviations from the appropriate population mean.</obo:IAO_0000115>
        <oboInOwl:created_by rdf:datatype="http://www.w3.org/2001/XMLSchema#string">peter</oboInOwl:created_by>
        <oboInOwl:creation_date rdf:datatype="http://www.w3.org/2001/XMLSchema#string">2014-06-06T07:05:46Z</oboInOwl:creation_date>
        <oboInOwl:hasDbXref rdf:datatype="http://www.w3.org/2001/XMLSchema#string">SNOMEDCT_US:795002</oboInOwl:hasDbXref>
        <oboInOwl:hasDbXref rdf:datatype="http://www.w3.org/2001/XMLSchema#string">UMLS:C0439808</oboInOwl:hasDbXref>
        <oboInOwl:hasExactSynonym rdf:datatype="http://www.w3.org/2001/XMLSchema#string">Profound</oboInOwl:hasExactSynonym>
        <oboInOwl:hasOBONamespace rdf:datatype="http://www.w3.org/2001/XMLSchema#string">human_phenotype</oboInOwl:hasOBONamespace>
        <oboInOwl:id rdf:datatype="http://www.w3.org/2001/XMLSchema#string">HP:0012829</oboInOwl:id>
        <rdfs:label rdf:datatype="http://www.w3.org/2001/XMLSchema#string">Profound</rdfs:label>
    </owl:Class>
    <owl:Axiom>
        <owl:annotatedSource rdf:resource="http://purl.obolibrary.org/obo/HP_0012829"/>
        <owl:annotatedProperty rdf:resource="http://purl.obolibrary.org/obo/IAO_0000115"/>
        <owl:annotatedTarget rdf:datatype="http://www.w3.org/2001/XMLSchema#string">Having an extremely high degree of severity. For quantitative traits, a deviation of more than five standard deviations from the appropriate population mean.</owl:annotatedTarget>
        <oboInOwl:hasDbXref rdf:datatype="http://www.w3.org/2001/XMLSchema#string">HPO:probinson</oboInOwl:hasDbXref>
    </owl:Axiom>
    <owl:Axiom>
        <owl:annotatedSource rdf:resource="http://purl.obolibrary.org/obo/HP_0012829"/>
        <owl:annotatedProperty rdf:resource="http://www.geneontology.org/formats/oboInOwl#hasExactSynonym"/>
        <owl:annotatedTarget rdf:datatype="http://www.w3.org/2001/XMLSchema#string">Profound</owl:annotatedTarget>
        <oboInOwl:hasSynonymType rdf:resource="http://purl.obolibrary.org/obo/hp.owl#layperson"/>
    </owl:Axiom>
    


    <!-- http://purl.obolibrary.org/obo/HP_0030147 -->

    <owl:Class rdf:about="http://purl.obolibrary.org/obo/HP_0030147">
        <rdfs:subClassOf rdf:resource="http://purl.obolibrary.org/obo/HP_0030187"/>
        <obo:IAO_0000115>Tremor of the trunk in an anterior-posterior plane at 3-4 Hz.</obo:IAO_0000115>
        <oboInOwl:hasDbXref rdf:datatype="http://www.w3.org/2001/XMLSchema#string">UMLS:C2674512</oboInOwl:hasDbXref>
        <rdfs:label>Truncal titubation</rdfs:label>
    </owl:Class>
    <owl:Axiom>
        <owl:annotatedSource rdf:resource="http://purl.obolibrary.org/obo/HP_0030147"/>
        <owl:annotatedProperty rdf:resource="http://purl.obolibrary.org/obo/IAO_0000115"/>
        <owl:annotatedTarget>Tremor of the trunk in an anterior-posterior plane at 3-4 Hz.</owl:annotatedTarget>
        <oboInOwl:hasDbXref>HPO:probinson</oboInOwl:hasDbXref>
    </owl:Axiom>
    


    <!-- http://purl.obolibrary.org/obo/HP_0030186 -->

    <owl:Class rdf:about="http://purl.obolibrary.org/obo/HP_0030186">
        <rdfs:subClassOf rdf:resource="http://purl.obolibrary.org/obo/HP_0002345"/>
        <obo:IAO_0000115>Tremor that occurs during any voluntary movement. It may include visually or non-visually guided movements. Tremor during target directed movement is called intention tremor.</obo:IAO_0000115>
        <oboInOwl:hasDbXref rdf:datatype="http://www.w3.org/2001/XMLSchema#string">MSH:D014202</oboInOwl:hasDbXref>
        <oboInOwl:hasDbXref rdf:datatype="http://www.w3.org/2001/XMLSchema#string">MSH:D020329</oboInOwl:hasDbXref>
        <oboInOwl:hasDbXref rdf:datatype="http://www.w3.org/2001/XMLSchema#string">SNOMEDCT_US:30721006</oboInOwl:hasDbXref>
        <oboInOwl:hasDbXref rdf:datatype="http://www.w3.org/2001/XMLSchema#string">SNOMEDCT_US:609558009</oboInOwl:hasDbXref>
        <oboInOwl:hasDbXref rdf:datatype="http://www.w3.org/2001/XMLSchema#string">UMLS:C0234376</oboInOwl:hasDbXref>
        <oboInOwl:hasDbXref rdf:datatype="http://www.w3.org/2001/XMLSchema#string">UMLS:C0270736</oboInOwl:hasDbXref>
        <oboInOwl:hasExactSynonym>Essential tremor</oboInOwl:hasExactSynonym>
        <rdfs:label>Kinetic tremor</rdfs:label>
    </owl:Class>
    <owl:Axiom>
        <owl:annotatedSource rdf:resource="http://purl.obolibrary.org/obo/HP_0030186"/>
        <owl:annotatedProperty rdf:resource="http://www.geneontology.org/formats/oboInOwl#hasExactSynonym"/>
        <owl:annotatedTarget>Essential tremor</owl:annotatedTarget>
        <oboInOwl:hasDbXref>orcid.org/0000-0001-6908-9849</oboInOwl:hasDbXref>
    </owl:Axiom>
    


    <!-- http://purl.obolibrary.org/obo/HP_0030187 -->

    <owl:Class rdf:about="http://purl.obolibrary.org/obo/HP_0030187">
        <rdfs:subClassOf rdf:resource="http://purl.obolibrary.org/obo/HP_0002345"/>
        <obo:IAO_0000115>Nodding movement of the head or body.</obo:IAO_0000115>
        <oboInOwl:hasDbXref rdf:datatype="http://www.w3.org/2001/XMLSchema#string">SNOMEDCT_US:78691002</oboInOwl:hasDbXref>
        <oboInOwl:hasDbXref rdf:datatype="http://www.w3.org/2001/XMLSchema#string">UMLS:C0231690</oboInOwl:hasDbXref>
        <rdfs:label>Titubation</rdfs:label>
    </owl:Class>
    <owl:Axiom>
        <owl:annotatedSource rdf:resource="http://purl.obolibrary.org/obo/HP_0030187"/>
        <owl:annotatedProperty rdf:resource="http://purl.obolibrary.org/obo/IAO_0000115"/>
        <owl:annotatedTarget>Nodding movement of the head or body.</owl:annotatedTarget>
        <oboInOwl:hasDbXref>HPO:probinson</oboInOwl:hasDbXref>
        <oboInOwl:hasDbXref>pmid:4821687</oboInOwl:hasDbXref>
    </owl:Axiom>
    


    <!-- http://purl.obolibrary.org/obo/HP_0100022 -->

    <owl:Class rdf:about="http://purl.obolibrary.org/obo/HP_0100022">
        <rdfs:subClassOf rdf:resource="http://purl.obolibrary.org/obo/HP_0012638"/>
        <obo:IAO_0000115 rdf:datatype="http://www.w3.org/2001/XMLSchema#string">An abnormality of movement with a neurological basis characterized by changes in coordination and speed of voluntary movements.</obo:IAO_0000115>
        <oboInOwl:created_by rdf:datatype="http://www.w3.org/2001/XMLSchema#string">doelkens</oboInOwl:created_by>
        <oboInOwl:creation_date rdf:datatype="http://www.w3.org/2001/XMLSchema#string">2010-05-28T11:48:50Z</oboInOwl:creation_date>
        <oboInOwl:hasAlternativeId rdf:datatype="http://www.w3.org/2001/XMLSchema#string">HP:0001294</oboInOwl:hasAlternativeId>
        <oboInOwl:hasDbXref rdf:datatype="http://www.w3.org/2001/XMLSchema#string">MSH:D009069</oboInOwl:hasDbXref>
        <oboInOwl:hasDbXref rdf:datatype="http://www.w3.org/2001/XMLSchema#string">SNOMEDCT_US:60342002</oboInOwl:hasDbXref>
        <oboInOwl:hasDbXref rdf:datatype="http://www.w3.org/2001/XMLSchema#string">UMLS:C0026650</oboInOwl:hasDbXref>
        <oboInOwl:hasExactSynonym rdf:datatype="http://www.w3.org/2001/XMLSchema#string">Abnormality of movement</oboInOwl:hasExactSynonym>
        <oboInOwl:hasExactSynonym rdf:datatype="http://www.w3.org/2001/XMLSchema#string">Movement disorder</oboInOwl:hasExactSynonym>
        <oboInOwl:hasExactSynonym>Unusual movement</oboInOwl:hasExactSynonym>
        <oboInOwl:hasOBONamespace rdf:datatype="http://www.w3.org/2001/XMLSchema#string">human_phenotype</oboInOwl:hasOBONamespace>
        <oboInOwl:id rdf:datatype="http://www.w3.org/2001/XMLSchema#string">HP:0100022</oboInOwl:id>
        <rdfs:comment rdf:datatype="http://www.w3.org/2001/XMLSchema#string">Movement disorders are characterized by the phenotypic abnormalities including abnormal involuntary movements, akathisia, akinesia, athetosis, ataxia, ballismus, bradykinesia, chorea, dyskinesia, dystonia, and myoclonus tics, tremor, spasms, and stereotypy.</rdfs:comment>
        <rdfs:label rdf:datatype="http://www.w3.org/2001/XMLSchema#string">Abnormality of movement</rdfs:label>
    </owl:Class>
    <owl:Axiom>
        <owl:annotatedSource rdf:resource="http://purl.obolibrary.org/obo/HP_0100022"/>
        <owl:annotatedProperty rdf:resource="http://purl.obolibrary.org/obo/IAO_0000115"/>
        <owl:annotatedTarget rdf:datatype="http://www.w3.org/2001/XMLSchema#string">An abnormality of movement with a neurological basis characterized by changes in coordination and speed of voluntary movements.</owl:annotatedTarget>
        <oboInOwl:hasDbXref rdf:datatype="http://www.w3.org/2001/XMLSchema#string">HPO:probinson</oboInOwl:hasDbXref>
    </owl:Axiom>
    <owl:Axiom>
        <owl:annotatedSource rdf:resource="http://purl.obolibrary.org/obo/HP_0100022"/>
        <owl:annotatedProperty rdf:resource="http://www.geneontology.org/formats/oboInOwl#hasExactSynonym"/>
        <owl:annotatedTarget rdf:datatype="http://www.w3.org/2001/XMLSchema#string">Abnormality of movement</owl:annotatedTarget>
        <oboInOwl:hasSynonymType rdf:resource="http://purl.obolibrary.org/obo/hp.owl#layperson"/>
    </owl:Axiom>
    <owl:Axiom>
        <owl:annotatedSource rdf:resource="http://purl.obolibrary.org/obo/HP_0100022"/>
        <owl:annotatedProperty rdf:resource="http://www.geneontology.org/formats/oboInOwl#hasExactSynonym"/>
        <owl:annotatedTarget rdf:datatype="http://www.w3.org/2001/XMLSchema#string">Movement disorder</owl:annotatedTarget>
        <oboInOwl:hasSynonymType rdf:resource="http://purl.obolibrary.org/obo/hp.owl#layperson"/>
    </owl:Axiom>
    <owl:Axiom>
        <owl:annotatedSource rdf:resource="http://purl.obolibrary.org/obo/HP_0100022"/>
        <owl:annotatedProperty rdf:resource="http://www.geneontology.org/formats/oboInOwl#hasExactSynonym"/>
        <owl:annotatedTarget>Unusual movement</owl:annotatedTarget>
        <oboInOwl:hasSynonymType rdf:resource="http://purl.obolibrary.org/obo/hp.owl#layperson"/>
    </owl:Axiom>
    


    <!-- http://purl.obolibrary.org/obo/hp.owl#Astasia -->

    <owl:Class rdf:about="http://purl.obolibrary.org/obo/hp.owl#Astasia">
        <owl:equivalentClass>
            <owl:Class>
                <owl:intersectionOf rdf:parseType="Collection">
                    <rdf:Description rdf:about="http://purl.obolibrary.org/obo/hp.owl#Standing_instability"/>
                    <owl:Restriction>
                        <owl:onProperty rdf:resource="http://purl.obolibrary.org/obo/hp.owl#has_severity"/>
                        <owl:someValuesFrom rdf:resource="http://purl.obolibrary.org/obo/HP_0012829"/>
                    </owl:Restriction>
                </owl:intersectionOf>
            </owl:Class>
        </owl:equivalentClass>
        <rdfs:subClassOf rdf:resource="http://purl.obolibrary.org/obo/hp.owl#Standing_instability"/>
    </owl:Class>
    


    <!-- http://purl.obolibrary.org/obo/hp.owl#Borderline_dysarthria -->

    <owl:Class rdf:about="http://purl.obolibrary.org/obo/hp.owl#Borderline_dysarthria">
        <owl:equivalentClass>
            <owl:Class>
                <owl:intersectionOf rdf:parseType="Collection">
                    <rdf:Description rdf:about="http://purl.obolibrary.org/obo/HP_0001260"/>
                    <owl:Restriction>
                        <owl:onProperty rdf:resource="http://purl.obolibrary.org/obo/hp.owl#has_severity"/>
                        <owl:someValuesFrom rdf:resource="http://purl.obolibrary.org/obo/HP_0012827"/>
                    </owl:Restriction>
                </owl:intersectionOf>
            </owl:Class>
        </owl:equivalentClass>
        <rdfs:subClassOf rdf:resource="http://purl.obolibrary.org/obo/HP_0001260"/>
    </owl:Class>
    


    <!-- http://purl.obolibrary.org/obo/hp.owl#Borderline_sitting_imbalance -->

    <owl:Class rdf:about="http://purl.obolibrary.org/obo/hp.owl#Borderline_sitting_imbalance">
        <owl:equivalentClass>
            <owl:Class>
                <owl:intersectionOf rdf:parseType="Collection">
                    <rdf:Description rdf:about="http://purl.obolibrary.org/obo/hp.owl#Sitting_imbalance"/>
                    <owl:Restriction>
                        <owl:onProperty rdf:resource="http://purl.obolibrary.org/obo/hp.owl#has_severity"/>
                        <owl:someValuesFrom rdf:resource="http://purl.obolibrary.org/obo/HP_0012827"/>
                    </owl:Restriction>
                </owl:intersectionOf>
            </owl:Class>
        </owl:equivalentClass>
        <rdfs:subClassOf rdf:resource="http://purl.obolibrary.org/obo/hp.owl#Sitting_imbalance"/>
    </owl:Class>
    


    <!-- http://purl.obolibrary.org/obo/hp.owl#Borderline_standing_instability -->

    <owl:Class rdf:about="http://purl.obolibrary.org/obo/hp.owl#Borderline_standing_instability">
        <owl:equivalentClass>
            <owl:Class>
                <owl:intersectionOf rdf:parseType="Collection">
                    <rdf:Description rdf:about="http://purl.obolibrary.org/obo/hp.owl#Standing_instability"/>
                    <owl:Restriction>
                        <owl:onProperty rdf:resource="http://purl.obolibrary.org/obo/hp.owl#has_severity"/>
                        <owl:someValuesFrom rdf:resource="http://purl.obolibrary.org/obo/HP_0012827"/>
                    </owl:Restriction>
                </owl:intersectionOf>
            </owl:Class>
        </owl:equivalentClass>
        <rdfs:subClassOf rdf:resource="http://purl.obolibrary.org/obo/hp.owl#Standing_instability"/>
    </owl:Class>
    


    <!-- http://purl.obolibrary.org/obo/hp.owl#Left_dysdiadochokinesis -->

    <owl:Class rdf:about="http://purl.obolibrary.org/obo/hp.owl#Left_dysdiadochokinesis">
        <rdfs:subClassOf rdf:resource="http://purl.obolibrary.org/obo/HP_0002075"/>
    </owl:Class>
    


    <!-- http://purl.obolibrary.org/obo/hp.owl#Left_intention_tremor -->

    <owl:Class rdf:about="http://purl.obolibrary.org/obo/hp.owl#Left_intention_tremor">
        <rdfs:subClassOf rdf:resource="http://purl.obolibrary.org/obo/HP_0002080"/>
    </owl:Class>
    


    <!-- http://purl.obolibrary.org/obo/hp.owl#Left_lower_limb_dysmetria -->

    <owl:Class rdf:about="http://purl.obolibrary.org/obo/hp.owl#Left_lower_limb_dysmetria">
        <rdfs:subClassOf rdf:resource="http://purl.obolibrary.org/obo/HP_0002406"/>
    </owl:Class>
    


    <!-- http://purl.obolibrary.org/obo/hp.owl#Left_upper_limb_dysmetria -->

    <owl:Class rdf:about="http://purl.obolibrary.org/obo/hp.owl#Left_upper_limb_dysmetria">
        <rdfs:subClassOf rdf:resource="http://purl.obolibrary.org/obo/HP_0002406"/>
    </owl:Class>
    


    <!-- http://purl.obolibrary.org/obo/hp.owl#Mild_dysarthria -->

    <owl:Class rdf:about="http://purl.obolibrary.org/obo/hp.owl#Mild_dysarthria">
        <owl:equivalentClass>
            <owl:Class>
                <owl:intersectionOf rdf:parseType="Collection">
                    <rdf:Description rdf:about="http://purl.obolibrary.org/obo/HP_0001260"/>
                    <owl:Restriction>
                        <owl:onProperty rdf:resource="http://purl.obolibrary.org/obo/hp.owl#has_severity"/>
                        <owl:someValuesFrom rdf:resource="http://purl.obolibrary.org/obo/HP_0012825"/>
                    </owl:Restriction>
                </owl:intersectionOf>
            </owl:Class>
        </owl:equivalentClass>
        <rdfs:subClassOf rdf:resource="http://purl.obolibrary.org/obo/HP_0001260"/>
    </owl:Class>
    


    <!-- http://purl.obolibrary.org/obo/hp.owl#Mild_left_dysdiadochokinesis -->

    <owl:Class rdf:about="http://purl.obolibrary.org/obo/hp.owl#Mild_left_dysdiadochokinesis">
        <owl:equivalentClass>
            <owl:Class>
                <owl:intersectionOf rdf:parseType="Collection">
                    <rdf:Description rdf:about="http://purl.obolibrary.org/obo/hp.owl#Left_dysdiadochokinesis"/>
                    <owl:Restriction>
                        <owl:onProperty rdf:resource="http://purl.obolibrary.org/obo/hp.owl#has_severity"/>
                        <owl:someValuesFrom rdf:resource="http://purl.obolibrary.org/obo/HP_0012825"/>
                    </owl:Restriction>
                </owl:intersectionOf>
            </owl:Class>
        </owl:equivalentClass>
        <rdfs:subClassOf rdf:resource="http://purl.obolibrary.org/obo/hp.owl#Left_dysdiadochokinesis"/>
    </owl:Class>
    


    <!-- http://purl.obolibrary.org/obo/hp.owl#Mild_left_intention_tremor -->

    <owl:Class rdf:about="http://purl.obolibrary.org/obo/hp.owl#Mild_left_intention_tremor">
        <owl:equivalentClass>
            <owl:Class>
                <owl:intersectionOf rdf:parseType="Collection">
                    <rdf:Description rdf:about="http://purl.obolibrary.org/obo/hp.owl#Left_intention_tremor"/>
                    <owl:Restriction>
                        <owl:onProperty rdf:resource="http://purl.obolibrary.org/obo/hp.owl#has_severity"/>
                        <owl:someValuesFrom rdf:resource="http://purl.obolibrary.org/obo/HP_0012825"/>
                    </owl:Restriction>
                </owl:intersectionOf>
            </owl:Class>
        </owl:equivalentClass>
        <rdfs:subClassOf rdf:resource="http://purl.obolibrary.org/obo/hp.owl#Left_intention_tremor"/>
    </owl:Class>
    


    <!-- http://purl.obolibrary.org/obo/hp.owl#Mild_left_lower_limb_dysmetria -->

    <owl:Class rdf:about="http://purl.obolibrary.org/obo/hp.owl#Mild_left_lower_limb_dysmetria">
        <owl:equivalentClass>
            <owl:Class>
                <owl:intersectionOf rdf:parseType="Collection">
                    <rdf:Description rdf:about="http://purl.obolibrary.org/obo/hp.owl#Left_lower_limb_dysmetria"/>
                    <owl:Restriction>
                        <owl:onProperty rdf:resource="http://purl.obolibrary.org/obo/hp.owl#has_severity"/>
                        <owl:someValuesFrom rdf:resource="http://purl.obolibrary.org/obo/HP_0012825"/>
                    </owl:Restriction>
                </owl:intersectionOf>
            </owl:Class>
        </owl:equivalentClass>
        <rdfs:subClassOf rdf:resource="http://purl.obolibrary.org/obo/hp.owl#Left_lower_limb_dysmetria"/>
    </owl:Class>
    


    <!-- http://purl.obolibrary.org/obo/hp.owl#Mild_left_upper_limb_dysmetria -->

    <owl:Class rdf:about="http://purl.obolibrary.org/obo/hp.owl#Mild_left_upper_limb_dysmetria">
        <owl:equivalentClass>
            <owl:Class>
                <owl:intersectionOf rdf:parseType="Collection">
                    <rdf:Description rdf:about="http://purl.obolibrary.org/obo/hp.owl#Left_upper_limb_dysmetria"/>
                    <owl:Restriction>
                        <owl:onProperty rdf:resource="http://purl.obolibrary.org/obo/hp.owl#has_severity"/>
                        <owl:someValuesFrom rdf:resource="http://purl.obolibrary.org/obo/HP_0012825"/>
                    </owl:Restriction>
                </owl:intersectionOf>
            </owl:Class>
        </owl:equivalentClass>
        <rdfs:subClassOf rdf:resource="http://purl.obolibrary.org/obo/hp.owl#Left_upper_limb_dysmetria"/>
    </owl:Class>
    


    <!-- http://purl.obolibrary.org/obo/hp.owl#Mild_right_dysdiadochokinesis -->

    <owl:Class rdf:about="http://purl.obolibrary.org/obo/hp.owl#Mild_right_dysdiadochokinesis">
        <owl:equivalentClass>
            <owl:Class>
                <owl:intersectionOf rdf:parseType="Collection">
                    <rdf:Description rdf:about="http://purl.obolibrary.org/obo/hp.owl#Right_dysdiadochokinesis"/>
                    <owl:Restriction>
                        <owl:onProperty rdf:resource="http://purl.obolibrary.org/obo/hp.owl#has_severity"/>
                        <owl:someValuesFrom rdf:resource="http://purl.obolibrary.org/obo/HP_0012825"/>
                    </owl:Restriction>
                </owl:intersectionOf>
            </owl:Class>
        </owl:equivalentClass>
        <rdfs:subClassOf rdf:resource="http://purl.obolibrary.org/obo/hp.owl#Right_dysdiadochokinesis"/>
    </owl:Class>
    


    <!-- http://purl.obolibrary.org/obo/hp.owl#Mild_right_intention_tremor -->

    <owl:Class rdf:about="http://purl.obolibrary.org/obo/hp.owl#Mild_right_intention_tremor">
        <owl:equivalentClass>
            <owl:Class>
                <owl:intersectionOf rdf:parseType="Collection">
                    <rdf:Description rdf:about="http://purl.obolibrary.org/obo/hp.owl#Right_intention_tremor"/>
                    <owl:Restriction>
                        <owl:onProperty rdf:resource="http://purl.obolibrary.org/obo/hp.owl#has_severity"/>
                        <owl:someValuesFrom rdf:resource="http://purl.obolibrary.org/obo/HP_0012825"/>
                    </owl:Restriction>
                </owl:intersectionOf>
            </owl:Class>
        </owl:equivalentClass>
        <rdfs:subClassOf rdf:resource="http://purl.obolibrary.org/obo/hp.owl#Right_intention_tremor"/>
    </owl:Class>
    


    <!-- http://purl.obolibrary.org/obo/hp.owl#Mild_right_lower_limb_dysmetria -->

    <owl:Class rdf:about="http://purl.obolibrary.org/obo/hp.owl#Mild_right_lower_limb_dysmetria">
        <owl:equivalentClass>
            <owl:Class>
                <owl:intersectionOf rdf:parseType="Collection">
                    <rdf:Description rdf:about="http://purl.obolibrary.org/obo/hp.owl#Right_lower_limb_dysmetria"/>
                    <owl:Restriction>
                        <owl:onProperty rdf:resource="http://purl.obolibrary.org/obo/hp.owl#has_severity"/>
                        <owl:someValuesFrom rdf:resource="http://purl.obolibrary.org/obo/HP_0012825"/>
                    </owl:Restriction>
                </owl:intersectionOf>
            </owl:Class>
        </owl:equivalentClass>
        <rdfs:subClassOf rdf:resource="http://purl.obolibrary.org/obo/hp.owl#Right_lower_limb_dysmetria"/>
    </owl:Class>
    


    <!-- http://purl.obolibrary.org/obo/hp.owl#Mild_right_upper_limb_dysmetria -->

    <owl:Class rdf:about="http://purl.obolibrary.org/obo/hp.owl#Mild_right_upper_limb_dysmetria">
        <owl:equivalentClass>
            <owl:Class>
                <owl:intersectionOf rdf:parseType="Collection">
                    <rdf:Description rdf:about="http://purl.obolibrary.org/obo/hp.owl#Right_upper_limb_dysmetria"/>
                    <owl:Restriction>
                        <owl:onProperty rdf:resource="http://purl.obolibrary.org/obo/hp.owl#has_severity"/>
                        <owl:someValuesFrom rdf:resource="http://purl.obolibrary.org/obo/HP_0012825"/>
                    </owl:Restriction>
                </owl:intersectionOf>
            </owl:Class>
        </owl:equivalentClass>
        <rdfs:subClassOf rdf:resource="http://purl.obolibrary.org/obo/hp.owl#Right_upper_limb_dysmetria"/>
    </owl:Class>
    


    <!-- http://purl.obolibrary.org/obo/hp.owl#Mild_sitting_imbalance -->

    <owl:Class rdf:about="http://purl.obolibrary.org/obo/hp.owl#Mild_sitting_imbalance">
        <owl:equivalentClass>
            <owl:Class>
                <owl:intersectionOf rdf:parseType="Collection">
                    <rdf:Description rdf:about="http://purl.obolibrary.org/obo/hp.owl#Sitting_imbalance"/>
                    <owl:Restriction>
                        <owl:onProperty rdf:resource="http://purl.obolibrary.org/obo/hp.owl#has_severity"/>
                        <owl:someValuesFrom rdf:resource="http://purl.obolibrary.org/obo/HP_0012825"/>
                    </owl:Restriction>
                </owl:intersectionOf>
            </owl:Class>
        </owl:equivalentClass>
        <rdfs:subClassOf rdf:resource="http://purl.obolibrary.org/obo/hp.owl#Sitting_imbalance"/>
    </owl:Class>
    


    <!-- http://purl.obolibrary.org/obo/hp.owl#Mild_standing_instability -->

    <owl:Class rdf:about="http://purl.obolibrary.org/obo/hp.owl#Mild_standing_instability">
        <owl:equivalentClass>
            <owl:Class>
                <owl:intersectionOf rdf:parseType="Collection">
                    <rdf:Description rdf:about="http://purl.obolibrary.org/obo/hp.owl#Standing_instability"/>
                    <owl:Restriction>
                        <owl:onProperty rdf:resource="http://purl.obolibrary.org/obo/hp.owl#has_severity"/>
                        <owl:someValuesFrom rdf:resource="http://purl.obolibrary.org/obo/HP_0012825"/>
                    </owl:Restriction>
                </owl:intersectionOf>
            </owl:Class>
        </owl:equivalentClass>
        <rdfs:subClassOf rdf:resource="http://purl.obolibrary.org/obo/hp.owl#Standing_instability"/>
    </owl:Class>
    


    <!-- http://purl.obolibrary.org/obo/hp.owl#Moderate_dysarthria -->

    <owl:Class rdf:about="http://purl.obolibrary.org/obo/hp.owl#Moderate_dysarthria">
        <owl:equivalentClass>
            <owl:Class>
                <owl:intersectionOf rdf:parseType="Collection">
                    <rdf:Description rdf:about="http://purl.obolibrary.org/obo/HP_0001260"/>
                    <owl:Restriction>
                        <owl:onProperty rdf:resource="http://purl.obolibrary.org/obo/hp.owl#has_severity"/>
                        <owl:someValuesFrom rdf:resource="http://purl.obolibrary.org/obo/HP_0012826"/>
                    </owl:Restriction>
                </owl:intersectionOf>
            </owl:Class>
        </owl:equivalentClass>
        <rdfs:subClassOf rdf:resource="http://purl.obolibrary.org/obo/HP_0001260"/>
    </owl:Class>
    


    <!-- http://purl.obolibrary.org/obo/hp.owl#Moderate_left_dysdiadochokinesis -->

    <owl:Class rdf:about="http://purl.obolibrary.org/obo/hp.owl#Moderate_left_dysdiadochokinesis">
        <owl:equivalentClass>
            <owl:Class>
                <owl:intersectionOf rdf:parseType="Collection">
                    <rdf:Description rdf:about="http://purl.obolibrary.org/obo/hp.owl#Left_dysdiadochokinesis"/>
                    <owl:Restriction>
                        <owl:onProperty rdf:resource="http://purl.obolibrary.org/obo/hp.owl#has_severity"/>
                        <owl:someValuesFrom rdf:resource="http://purl.obolibrary.org/obo/HP_0012826"/>
                    </owl:Restriction>
                </owl:intersectionOf>
            </owl:Class>
        </owl:equivalentClass>
        <rdfs:subClassOf rdf:resource="http://purl.obolibrary.org/obo/hp.owl#Left_dysdiadochokinesis"/>
    </owl:Class>
    


    <!-- http://purl.obolibrary.org/obo/hp.owl#Moderate_left_intention_tremor -->

    <owl:Class rdf:about="http://purl.obolibrary.org/obo/hp.owl#Moderate_left_intention_tremor">
        <owl:equivalentClass>
            <owl:Class>
                <owl:intersectionOf rdf:parseType="Collection">
                    <rdf:Description rdf:about="http://purl.obolibrary.org/obo/hp.owl#Left_intention_tremor"/>
                    <owl:Restriction>
                        <owl:onProperty rdf:resource="http://purl.obolibrary.org/obo/hp.owl#has_severity"/>
                        <owl:someValuesFrom rdf:resource="http://purl.obolibrary.org/obo/HP_0012826"/>
                    </owl:Restriction>
                </owl:intersectionOf>
            </owl:Class>
        </owl:equivalentClass>
        <rdfs:subClassOf rdf:resource="http://purl.obolibrary.org/obo/hp.owl#Left_intention_tremor"/>
    </owl:Class>
    


    <!-- http://purl.obolibrary.org/obo/hp.owl#Moderate_left_lower_limb_dysmetria -->

    <owl:Class rdf:about="http://purl.obolibrary.org/obo/hp.owl#Moderate_left_lower_limb_dysmetria">
        <owl:equivalentClass>
            <owl:Class>
                <owl:intersectionOf rdf:parseType="Collection">
                    <rdf:Description rdf:about="http://purl.obolibrary.org/obo/hp.owl#Left_lower_limb_dysmetria"/>
                    <owl:Restriction>
                        <owl:onProperty rdf:resource="http://purl.obolibrary.org/obo/hp.owl#has_severity"/>
                        <owl:someValuesFrom rdf:resource="http://purl.obolibrary.org/obo/HP_0012826"/>
                    </owl:Restriction>
                </owl:intersectionOf>
            </owl:Class>
        </owl:equivalentClass>
        <rdfs:subClassOf rdf:resource="http://purl.obolibrary.org/obo/hp.owl#Left_lower_limb_dysmetria"/>
    </owl:Class>
    


    <!-- http://purl.obolibrary.org/obo/hp.owl#Moderate_left_upper_limb_dysmetria -->

    <owl:Class rdf:about="http://purl.obolibrary.org/obo/hp.owl#Moderate_left_upper_limb_dysmetria">
        <owl:equivalentClass>
            <owl:Class>
                <owl:intersectionOf rdf:parseType="Collection">
                    <rdf:Description rdf:about="http://purl.obolibrary.org/obo/hp.owl#Left_upper_limb_dysmetria"/>
                    <owl:Restriction>
                        <owl:onProperty rdf:resource="http://purl.obolibrary.org/obo/hp.owl#has_severity"/>
                        <owl:someValuesFrom rdf:resource="http://purl.obolibrary.org/obo/HP_0012826"/>
                    </owl:Restriction>
                </owl:intersectionOf>
            </owl:Class>
        </owl:equivalentClass>
        <rdfs:subClassOf rdf:resource="http://purl.obolibrary.org/obo/hp.owl#Left_upper_limb_dysmetria"/>
    </owl:Class>
    


    <!-- http://purl.obolibrary.org/obo/hp.owl#Moderate_right_dysdiadochokinesis -->

    <owl:Class rdf:about="http://purl.obolibrary.org/obo/hp.owl#Moderate_right_dysdiadochokinesis">
        <owl:equivalentClass>
            <owl:Class>
                <owl:intersectionOf rdf:parseType="Collection">
                    <rdf:Description rdf:about="http://purl.obolibrary.org/obo/hp.owl#Right_dysdiadochokinesis"/>
                    <owl:Restriction>
                        <owl:onProperty rdf:resource="http://purl.obolibrary.org/obo/hp.owl#has_severity"/>
                        <owl:someValuesFrom rdf:resource="http://purl.obolibrary.org/obo/HP_0012826"/>
                    </owl:Restriction>
                </owl:intersectionOf>
            </owl:Class>
        </owl:equivalentClass>
        <rdfs:subClassOf rdf:resource="http://purl.obolibrary.org/obo/hp.owl#Right_dysdiadochokinesis"/>
    </owl:Class>
    


    <!-- http://purl.obolibrary.org/obo/hp.owl#Moderate_right_intention_tremor -->

    <owl:Class rdf:about="http://purl.obolibrary.org/obo/hp.owl#Moderate_right_intention_tremor">
        <owl:equivalentClass>
            <owl:Class>
                <owl:intersectionOf rdf:parseType="Collection">
                    <rdf:Description rdf:about="http://purl.obolibrary.org/obo/hp.owl#Right_intention_tremor"/>
                    <owl:Restriction>
                        <owl:onProperty rdf:resource="http://purl.obolibrary.org/obo/hp.owl#has_severity"/>
                        <owl:someValuesFrom rdf:resource="http://purl.obolibrary.org/obo/HP_0012826"/>
                    </owl:Restriction>
                </owl:intersectionOf>
            </owl:Class>
        </owl:equivalentClass>
        <rdfs:subClassOf rdf:resource="http://purl.obolibrary.org/obo/hp.owl#Right_intention_tremor"/>
    </owl:Class>
    


    <!-- http://purl.obolibrary.org/obo/hp.owl#Moderate_right_lower_limb_dysmetria -->

    <owl:Class rdf:about="http://purl.obolibrary.org/obo/hp.owl#Moderate_right_lower_limb_dysmetria">
        <owl:equivalentClass>
            <owl:Class>
                <owl:intersectionOf rdf:parseType="Collection">
                    <rdf:Description rdf:about="http://purl.obolibrary.org/obo/hp.owl#Right_lower_limb_dysmetria"/>
                    <owl:Restriction>
                        <owl:onProperty rdf:resource="http://purl.obolibrary.org/obo/hp.owl#has_severity"/>
                        <owl:someValuesFrom rdf:resource="http://purl.obolibrary.org/obo/HP_0012826"/>
                    </owl:Restriction>
                </owl:intersectionOf>
            </owl:Class>
        </owl:equivalentClass>
        <rdfs:subClassOf rdf:resource="http://purl.obolibrary.org/obo/hp.owl#Right_lower_limb_dysmetria"/>
    </owl:Class>
    


    <!-- http://purl.obolibrary.org/obo/hp.owl#Moderate_right_upper_limb_dysmetria -->

    <owl:Class rdf:about="http://purl.obolibrary.org/obo/hp.owl#Moderate_right_upper_limb_dysmetria">
        <owl:equivalentClass>
            <owl:Class>
                <owl:intersectionOf rdf:parseType="Collection">
                    <rdf:Description rdf:about="http://purl.obolibrary.org/obo/hp.owl#Right_upper_limb_dysmetria"/>
                    <owl:Restriction>
                        <owl:onProperty rdf:resource="http://purl.obolibrary.org/obo/hp.owl#has_severity"/>
                        <owl:someValuesFrom rdf:resource="http://purl.obolibrary.org/obo/HP_0012826"/>
                    </owl:Restriction>
                </owl:intersectionOf>
            </owl:Class>
        </owl:equivalentClass>
        <rdfs:subClassOf rdf:resource="http://purl.obolibrary.org/obo/hp.owl#Right_upper_limb_dysmetria"/>
    </owl:Class>
    


    <!-- http://purl.obolibrary.org/obo/hp.owl#Moderate_sitting_imbalance -->

    <owl:Class rdf:about="http://purl.obolibrary.org/obo/hp.owl#Moderate_sitting_imbalance">
        <owl:equivalentClass>
            <owl:Class>
                <owl:intersectionOf rdf:parseType="Collection">
                    <rdf:Description rdf:about="http://purl.obolibrary.org/obo/hp.owl#Sitting_imbalance"/>
                    <owl:Restriction>
                        <owl:onProperty rdf:resource="http://purl.obolibrary.org/obo/hp.owl#has_severity"/>
                        <owl:someValuesFrom rdf:resource="http://purl.obolibrary.org/obo/HP_0012826"/>
                    </owl:Restriction>
                </owl:intersectionOf>
            </owl:Class>
        </owl:equivalentClass>
        <rdfs:subClassOf rdf:resource="http://purl.obolibrary.org/obo/hp.owl#Sitting_imbalance"/>
    </owl:Class>
    


    <!-- http://purl.obolibrary.org/obo/hp.owl#Moderate_standing_instability -->

    <owl:Class rdf:about="http://purl.obolibrary.org/obo/hp.owl#Moderate_standing_instability">
        <owl:equivalentClass>
            <owl:Class>
                <owl:intersectionOf rdf:parseType="Collection">
                    <rdf:Description rdf:about="http://purl.obolibrary.org/obo/hp.owl#Standing_instability"/>
                    <owl:Restriction>
                        <owl:onProperty rdf:resource="http://purl.obolibrary.org/obo/hp.owl#has_severity"/>
                        <owl:someValuesFrom rdf:resource="http://purl.obolibrary.org/obo/HP_0012826"/>
                    </owl:Restriction>
                </owl:intersectionOf>
            </owl:Class>
        </owl:equivalentClass>
        <rdfs:subClassOf rdf:resource="http://purl.obolibrary.org/obo/hp.owl#Standing_instability"/>
    </owl:Class>
    


    <!-- http://purl.obolibrary.org/obo/hp.owl#Right_dysdiadochokinesis -->

    <owl:Class rdf:about="http://purl.obolibrary.org/obo/hp.owl#Right_dysdiadochokinesis">
        <rdfs:subClassOf rdf:resource="http://purl.obolibrary.org/obo/HP_0002075"/>
    </owl:Class>
    


    <!-- http://purl.obolibrary.org/obo/hp.owl#Right_intention_tremor -->

    <owl:Class rdf:about="http://purl.obolibrary.org/obo/hp.owl#Right_intention_tremor">
        <rdfs:subClassOf rdf:resource="http://purl.obolibrary.org/obo/HP_0002080"/>
    </owl:Class>
    


    <!-- http://purl.obolibrary.org/obo/hp.owl#Right_lower_limb_dysmetria -->

    <owl:Class rdf:about="http://purl.obolibrary.org/obo/hp.owl#Right_lower_limb_dysmetria">
        <rdfs:subClassOf rdf:resource="http://purl.obolibrary.org/obo/HP_0002406"/>
    </owl:Class>
    


    <!-- http://purl.obolibrary.org/obo/hp.owl#Right_upper_limb_dysmetria -->

    <owl:Class rdf:about="http://purl.obolibrary.org/obo/hp.owl#Right_upper_limb_dysmetria">
        <rdfs:subClassOf rdf:resource="http://purl.obolibrary.org/obo/HP_0002406"/>
    </owl:Class>
    


    <!-- http://purl.obolibrary.org/obo/hp.owl#Severe_dysarthria -->

    <owl:Class rdf:about="http://purl.obolibrary.org/obo/hp.owl#Severe_dysarthria">
        <owl:equivalentClass>
            <owl:Class>
                <owl:intersectionOf rdf:parseType="Collection">
                    <rdf:Description rdf:about="http://purl.obolibrary.org/obo/HP_0001260"/>
                    <owl:Restriction>
                        <owl:onProperty rdf:resource="http://purl.obolibrary.org/obo/hp.owl#has_severity"/>
                        <owl:someValuesFrom rdf:resource="http://purl.obolibrary.org/obo/HP_0012828"/>
                    </owl:Restriction>
                </owl:intersectionOf>
            </owl:Class>
        </owl:equivalentClass>
        <rdfs:subClassOf rdf:resource="http://purl.obolibrary.org/obo/HP_0001260"/>
    </owl:Class>
    


    <!-- http://purl.obolibrary.org/obo/hp.owl#Severe_left_dysdiadochokinesis -->

    <owl:Class rdf:about="http://purl.obolibrary.org/obo/hp.owl#Severe_left_dysdiadochokinesis">
        <owl:equivalentClass>
            <owl:Class>
                <owl:intersectionOf rdf:parseType="Collection">
                    <rdf:Description rdf:about="http://purl.obolibrary.org/obo/hp.owl#Left_dysdiadochokinesis"/>
                    <owl:Restriction>
                        <owl:onProperty rdf:resource="http://purl.obolibrary.org/obo/hp.owl#has_severity"/>
                        <owl:someValuesFrom rdf:resource="http://purl.obolibrary.org/obo/HP_0012828"/>
                    </owl:Restriction>
                </owl:intersectionOf>
            </owl:Class>
        </owl:equivalentClass>
        <rdfs:subClassOf rdf:resource="http://purl.obolibrary.org/obo/hp.owl#Left_dysdiadochokinesis"/>
    </owl:Class>
    


    <!-- http://purl.obolibrary.org/obo/hp.owl#Severe_left_intention_tremor -->

    <owl:Class rdf:about="http://purl.obolibrary.org/obo/hp.owl#Severe_left_intention_tremor">
        <owl:equivalentClass>
            <owl:Class>
                <owl:intersectionOf rdf:parseType="Collection">
                    <rdf:Description rdf:about="http://purl.obolibrary.org/obo/hp.owl#Left_intention_tremor"/>
                    <owl:Restriction>
                        <owl:onProperty rdf:resource="http://purl.obolibrary.org/obo/hp.owl#has_severity"/>
                        <owl:someValuesFrom rdf:resource="http://purl.obolibrary.org/obo/HP_0012828"/>
                    </owl:Restriction>
                </owl:intersectionOf>
            </owl:Class>
        </owl:equivalentClass>
        <rdfs:subClassOf rdf:resource="http://purl.obolibrary.org/obo/hp.owl#Left_intention_tremor"/>
    </owl:Class>
    


    <!-- http://purl.obolibrary.org/obo/hp.owl#Severe_left_lower_limb_dysmetria -->

    <owl:Class rdf:about="http://purl.obolibrary.org/obo/hp.owl#Severe_left_lower_limb_dysmetria">
        <owl:equivalentClass>
            <owl:Class>
                <owl:intersectionOf rdf:parseType="Collection">
                    <rdf:Description rdf:about="http://purl.obolibrary.org/obo/hp.owl#Left_lower_limb_dysmetria"/>
                    <owl:Restriction>
                        <owl:onProperty rdf:resource="http://purl.obolibrary.org/obo/hp.owl#has_severity"/>
                        <owl:someValuesFrom rdf:resource="http://purl.obolibrary.org/obo/HP_0012828"/>
                    </owl:Restriction>
                </owl:intersectionOf>
            </owl:Class>
        </owl:equivalentClass>
        <rdfs:subClassOf rdf:resource="http://purl.obolibrary.org/obo/hp.owl#Left_lower_limb_dysmetria"/>
    </owl:Class>
    


    <!-- http://purl.obolibrary.org/obo/hp.owl#Severe_left_upper_limb_dysmetria -->

    <owl:Class rdf:about="http://purl.obolibrary.org/obo/hp.owl#Severe_left_upper_limb_dysmetria">
        <owl:equivalentClass>
            <owl:Class>
                <owl:intersectionOf rdf:parseType="Collection">
                    <rdf:Description rdf:about="http://purl.obolibrary.org/obo/hp.owl#Left_upper_limb_dysmetria"/>
                    <owl:Restriction>
                        <owl:onProperty rdf:resource="http://purl.obolibrary.org/obo/hp.owl#has_severity"/>
                        <owl:someValuesFrom rdf:resource="http://purl.obolibrary.org/obo/HP_0012828"/>
                    </owl:Restriction>
                </owl:intersectionOf>
            </owl:Class>
        </owl:equivalentClass>
        <rdfs:subClassOf rdf:resource="http://purl.obolibrary.org/obo/hp.owl#Left_upper_limb_dysmetria"/>
    </owl:Class>
    


    <!-- http://purl.obolibrary.org/obo/hp.owl#Severe_right_dysdiadochokinesis -->

    <owl:Class rdf:about="http://purl.obolibrary.org/obo/hp.owl#Severe_right_dysdiadochokinesis">
        <owl:equivalentClass>
            <owl:Class>
                <owl:intersectionOf rdf:parseType="Collection">
                    <rdf:Description rdf:about="http://purl.obolibrary.org/obo/hp.owl#Right_dysdiadochokinesis"/>
                    <owl:Restriction>
                        <owl:onProperty rdf:resource="http://purl.obolibrary.org/obo/hp.owl#has_severity"/>
                        <owl:someValuesFrom rdf:resource="http://purl.obolibrary.org/obo/HP_0012828"/>
                    </owl:Restriction>
                </owl:intersectionOf>
            </owl:Class>
        </owl:equivalentClass>
        <rdfs:subClassOf rdf:resource="http://purl.obolibrary.org/obo/hp.owl#Right_dysdiadochokinesis"/>
    </owl:Class>
    


    <!-- http://purl.obolibrary.org/obo/hp.owl#Severe_right_intention_tremor -->

    <owl:Class rdf:about="http://purl.obolibrary.org/obo/hp.owl#Severe_right_intention_tremor">
        <owl:equivalentClass>
            <owl:Class>
                <owl:intersectionOf rdf:parseType="Collection">
                    <rdf:Description rdf:about="http://purl.obolibrary.org/obo/hp.owl#Right_intention_tremor"/>
                    <owl:Restriction>
                        <owl:onProperty rdf:resource="http://purl.obolibrary.org/obo/hp.owl#has_severity"/>
                        <owl:someValuesFrom rdf:resource="http://purl.obolibrary.org/obo/HP_0012828"/>
                    </owl:Restriction>
                </owl:intersectionOf>
            </owl:Class>
        </owl:equivalentClass>
        <rdfs:subClassOf rdf:resource="http://purl.obolibrary.org/obo/hp.owl#Right_intention_tremor"/>
    </owl:Class>
    


    <!-- http://purl.obolibrary.org/obo/hp.owl#Severe_right_lower_limb_dysmetria -->

    <owl:Class rdf:about="http://purl.obolibrary.org/obo/hp.owl#Severe_right_lower_limb_dysmetria">
        <owl:equivalentClass>
            <owl:Class>
                <owl:intersectionOf rdf:parseType="Collection">
                    <rdf:Description rdf:about="http://purl.obolibrary.org/obo/hp.owl#Right_lower_limb_dysmetria"/>
                    <owl:Restriction>
                        <owl:onProperty rdf:resource="http://purl.obolibrary.org/obo/hp.owl#has_severity"/>
                        <owl:someValuesFrom rdf:resource="http://purl.obolibrary.org/obo/HP_0012828"/>
                    </owl:Restriction>
                </owl:intersectionOf>
            </owl:Class>
        </owl:equivalentClass>
        <rdfs:subClassOf rdf:resource="http://purl.obolibrary.org/obo/hp.owl#Right_lower_limb_dysmetria"/>
    </owl:Class>
    


    <!-- http://purl.obolibrary.org/obo/hp.owl#Severe_right_upper_limb_dysmetria -->

    <owl:Class rdf:about="http://purl.obolibrary.org/obo/hp.owl#Severe_right_upper_limb_dysmetria">
        <owl:equivalentClass>
            <owl:Class>
                <owl:intersectionOf rdf:parseType="Collection">
                    <rdf:Description rdf:about="http://purl.obolibrary.org/obo/hp.owl#Right_upper_limb_dysmetria"/>
                    <owl:Restriction>
                        <owl:onProperty rdf:resource="http://purl.obolibrary.org/obo/hp.owl#has_severity"/>
                        <owl:someValuesFrom rdf:resource="http://purl.obolibrary.org/obo/HP_0012828"/>
                    </owl:Restriction>
                </owl:intersectionOf>
            </owl:Class>
        </owl:equivalentClass>
        <rdfs:subClassOf rdf:resource="http://purl.obolibrary.org/obo/hp.owl#Right_upper_limb_dysmetria"/>
    </owl:Class>
    


    <!-- http://purl.obolibrary.org/obo/hp.owl#Severe_sitting_imbalance -->

    <owl:Class rdf:about="http://purl.obolibrary.org/obo/hp.owl#Severe_sitting_imbalance">
        <owl:equivalentClass>
            <owl:Class>
                <owl:intersectionOf rdf:parseType="Collection">
                    <rdf:Description rdf:about="http://purl.obolibrary.org/obo/hp.owl#Sitting_imbalance"/>
                    <owl:Restriction>
                        <owl:onProperty rdf:resource="http://purl.obolibrary.org/obo/hp.owl#has_severity"/>
                        <owl:someValuesFrom rdf:resource="http://purl.obolibrary.org/obo/HP_0012828"/>
                    </owl:Restriction>
                </owl:intersectionOf>
            </owl:Class>
        </owl:equivalentClass>
        <rdfs:subClassOf rdf:resource="http://purl.obolibrary.org/obo/hp.owl#Sitting_imbalance"/>
    </owl:Class>
    


    <!-- http://purl.obolibrary.org/obo/hp.owl#Severe_standing_instability -->

    <owl:Class rdf:about="http://purl.obolibrary.org/obo/hp.owl#Severe_standing_instability">
        <owl:equivalentClass>
            <owl:Class>
                <owl:intersectionOf rdf:parseType="Collection">
                    <rdf:Description rdf:about="http://purl.obolibrary.org/obo/hp.owl#Standing_instability"/>
                    <owl:Restriction>
                        <owl:onProperty rdf:resource="http://purl.obolibrary.org/obo/hp.owl#has_severity"/>
                        <owl:someValuesFrom rdf:resource="http://purl.obolibrary.org/obo/HP_0012828"/>
                    </owl:Restriction>
                </owl:intersectionOf>
            </owl:Class>
        </owl:equivalentClass>
        <rdfs:subClassOf rdf:resource="http://purl.obolibrary.org/obo/hp.owl#Standing_instability"/>
    </owl:Class>
    


    <!-- http://purl.obolibrary.org/obo/hp.owl#Sitting_imbalance -->

    <owl:Class rdf:about="http://purl.obolibrary.org/obo/hp.owl#Sitting_imbalance">
        <rdfs:subClassOf rdf:resource="http://purl.obolibrary.org/obo/HP_0002078"/>
    </owl:Class>
    


    <!-- http://purl.obolibrary.org/obo/hp.owl#Standing_instability -->

    <owl:Class rdf:about="http://purl.obolibrary.org/obo/hp.owl#Standing_instability">
        <rdfs:subClassOf rdf:resource="http://purl.obolibrary.org/obo/HP_0002078"/>
    </owl:Class>
    


    <!-- http://purl.obolibrary.org/obo/hp.owl#borderline_gait_ataxia -->

    <owl:Class rdf:about="http://purl.obolibrary.org/obo/hp.owl#borderline_gait_ataxia">
        <owl:equivalentClass>
            <owl:Class>
                <owl:intersectionOf rdf:parseType="Collection">
                    <rdf:Description rdf:about="http://purl.obolibrary.org/obo/HP_0002066"/>
                    <owl:Restriction>
                        <owl:onProperty rdf:resource="http://purl.obolibrary.org/obo/hp.owl#has_severity"/>
                        <owl:someValuesFrom rdf:resource="http://purl.obolibrary.org/obo/HP_0012827"/>
                    </owl:Restriction>
                </owl:intersectionOf>
            </owl:Class>
        </owl:equivalentClass>
        <rdfs:subClassOf rdf:resource="http://purl.obolibrary.org/obo/HP_0002066"/>
    </owl:Class>
    


    <!-- http://purl.obolibrary.org/obo/hp.owl#mild_gait_ataxia -->

    <owl:Class rdf:about="http://purl.obolibrary.org/obo/hp.owl#mild_gait_ataxia">
        <owl:equivalentClass>
            <owl:Class>
                <owl:intersectionOf rdf:parseType="Collection">
                    <rdf:Description rdf:about="http://purl.obolibrary.org/obo/HP_0002066"/>
                    <owl:Restriction>
                        <owl:onProperty rdf:resource="http://purl.obolibrary.org/obo/hp.owl#has_severity"/>
                        <owl:someValuesFrom rdf:resource="http://purl.obolibrary.org/obo/HP_0012825"/>
                    </owl:Restriction>
                </owl:intersectionOf>
            </owl:Class>
        </owl:equivalentClass>
        <rdfs:subClassOf rdf:resource="http://purl.obolibrary.org/obo/HP_0002066"/>
    </owl:Class>
    


    <!-- http://purl.obolibrary.org/obo/hp.owl#moderate_gait_ataxia -->

    <owl:Class rdf:about="http://purl.obolibrary.org/obo/hp.owl#moderate_gait_ataxia">
        <owl:equivalentClass>
            <owl:Class>
                <owl:intersectionOf rdf:parseType="Collection">
                    <rdf:Description rdf:about="http://purl.obolibrary.org/obo/HP_0002066"/>
                    <owl:Restriction>
                        <owl:onProperty rdf:resource="http://purl.obolibrary.org/obo/hp.owl#has_severity"/>
                        <owl:someValuesFrom rdf:resource="http://purl.obolibrary.org/obo/HP_0012826"/>
                    </owl:Restriction>
                </owl:intersectionOf>
            </owl:Class>
        </owl:equivalentClass>
        <rdfs:subClassOf rdf:resource="http://purl.obolibrary.org/obo/HP_0002066"/>
    </owl:Class>
    


    <!-- http://purl.obolibrary.org/obo/hp.owl#severe_gait_ataxia -->

    <owl:Class rdf:about="http://purl.obolibrary.org/obo/hp.owl#severe_gait_ataxia">
        <owl:equivalentClass>
            <owl:Class>
                <owl:intersectionOf rdf:parseType="Collection">
                    <rdf:Description rdf:about="http://purl.obolibrary.org/obo/HP_0002066"/>
                    <owl:Restriction>
                        <owl:onProperty rdf:resource="http://purl.obolibrary.org/obo/hp.owl#has_severity"/>
                        <owl:someValuesFrom rdf:resource="http://purl.obolibrary.org/obo/HP_0012828"/>
                    </owl:Restriction>
                </owl:intersectionOf>
            </owl:Class>
        </owl:equivalentClass>
        <rdfs:subClassOf rdf:resource="http://purl.obolibrary.org/obo/HP_0002066"/>
    </owl:Class>
    


    <!-- 
    ///////////////////////////////////////////////////////////////////////////////////////
    //
    // General axioms
    //
    ///////////////////////////////////////////////////////////////////////////////////////
     -->

    <rdf:Description>
        <rdf:type rdf:resource="http://www.w3.org/2002/07/owl#AllDisjointClasses"/>
        <owl:members rdf:parseType="Collection">
            <rdf:Description rdf:about="http://purl.obolibrary.org/obo/HP_0002425"/>
            <rdf:Description rdf:about="http://purl.obolibrary.org/obo/hp.owl#Borderline_dysarthria"/>
            <rdf:Description rdf:about="http://purl.obolibrary.org/obo/hp.owl#Mild_dysarthria"/>
            <rdf:Description rdf:about="http://purl.obolibrary.org/obo/hp.owl#Moderate_dysarthria"/>
            <rdf:Description rdf:about="http://purl.obolibrary.org/obo/hp.owl#Severe_dysarthria"/>
        </owl:members>
    </rdf:Description>
    <rdf:Description>
        <rdf:type rdf:resource="http://www.w3.org/2002/07/owl#AllDisjointClasses"/>
        <owl:members rdf:parseType="Collection">
            <rdf:Description rdf:about="http://purl.obolibrary.org/obo/HP_0012651"/>
            <rdf:Description rdf:about="http://purl.obolibrary.org/obo/hp.owl#borderline_gait_ataxia"/>
            <rdf:Description rdf:about="http://purl.obolibrary.org/obo/hp.owl#mild_gait_ataxia"/>
            <rdf:Description rdf:about="http://purl.obolibrary.org/obo/hp.owl#moderate_gait_ataxia"/>
            <rdf:Description rdf:about="http://purl.obolibrary.org/obo/hp.owl#severe_gait_ataxia"/>
        </owl:members>
    </rdf:Description>
    <rdf:Description>
        <rdf:type rdf:resource="http://www.w3.org/2002/07/owl#AllDisjointClasses"/>
        <owl:members rdf:parseType="Collection">
            <rdf:Description rdf:about="http://purl.obolibrary.org/obo/HP_0012825"/>
            <rdf:Description rdf:about="http://purl.obolibrary.org/obo/HP_0012826"/>
            <rdf:Description rdf:about="http://purl.obolibrary.org/obo/HP_0012827"/>
            <rdf:Description rdf:about="http://purl.obolibrary.org/obo/HP_0012828"/>
            <rdf:Description rdf:about="http://purl.obolibrary.org/obo/HP_0012829"/>
        </owl:members>
    </rdf:Description>
    <rdf:Description>
        <rdf:type rdf:resource="http://www.w3.org/2002/07/owl#AllDisjointClasses"/>
        <owl:members rdf:parseType="Collection">
            <rdf:Description rdf:about="http://purl.obolibrary.org/obo/hp.owl#Astasia"/>
            <rdf:Description rdf:about="http://purl.obolibrary.org/obo/hp.owl#Borderline_standing_instability"/>
            <rdf:Description rdf:about="http://purl.obolibrary.org/obo/hp.owl#Mild_standing_instability"/>
            <rdf:Description rdf:about="http://purl.obolibrary.org/obo/hp.owl#Moderate_standing_instability"/>
            <rdf:Description rdf:about="http://purl.obolibrary.org/obo/hp.owl#Severe_standing_instability"/>
        </owl:members>
    </rdf:Description>
    <rdf:Description>
        <rdf:type rdf:resource="http://www.w3.org/2002/07/owl#AllDisjointClasses"/>
        <owl:members rdf:parseType="Collection">
            <rdf:Description rdf:about="http://purl.obolibrary.org/obo/hp.owl#Borderline_sitting_imbalance"/>
            <rdf:Description rdf:about="http://purl.obolibrary.org/obo/hp.owl#Mild_sitting_imbalance"/>
            <rdf:Description rdf:about="http://purl.obolibrary.org/obo/hp.owl#Moderate_sitting_imbalance"/>
            <rdf:Description rdf:about="http://purl.obolibrary.org/obo/hp.owl#Severe_sitting_imbalance"/>
        </owl:members>
    </rdf:Description>
    <rdf:Description>
        <rdf:type rdf:resource="http://www.w3.org/2002/07/owl#AllDisjointClasses"/>
        <owl:members rdf:parseType="Collection">
            <rdf:Description rdf:about="http://purl.obolibrary.org/obo/hp.owl#Mild_left_dysdiadochokinesis"/>
            <rdf:Description rdf:about="http://purl.obolibrary.org/obo/hp.owl#Moderate_left_dysdiadochokinesis"/>
            <rdf:Description rdf:about="http://purl.obolibrary.org/obo/hp.owl#Severe_left_dysdiadochokinesis"/>
        </owl:members>
    </rdf:Description>
    <rdf:Description>
        <rdf:type rdf:resource="http://www.w3.org/2002/07/owl#AllDisjointClasses"/>
        <owl:members rdf:parseType="Collection">
            <rdf:Description rdf:about="http://purl.obolibrary.org/obo/hp.owl#Mild_left_intention_tremor"/>
            <rdf:Description rdf:about="http://purl.obolibrary.org/obo/hp.owl#Moderate_left_intention_tremor"/>
            <rdf:Description rdf:about="http://purl.obolibrary.org/obo/hp.owl#Severe_left_intention_tremor"/>
        </owl:members>
    </rdf:Description>
    <rdf:Description>
        <rdf:type rdf:resource="http://www.w3.org/2002/07/owl#AllDisjointClasses"/>
        <owl:members rdf:parseType="Collection">
            <rdf:Description rdf:about="http://purl.obolibrary.org/obo/hp.owl#Mild_left_lower_limb_dysmetria"/>
            <rdf:Description rdf:about="http://purl.obolibrary.org/obo/hp.owl#Moderate_left_lower_limb_dysmetria"/>
            <rdf:Description rdf:about="http://purl.obolibrary.org/obo/hp.owl#Severe_left_lower_limb_dysmetria"/>
        </owl:members>
    </rdf:Description>
    <rdf:Description>
        <rdf:type rdf:resource="http://www.w3.org/2002/07/owl#AllDisjointClasses"/>
        <owl:members rdf:parseType="Collection">
            <rdf:Description rdf:about="http://purl.obolibrary.org/obo/hp.owl#Mild_left_upper_limb_dysmetria"/>
            <rdf:Description rdf:about="http://purl.obolibrary.org/obo/hp.owl#Moderate_left_upper_limb_dysmetria"/>
            <rdf:Description rdf:about="http://purl.obolibrary.org/obo/hp.owl#Severe_left_upper_limb_dysmetria"/>
        </owl:members>
    </rdf:Description>
    <rdf:Description>
        <rdf:type rdf:resource="http://www.w3.org/2002/07/owl#AllDisjointClasses"/>
        <owl:members rdf:parseType="Collection">
            <rdf:Description rdf:about="http://purl.obolibrary.org/obo/hp.owl#Mild_right_dysdiadochokinesis"/>
            <rdf:Description rdf:about="http://purl.obolibrary.org/obo/hp.owl#Moderate_right_dysdiadochokinesis"/>
            <rdf:Description rdf:about="http://purl.obolibrary.org/obo/hp.owl#Severe_right_dysdiadochokinesis"/>
        </owl:members>
    </rdf:Description>
    <rdf:Description>
        <rdf:type rdf:resource="http://www.w3.org/2002/07/owl#AllDisjointClasses"/>
        <owl:members rdf:parseType="Collection">
            <rdf:Description rdf:about="http://purl.obolibrary.org/obo/hp.owl#Mild_right_intention_tremor"/>
            <rdf:Description rdf:about="http://purl.obolibrary.org/obo/hp.owl#Moderate_right_intention_tremor"/>
            <rdf:Description rdf:about="http://purl.obolibrary.org/obo/hp.owl#Severe_right_intention_tremor"/>
        </owl:members>
    </rdf:Description>
    <rdf:Description>
        <rdf:type rdf:resource="http://www.w3.org/2002/07/owl#AllDisjointClasses"/>
        <owl:members rdf:parseType="Collection">
            <rdf:Description rdf:about="http://purl.obolibrary.org/obo/hp.owl#Mild_right_lower_limb_dysmetria"/>
            <rdf:Description rdf:about="http://purl.obolibrary.org/obo/hp.owl#Moderate_right_lower_limb_dysmetria"/>
            <rdf:Description rdf:about="http://purl.obolibrary.org/obo/hp.owl#Severe_right_lower_limb_dysmetria"/>
        </owl:members>
    </rdf:Description>
    <rdf:Description>
        <rdf:type rdf:resource="http://www.w3.org/2002/07/owl#AllDisjointClasses"/>
        <owl:members rdf:parseType="Collection">
            <rdf:Description rdf:about="http://purl.obolibrary.org/obo/hp.owl#Mild_right_upper_limb_dysmetria"/>
            <rdf:Description rdf:about="http://purl.obolibrary.org/obo/hp.owl#Moderate_right_upper_limb_dysmetria"/>
            <rdf:Description rdf:about="http://purl.obolibrary.org/obo/hp.owl#Severe_right_upper_limb_dysmetria"/>
        </owl:members>
    </rdf:Description>
</rdf:RDF>


<!-- Generated by the OWL API (version 4.2.6.20160910-2108) https://github.com/owlcs/owlapi -->
