# Supplementary material for: An ontology-aware integration of clinical models, terminologies and guidelines: an exploratory study of the Scale for the Assessment and Rating of Ataxia (SARA)
Source: BMC Med Inform Decis Mak. 2017 Dec 6;17:159. doi: 10.1186/s12911-017-0568-4 (PMC5718136; doi:10.1186/s12911-017-0568-4)
Supplement: Supplementary file 3 — Contains the openEHR observation archetype related to the SARA scale. (ADL 29 kb) [file 12911_2017_568_MOESM3_ESM.adl]

archetype (adl_version=1.4)
	openEHR-EHR-OBSERVATION.sara.v0

concept
	[at0000]	-- SARA Observation Archetype
language
	original_language = <[ISO_639-1::en]>
description
	original_author = <
		["name"] = <"Maria Taboada">
		["email"] = <"maria.taboada@usc.es">
		["organisation"] = <"USC">
		["date"] = <"2017-03-01">
	>
	details = <
		["en"] = <
			language = <[ISO_639-1::en]>
			purpose = <"http://www.ataxia-study-group.net/html/about/ataxiascales/sara

SARA is a clinical scale that is based on a semiquantitative assessment of cerebellar ataxia on an impairment level. SARA has 8 items that are related to gait, stance, sitting, speech, finger-chase test, nose-finger test, fast alternating movements and heel-shin test. Although the cerebellum is directly involved in the coordination of eye movements, oculomotor functions are not considered, as the validation trials indicated that they are determined by other factors than appendicular and midline ataxia. SARA underwent a rigorous validation procedure involving three large multi-center trials in SCA and non-SCA ataxia patients, as well as controls.
">
			use = <"
Assessment of cerebellar ataxia on an impairment level for patients with Ataxia.
Depending on the disease stage, its administration takes 5–40 min (mean 14.2 min) and does not require special
training or technical equipment (Schmitz-H€ubsch et al. 2006). The eight measuring items were selected from a
standard neurological examination for their specificity for ataxia and their qualities of standardizing testing and rating procedures. A maximum score of 40 reflects most severe ataxia. The items are the following: gait (score 0 to 8), stance (score 0 to 6), sitting (score 0 to 4), speech disturbance (score 0 to 6), finger chase (score 0 to 4), nose-finger test (score 0 to 4), fast alternating hand movements (score 0 to 4), and heelshin slide (score 0 to 4). Testing of limb function is rated independently for both sides. The arithmetic mean of both sides is considered for sum scores.
">
			keywords = <"SARA", "Ataxia", "Assessment", "Scale">
			misuse = <"">
			copyright = <"">
		>
	>
	lifecycle_state = <"0">
	other_contributors = <"Haitham Maarouf", "Susi Sobrido", "Rocío Martínez", "Diego Martínez">
	other_details = <
		["references"] = <"Schmitz-HÃ¼bsch T, Tezenas du Montcel S, Baliko L, Berciano J, Boesch S et al. Scale for the assessment and rating of ataxia: development of a new clinical scale. Neurology 2006;66:1717-1720.

Schmitz-HÃ¼bsch T, Fimmers R, Rakowicz M, Rola R, Zdzienicka E, Fancellu
R et al. Responsiveness of different rating instruments in
spinocerebellar ataxia patients. Neurology 2010;74:678-84

Weyer A, Abele M, Schmitz-HÃ¼bsch T, Schoch B, Frings M et al. Reliability and validity of the Scale for the Assessment and Rating of Ataxia: A Study in 64 ataxia patients. Mov Disord 2007;22:1633-1637.

http://library.med.utah.edu/neurologicexam/html/coordination_abnormal.html#01

Funding for open access charge: National Institute of Health Carlos III (grant no. FIS2012-PI12/00373) and FEDER (european funding). ">
		["MD5-CAM-1.0.1"] = <"A450F13335F01217FB10653A144F62F2">
		["custodian_organisation"] = <"USC">
		["current_contact"] = <"Maria Taboada, maria.taboada@usc.es">
	>

definition
	OBSERVATION[at0000] matches {	-- SARA Observation Archetype
		data matches {
			HISTORY[at0001] matches {	-- Event Series
				events cardinality matches {1..*; unordered} matches {
					EVENT[at0002] occurrences matches {0..1} matches {	-- Any event
						data matches {
							ITEM_TREE[at0003] matches {	-- Tree
								items cardinality matches {0..*; unordered} matches {
									CLUSTER[at0004] occurrences matches {0..1} matches {	-- Gait and Balance
										items cardinality matches {1..*; unordered} matches {
											ELEMENT[at0005] occurrences matches {0..1} matches {	-- Gait
												value matches {
													0|[local::at0008], 	-- Normal, no difficulties in walking, turning and walking tandem (up to one misstep allowed)
													1|[local::at0009], 	-- Slight difficulties, only visible when walking 10 consecutive steps in tandem
													2|[local::at0010], 	-- Clearly abnormal, tandem walking >10 steps not possible
													3|[local::at0011], 	-- Considerable staggering, difficulties in half-turn, but without support
													4|[local::at0012], 	-- Marked staggering, intermittent support of the wall required
													5|[local::at0013], 	-- Severe staggering, permanent support of one stick or light support by one arm required
													6|[local::at0014], 	-- Walking > 10 m only with strong support (two special sticks or stroller or accompanying person)
													7|[local::at0015], 	-- Walking < 10 m only with strong support (two special sticks or stroller or accompanying person)
													8|[local::at0029]  	-- Unable to walk, even supported
												}
											}
											ELEMENT[at0006] occurrences matches {0..1} matches {	-- Stance
												value matches {
													0|[local::at0016], 	-- Normal, able to stand in tandem for > 10 s
													1|[local::at0017], 	-- Able to stand with feet together without sway, but not in tandem for > 10s
													2|[local::at0018], 	-- Able to stand with feet together for > 10 s, but only with sway
													3|[local::at0019], 	-- Able to stand for > 10 s without support in natural position, but not with feet together
													4|[local::at0020], 	-- Able to stand for >10 s in natural position only with intermittent support
													5|[local::at0026], 	-- Able to stand >10 s in natural position only with constant support of one arm
													6|[local::at0027]  	-- Unable to stand for >10 s even with constant support of one arm
												}
											}
											ELEMENT[at0007] occurrences matches {0..1} matches {	-- Sitting
												value matches {
													0|[local::at0021], 	-- Normal, no difficulties sitting >10 sec
													1|[local::at0022], 	-- Slight difficulties, intermittent sway
													2|[local::at0023], 	-- Constant sway, but able to sit > 10 s without support
													3|[local::at0024], 	-- Able to sit for > 10 s only with intermittent support
													4|[local::at0025]  	-- Unable to sit for >10 s without continuous support
												}
											}
										}
									}
									CLUSTER[at0031] occurrences matches {0..1} matches {	-- Speech Disturbance
										items cardinality matches {1..*; unordered} matches {
											ELEMENT[at0032] occurrences matches {0..1} matches {	-- Speech Disturbance
												value matches {
													0|[local::at0033], 	-- Normal
													1|[local::at0034], 	-- Suggestion of speech disturbance
													2|[local::at0035], 	-- Impaired speech, but easy to understand
													3|[local::at0036], 	-- Occasional words difficult to understand
													4|[local::at0037], 	-- Many words difficult to understand
													5|[local::at0038], 	-- Only single words understandable
													6|[local::at0039]  	-- Speech unintelligible / anarthria
												}
											}
										}
									}
									CLUSTER[at0040] occurrences matches {0..1} matches {	-- Upper and Lower Limb Coordination
										items cardinality matches {1..*; unordered} matches {
											CLUSTER[at0041] occurrences matches {0..1} matches {	-- Finger chase
												items cardinality matches {1..*; unordered} matches {
													ELEMENT[at0045] occurrences matches {0..1} matches {	-- Finger chase-right hand
														value matches {
															0|[local::at0048], 	-- No dysmetria
															1|[local::at0049], 	-- Dysmetria, under/ overshooting target <5 cm
															2|[local::at0050], 	-- Dysmetria, under/ overshooting target < 15 cm
															3|[local::at0051], 	-- Dysmetria, under/ overshooting target > 15 cm
															4|[local::at0052]  	-- Unable to perform 5 pointing movements
														}
													}
													ELEMENT[at0046] occurrences matches {0..1} matches {	-- Finger chase-left hand
														value matches {
															0|[local::at0048], 	-- No dysmetria
															1|[local::at0049], 	-- Dysmetria, under/ overshooting target <5 cm
															2|[local::at0050], 	-- Dysmetria, under/ overshooting target < 15 cm
															3|[local::at0051], 	-- Dysmetria, under/ overshooting target > 15 cm
															4|[local::at0052]  	-- Unable to perform 5 pointing movements
														}
													}
													ELEMENT[at0047] occurrences matches {0..1} matches {	-- Finger chase-mean of both sides
														value matches {
															C_DV_QUANTITY <
																property = <[openehr::380]>
																list = <
																	["1"] = <
																		units = <"1">
																		magnitude = <|0.0..4.0|>
																		precision = <|1|>
																	>
																>
															>
														}
													}
												}
											}
											CLUSTER[at0042] occurrences matches {0..1} matches {	-- Nose-finger test
												items cardinality matches {1..*; unordered} matches {
													ELEMENT[at0053] occurrences matches {0..1} matches {	-- Nose-finger test-right hand
														value matches {
															0|[local::at0056], 	-- No tremor
															1|[local::at0057], 	-- Tremor with an amplitude < 2 cm
															2|[local::at0058], 	-- Tremor with an amplitude < 5 cm
															3|[local::at0059], 	-- Tremor with an amplitude > 5 cm
															4|[local::at0060]  	-- Unable to perform 5 pointing movements
														}
													}
													ELEMENT[at0054] occurrences matches {0..1} matches {	-- Nose-finger test-left hand
														value matches {
															0|[local::at0056], 	-- No tremor
															1|[local::at0057], 	-- Tremor with an amplitude < 2 cm
															2|[local::at0058], 	-- Tremor with an amplitude < 5 cm
															3|[local::at0059], 	-- Tremor with an amplitude > 5 cm
															4|[local::at0060]  	-- Unable to perform 5 pointing movements
														}
													}
													ELEMENT[at0055] occurrences matches {0..1} matches {	-- Nose-finger test-mean of both sides
														value matches {
															C_DV_QUANTITY <
																property = <[openehr::380]>
																list = <
																	["1"] = <
																		units = <"1">
																		magnitude = <|0.0..4.0|>
																		precision = <|1|>
																	>
																>
															>
														}
													}
												}
											}
											CLUSTER[at0043] occurrences matches {0..1} matches {	-- Fast alternating hand movements 
												items cardinality matches {1..*; unordered} matches {
													ELEMENT[at0066] occurrences matches {0..1} matches {	-- Fast alternating hand movements-right hand
														value matches {
															0|[local::at0069], 	-- Normal, no irregularities (performs <10s)
															1|[local::at0070], 	-- Slightly irregular (performs <10s)
															2|[local::at0071], 	-- Clearly irregular, single movements difficult to distinguish or relevant interruptions, but performs <10s
															3|[local::at0072], 	-- Very irregular, single movements difficult to distinguish or relevant interruptions, performs >10s
															4|[local::at0073]  	-- Unable to complete 10 cycles
														}
													}
													ELEMENT[at0067] occurrences matches {0..1} matches {	-- Fast alternating hand movements-left hand
														value matches {
															0|[local::at0069], 	-- Normal, no irregularities (performs <10s)
															1|[local::at0070], 	-- Slightly irregular (performs <10s)
															2|[local::at0071], 	-- Clearly irregular, single movements difficult to distinguish or relevant interruptions, but performs <10s
															3|[local::at0072], 	-- Very irregular, single movements difficult to distinguish or relevant interruptions, performs >10s
															4|[local::at0073]  	-- Unable to complete 10 cycles
														}
													}
													ELEMENT[at0068] occurrences matches {0..1} matches {	-- Fast alternating hand movements-mean of both sides
														value matches {
															C_DV_QUANTITY <
																property = <[openehr::380]>
																list = <
																	["1"] = <
																		units = <"1">
																		magnitude = <|0.0..4.0|>
																		precision = <|1|>
																	>
																>
															>
														}
													}
												}
											}
											CLUSTER[at0044] occurrences matches {0..1} matches {	-- Heel-shin slide
												items cardinality matches {1..*; unordered} matches {
													ELEMENT[at0074] occurrences matches {0..1} matches {	-- Heel-shin slide-right hand
														value matches {
															0|[local::at0077], 	-- Normal
															1|[local::at0078], 	-- Slightly abnormal, contact to shin maintained
															2|[local::at0079], 	-- Clearly abnormal, goes off shin up to 3 times during 3 cycles
															3|[local::at0080], 	-- Severely abnormal, goes off shin 4 or more times during 3 cycles
															4|[local::at0081]  	-- Unable to perform the task
														}
													}
													ELEMENT[at0075] occurrences matches {0..1} matches {	-- Heel-shin slide-left hand
														value matches {
															0|[local::at0077], 	-- Normal
															1|[local::at0078], 	-- Slightly abnormal, contact to shin maintained
															2|[local::at0079], 	-- Clearly abnormal, goes off shin up to 3 times during 3 cycles
															3|[local::at0080], 	-- Severely abnormal, goes off shin 4 or more times during 3 cycles
															4|[local::at0081]  	-- Unable to perform the task
														}
													}
													ELEMENT[at0076] occurrences matches {0..1} matches {	-- Heel-shin slide-mean of both sides
														value matches {
															C_DV_QUANTITY <
																property = <[openehr::380]>
																list = <
																	["1"] = <
																		units = <"1">
																		magnitude = <|0.0..4.0|>
																		precision = <|1|>
																	>
																>
															>
														}
													}
												}
											}
										}
									}
									ELEMENT[at0028] occurrences matches {0..1} matches {	-- Sara Total Score
										value matches {
											C_DV_QUANTITY <
												property = <[openehr::380]>
												list = <
													["1"] = <
														units = <"1">
														magnitude = <|0.0..40.0|>
														precision = <|1|>
													>
												>
											>
										}
									}
									ELEMENT[at0088] occurrences matches {0..1} matches {	-- Date
										value matches {
											DV_DATE matches {
												value matches {yyyy-mm-dd}
											}
										}
									}
								}
							}
						}
					}
				}
			}
		}
	}

ontology
	terminologies_available = <"HPO2015_04_20", ...>
	term_definitions = <
		["en"] = <
			items = <
				["at0000"] = <
					text = <"SARA Observation Archetype">
					description = <"Scale for the assessment and rating of ataxia (SARA)">
				>
				["at0001"] = <
					text = <"Event Series">
					description = <"@ internal @">
				>
				["at0002"] = <
					text = <"Any event">
					description = <"*">
				>
				["at0003"] = <
					text = <"Tree">
					description = <"@ internal @">
				>
				["at0004"] = <
					text = <"Gait and Balance">
					description = <"*">
				>
				["at0005"] = <
					text = <"Gait">
					description = <"Proband is asked (1) to walk at a safe distance parallel to
a wall including a half-turn (turn around to face the
opposite direction of gait) and (2) to walk in tandem
(heels to toes) without support.">
					comment = <"http://library.med.utah.edu/neurologicexam/html/coordination_abnormal.html#11
Natural Gait
Wide-based, unsteady, irregular steps with lateral veering; ataxia is most prominent when sudden changes are needed such as turning, standing up or stopping.
http://library.med.utah.edu/neurologicexam/html/coordination_abnormal.html#12
Tandem Gait
Patients with ataxia have difficulty narrowing the station in order to walk heel to toe. Tandem gait is helpful in identifying subtle or mild gait ataxia. ">
				>
				["at0006"] = <
					text = <"Stance">
					description = <"Proband is asked to stand (1) in natural position, (2) with
feet together in parallel (big toes touching each other) and
(3) in tandem (both feet on one line, no space between
heel and toe). Proband does not wear shoes, eyes are
open. For each condition, three trials are allowed. Best
 trial is rated.">
					comment = <"http://library.med.utah.edu/neurologicexam/html/coordination_abnormal.html#10
Station
Patient's feet will be placed wider apart then usual in order to maintain balance (broad or wide-based station). Midline ataxias cause instability of station with eyes opened or closed.">
				>
				["at0007"] = <
					text = <"Sitting">
					description = <"Proband is asked to sit on an examination bed without
support of feet, eyes open and arms outstretched to the
front.">
				>
				["at0008"] = <
					text = <"Normal, no difficulties in walking, turning and walking tandem (up to one misstep allowed)">
					description = <"*">
				>
				["at0009"] = <
					text = <"Slight difficulties, only visible when walking 10 consecutive steps in tandem">
					description = <"*">
				>
				["at0010"] = <
					text = <"Clearly abnormal, tandem walking >10 steps not possible">
					description = <"*">
				>
				["at0011"] = <
					text = <"Considerable staggering, difficulties in half-turn, but without support">
					description = <"*">
				>
				["at0012"] = <
					text = <"Marked staggering, intermittent support of the wall required">
					description = <"*">
				>
				["at0013"] = <
					text = <"Severe staggering, permanent support of one stick or light support by one arm required">
					description = <"*">
				>
				["at0014"] = <
					text = <"Walking > 10 m only with strong support (two special sticks or stroller or accompanying person)">
					description = <"*">
				>
				["at0015"] = <
					text = <"Walking < 10 m only with strong support (two special sticks or stroller or accompanying person)">
					description = <"*">
				>
				["at0016"] = <
					text = <"Normal, able to stand in tandem for > 10 s">
					description = <"*">
				>
				["at0017"] = <
					text = <"Able to stand with feet together without sway, but not in tandem for > 10s">
					description = <"*">
				>
				["at0018"] = <
					text = <"Able to stand with feet together for > 10 s, but only with sway">
					description = <"*">
				>
				["at0019"] = <
					text = <"Able to stand for > 10 s without support in natural position, but not with feet together">
					description = <"*">
				>
				["at0020"] = <
					text = <"Able to stand for >10 s in natural position only with intermittent support">
					description = <"*">
				>
				["at0021"] = <
					text = <"Normal, no difficulties sitting >10 sec">
					description = <"*">
				>
				["at0022"] = <
					text = <"Slight difficulties, intermittent sway">
					description = <"*">
				>
				["at0023"] = <
					text = <"Constant sway, but able to sit > 10 s without support">
					description = <"*">
				>
				["at0024"] = <
					text = <"Able to sit for > 10 s only with intermittent support">
					description = <"*">
				>
				["at0025"] = <
					text = <"Unable to sit for >10 s without continuous support">
					description = <"*">
				>
				["at0026"] = <
					text = <"Able to stand >10 s in natural position only with constant support of one arm">
					description = <"*">
				>
				["at0027"] = <
					text = <"Unable to stand for >10 s even with constant support of one arm">
					description = <"*">
				>
				["at0028"] = <
					text = <"Sara Total Score">
					description = <"*">
					comment = <"(((((((Gait + Stance) + Sitting) + Speech Disturbance) + Finger chase-mean of both sides) + Nose-finger test-mean of both sides) + Fast alternating hand movements-mean of both sides) + Heel-shin slide-mean of both sides) ">
				>
				["at0029"] = <
					text = <"Unable to walk, even supported">
					description = <"*">
				>
				["at0031"] = <
					text = <"Speech Disturbance">
					description = <"*">
				>
				["at0032"] = <
					text = <"Speech Disturbance">
					description = <"Speech is assessed during normal conversation.">
				>
				["at0033"] = <
					text = <"Normal">
					description = <"*">
				>
				["at0034"] = <
					text = <"Suggestion of speech disturbance">
					description = <"*">
				>
				["at0035"] = <
					text = <"Impaired speech, but easy to understand">
					description = <"*">
				>
				["at0036"] = <
					text = <"Occasional words difficult to understand">
					description = <"*">
				>
				["at0037"] = <
					text = <"Many words difficult to understand">
					description = <"*">
				>
				["at0038"] = <
					text = <"Only single words understandable">
					description = <"*">
				>
				["at0039"] = <
					text = <"Speech unintelligible / anarthria">
					description = <"*">
				>
				["at0040"] = <
					text = <"Upper and Lower Limb Coordination">
					description = <"*">
				>
				["at0041"] = <
					text = <"Finger chase">
					description = <"Proband sits comfortably. If necessary, support of feet
and trunk is allowed. Examiner sits in front of proband
and performs 5 consecutive sudden and fast pointing
movements in unpredictable directions in a frontal plane,
at about 50 % of proband´s reach. Movements have an
amplitude of 30 cm and a frequency of 1 movement
every 2 s. Proband is asked to follow the movements
with his index finger, as fast and precisely as possible.
Average performance of last 3 movements is rated.">
				>
				["at0042"] = <
					text = <"Nose-finger test">
					description = <"Proband sits comfortably. If necessary, support of feet
and trunk is allowed. Proband is asked to point repeatedly
with his index finger from his nose to examiner’s finger
which is in front of the proband at about 90 % of
proband’s reach. Movements are performed at moderate
speed. Average performance of movements is rated
according to the amplitude of the kinetic tremor.">
				>
				["at0043"] = <
					text = <"Fast alternating hand movements ">
					description = <"Proband sits comfortably. If necessary, support of feet
and trunk is allowed. Proband is asked to perform 10
cycles of repetitive alternation of pro- and supinations of
the hand on his/her thigh as fast and as precise as
possible. Movement is demonstrated by examiner at a
speed of approx. 10 cycles within 7 s. Exact times for
movement execution have to be taken.">
				>
				["at0044"] = <
					text = <"Heel-shin slide">
					description = <"Proband lies on examination bed, without sight of his
legs. Proband is asked to lift one leg, point with the heel
to the opposite knee, slide down along the shin to the
ankle, and lay the leg back on the examination bed. The
task is performed 3 times. Slide-down movements should
be performed within 1 s. If proband slides down without
contact to shin in all three trials, rate 4.">
				>
				["at0045"] = <
					text = <"Finger chase-right hand">
					description = <"*">
				>
				["at0046"] = <
					text = <"Finger chase-left hand">
					description = <"*">
				>
				["at0047"] = <
					text = <"Finger chase-mean of both sides">
					description = <"*">
					comment = <"((Finger chase-right hand + Finger chase-left hand) / 2) 
">
				>
				["at0048"] = <
					text = <"No dysmetria">
					description = <"*">
				>
				["at0049"] = <
					text = <"Dysmetria, under/ overshooting target <5 cm">
					description = <"*">
				>
				["at0050"] = <
					text = <"Dysmetria, under/ overshooting target < 15 cm">
					description = <"*">
				>
				["at0051"] = <
					text = <"Dysmetria, under/ overshooting target > 15 cm">
					description = <"*">
				>
				["at0052"] = <
					text = <"Unable to perform 5 pointing movements">
					description = <"*">
				>
				["at0053"] = <
					text = <"Nose-finger test-right hand">
					description = <"*">
				>
				["at0054"] = <
					text = <"Nose-finger test-left hand">
					description = <"*">
				>
				["at0055"] = <
					text = <"Nose-finger test-mean of both sides">
					description = <"*">
					comment = <"((Nose-finger test-right hand + Nose-finger test-left hand) / 2) ">
				>
				["at0056"] = <
					text = <"No tremor">
					description = <"*">
				>
				["at0057"] = <
					text = <"Tremor with an amplitude < 2 cm">
					description = <"*">
				>
				["at0058"] = <
					text = <"Tremor with an amplitude < 5 cm">
					description = <"*">
				>
				["at0059"] = <
					text = <"Tremor with an amplitude > 5 cm">
					description = <"*">
				>
				["at0060"] = <
					text = <"Unable to perform 5 pointing movements">
					description = <"*">
				>
				["at0066"] = <
					text = <"Fast alternating hand movements-right hand">
					description = <"*">
				>
				["at0067"] = <
					text = <"Fast alternating hand movements-left hand">
					description = <"*">
				>
				["at0068"] = <
					text = <"Fast alternating hand movements-mean of both sides">
					description = <"*">
					comment = <"((Fast alternating hand movements-right hand + Fast alternating hand movements-left hand) / 2) 
">
				>
				["at0069"] = <
					text = <"Normal, no irregularities (performs <10s)">
					description = <"*">
				>
				["at0070"] = <
					text = <"Slightly irregular (performs <10s)">
					description = <"*">
				>
				["at0071"] = <
					text = <"Clearly irregular, single movements difficult to distinguish or relevant interruptions, but performs <10s">
					description = <"*">
				>
				["at0072"] = <
					text = <"Very irregular, single movements difficult to distinguish or relevant interruptions, performs >10s">
					description = <"*">
				>
				["at0073"] = <
					text = <"Unable to complete 10 cycles">
					description = <"*">
				>
				["at0074"] = <
					text = <"Heel-shin slide-right hand">
					description = <"*">
				>
				["at0075"] = <
					text = <"Heel-shin slide-left hand">
					description = <"*">
				>
				["at0076"] = <
					text = <"Heel-shin slide-mean of both sides">
					description = <"*">
					comment = <"((Heel-shin slide-right hand + Heel-shin slide-left hand) / 2) ">
				>
				["at0077"] = <
					text = <"Normal">
					description = <"*">
				>
				["at0078"] = <
					text = <"Slightly abnormal, contact to shin maintained">
					description = <"*">
				>
				["at0079"] = <
					text = <"Clearly abnormal, goes off shin up to 3 times during 3 cycles">
					description = <"*">
				>
				["at0080"] = <
					text = <"Severely abnormal, goes off shin 4 or more times during 3 cycles">
					description = <"*">
				>
				["at0081"] = <
					text = <"Unable to perform the task">
					description = <"*">
				>
				["at0088"] = <
					text = <"Date">
					description = <"*">
				>
			>
		>
	>
	term_bindings = <
		["HPO2015_04_20"] = <
			items = <
				["at0005"] = <[HPO2015_04_20::HP0002066]>
				["at0006"] = <[HPO2015_04_20::new02]>
				["at0007"] = <[HPO2015_04_20::new03]>
				["at0008"] = <[HPO2015_04_20::NA]>
				["at0009"] = <[HPO2015_04_20::HP0012827]>
				["at0010"] = <[HPO2015_04_20::HP0012825]>
				["at0011"] = <[HPO2015_04_20::HP0012826]>
				["at0012"] = <[HPO2015_04_20::HP0012826]>
				["at0013"] = <[HPO2015_04_20::HP0012828]>
				["at0014"] = <[HPO2015_04_20::HP0012828]>
				["at0015"] = <[HPO2015_04_20::HP0012828]>
				["at0016"] = <[HPO2015_04_20::NA]>
				["at0017"] = <[HPO2015_04_20::HP0012827]>
				["at0018"] = <[HPO2015_04_20::HP0012825]>
				["at0019"] = <[HPO2015_04_20::HP0012825]>
				["at0020"] = <[HPO2015_04_20::HP0012826]>
				["at0021"] = <[HPO2015_04_20::NA]>
				["at0022"] = <[HPO2015_04_20::HP0012827]>
				["at0023"] = <[HPO2015_04_20::HP0012825]>
				["at0024"] = <[HPO2015_04_20::HP0012826]>
				["at0025"] = <[HPO2015_04_20::HP0012828]>
				["at0026"] = <[HPO2015_04_20::HP0012828]>
				["at0027"] = <[HPO2015_04_20::HP0012829]>
				["at0029"] = <[HPO2015_04_20::HP0012829]>
				["at0032"] = <[HPO2015_04_20::HP0001260]>
				["at0033"] = <[HPO2015_04_20::NA]>
				["at0034"] = <[HPO2015_04_20::HP0012827]>
				["at0035"] = <[HPO2015_04_20::HP0012825]>
				["at0036"] = <[HPO2015_04_20::HP0012826]>
				["at0037"] = <[HPO2015_04_20::HP0012826]>
				["at0038"] = <[HPO2015_04_20::HP0012828]>
				["at0039"] = <[HPO2015_04_20::HP0012829]>
				["at0045"] = <[HPO2015_04_20::new05]>
				["at0046"] = <[HPO2015_04_20::new05]>
				["at0048"] = <[HPO2015_04_20::NA]>
				["at0049"] = <[HPO2015_04_20::HP0012825]>
				["at0050"] = <[HPO2015_04_20::HP0012826]>
				["at0051"] = <[HPO2015_04_20::HP0012828]>
				["at0052"] = <[HPO2015_04_20::HP0012828]>
				["at0053"] = <[HPO2015_04_20::HP0002080]>
				["at0054"] = <[HPO2015_04_20::HP0002080]>
				["at0056"] = <[HPO2015_04_20::NA]>
				["at0057"] = <[HPO2015_04_20::HP0012825]>
				["at0058"] = <[HPO2015_04_20::HP0012826]>
				["at0059"] = <[HPO2015_04_20::HP0012828]>
				["at0060"] = <[HPO2015_04_20::HP0012828]>
				["at0066"] = <[HPO2015_04_20::HP0002075]>
				["at0067"] = <[HPO2015_04_20::HP0002075]>
				["at0069"] = <[HPO2015_04_20::NA]>
				["at0070"] = <[HPO2015_04_20::HP0012825]>
				["at0071"] = <[HPO2015_04_20::HP0012826]>
				["at0072"] = <[HPO2015_04_20::HP0012828]>
				["at0073"] = <[HPO2015_04_20::HP0012828]>
				["at0074"] = <[HPO2015_04_20::new08]>
				["at0075"] = <[HPO2015_04_20::new08]>
				["at0077"] = <[HPO2015_04_20::NA]>
				["at0078"] = <[HPO2015_04_20::HP0012825]>
				["at0079"] = <[HPO2015_04_20::HP0012826]>
				["at0080"] = <[HPO2015_04_20::HP0012828]>
				["at0081"] = <[HPO2015_04_20::HP0012828]>
			>
		>
	>
