# Supplementary material for: An ontology-aware integration of clinical models, terminologies and guidelines: an exploratory study of the Scale for the Assessment and Rating of Ataxia (SARA)
Source: BMC Med Inform Decis Mak. 2017 Dec 6;17:159. doi: 10.1186/s12911-017-0568-4 (PMC5718136; doi:10.1186/s12911-017-0568-4)
Supplement: Supplementary file 4 — Contains the openEHR evaluation archetype related to the SARA scale. (ADL 27 kb) [file 12911_2017_568_MOESM4_ESM.adl]

archetype (adl_version=1.4)
	openEHR-EHR-EVALUATION.sara.v0

concept
	[at0000]	-- SARA Scale
language
	original_language = <[ISO_639-1::en]>
description
	original_author = <
		["name"] = <"Maria Taboada">
		["email"] = <"maria.taboada@usc.es">
		["organisation"] = <"http://www.usc.es/keam/">
		["date"] = <"2016-12-26">
	>
	details = <
		["en"] = <
			language = <[ISO_639-1::en]>
			purpose = <"
SARA is a clinical scale that is based on a semiquantitative assessment of cerebellar ataxia on an impairment level. SARA has 8 items that are related to gait, stance, sitting, speech, finger-chase test, nose-finger test, fast alternating movements and heel-shin test. Although the cerebellum is directly involved in the coordination of eye movements, oculomotor functions are not considered, as the validation trials indicated that they are determined by other factors than appendicular and midline ataxia. SARA underwent a rigorous validation procedure involving three large multi-center trials in SCA and non-SCA ataxia patients, as well as controls.">
			use = <" 
The SARA Evaluation archetype is intended to record the clinical interpretations from the patient observations (collected following the SARA Observation archetype). We distinguished three types of interpretations: 
•Interpretations  directly inferred from individual items or total score (i.e., from the corresponding element in the observation archetype). For example, the presence of gait ataxia and the severity degree from the values for the first item. 
•Interpretations  directly inferred from specific values for an individual item. For example, the presence of abasia from the value 8 (unable to walk, even supported) for the item gait.
•Interpretations  elucidating the patient abnormalities associated with the clinical dimensions of the scale. For example, the presence of any phenotypic abnormality defined into the ontology. ">
			keywords = <"SARA", "HPO", "ATAXIA", "Cerebellar Syndrome.  ">
			misuse = <"">
			copyright = <"">
		>
	>
	lifecycle_state = <"0">
	other_contributors = <"Haitham Maarouf", "María-Jesús Sobrido">
	other_details = <
		["licence"] = <"Funding for open access charge: National Institute of Health Carlos III (grant no. FIS2012-PI12/00373) and FEDER (european funding). ">
		["references"] = <"
Aguiar, P., J. Pardo, M. Arias, B. Quintáns, M. Fernández‐Prieto, R. Martínez‐Regueiro, J.M. Pumar, J. Silva‐Rodríguez, Á. Ruibal, and M.J. Sobrido, PET and MRI detection of early and progressive neurodegeneration in spinocerebellar ataxia type 36. Movement Disorders, 2016.
http://onlinelibrary.wiley.com/doi/10.1002/mds.26854/full

Ataxia Study Group: Scale for the Assessment and Rating of Ataxia (SARA) cited 18-Aug-2016 http://www.ataxia-study-group.net/html/about/ataxiascales/sara?asgsid=varcyain.

Schmitz-HÃ¼bsch T, Tezenas du Montcel S, Baliko L, Berciano J, Boesch S et al. Scale for the assessment and rating of ataxia: development of a new clinical scale. Neurology 2006;66:1717-1720.

Schmitz-HÃ¼bsch T, Fimmers R, Rakowicz M, Rola R, Zdzienicka E, Fancellu
R et al. Responsiveness of different rating instruments in
spinocerebellar ataxia patients. Neurology 2010;74:678-84

Weyer A, Abele M, Schmitz-HÃ¼bsch T, Schoch B, Frings M et al. Reliability and validity of the Scale for the Assessment and Rating of Ataxia: A Study in 64 ataxia patients. Mov Disord 2007;22:1633-1637.

http://library.med.utah.edu/neurologicexam/html/coordination_abnormal.html#01

This work was supported by the National Institute of Health Carlos III [grant no. FIS2012-PI12/00373: OntoNeurophen], FEDER for national and European funding.">
		["current_contact"] = <"Maria Taboada, maria.taboada@usc.es">
		["MD5-CAM-1.0.1"] = <"692E4DCD666DC5042CCFAC923672520C">
		["custodian_organisation"] = <"http://www.usc.es/keam/">
	>

definition
	EVALUATION[at0000] matches {	-- SARA Scale
		data matches {
			ITEM_TREE[at0001] matches {	-- Tree
				items cardinality matches {0..*; unordered} matches {
					CLUSTER[at0114] occurrences matches {0..1} matches {	-- Gait and Balance
						items cardinality matches {1..*; unordered} matches {
							CLUSTER[at0118] occurrences matches {0..1} matches {	-- Gait Ataxia
								items cardinality matches {1..*; unordered} matches {
									ELEMENT[at0002] occurrences matches {0..1} matches {	-- Gait Ataxia
										value matches {
											DV_CODED_TEXT matches {
												defining_code matches {
													[local::
													at0003, 	-- Normal
													at0042, 	-- Borderline
													at0004, 	-- Mild
													at0005, 	-- Moderate
													at0006, 	-- Severe
													at0043]	-- profound
												}
											}
											DV_TEXT matches {*}
										}
									}
									ELEMENT[at0104] occurrences matches {0..1} matches {	-- Abasia
										value matches {
											DV_CODED_TEXT matches {
												defining_code matches {
													[local::
													at0105, 	-- No
													at0106]	-- Yes
												}
											}
											DV_TEXT matches {*}
										}
									}
								}
							}
							CLUSTER[at0119] occurrences matches {0..1} matches {	-- Standing Instability
								items cardinality matches {1..*; unordered} matches {
									ELEMENT[at0007] occurrences matches {0..1} matches {	-- Standing Instability
										value matches {
											DV_CODED_TEXT matches {
												defining_code matches {
													[local::
													at0008, 	-- Normal
													at0044, 	-- Borderline
													at0009, 	-- Mild
													at0010, 	-- Moderate
													at0011, 	-- Severe
													at0045]	-- profound
												}
											}
											DV_TEXT matches {*}
										}
									}
									ELEMENT[at0108] occurrences matches {0..1} matches {	-- Astasia
										value matches {
											DV_CODED_TEXT matches {
												defining_code matches {
													[local::
													at0109, 	-- No
													at0110]	-- Yes
												}
											}
											DV_TEXT matches {*}
										}
									}
								}
							}
							ELEMENT[at0012] occurrences matches {0..1} matches {	-- Sitting Instability
								value matches {
									DV_CODED_TEXT matches {
										defining_code matches {
											[local::
											at0013, 	-- Normal
											at0046, 	-- Borderline
											at0014, 	-- Mild
											at0015, 	-- Moderate
											at0016, 	-- Severe
											at0047]	-- Profound
										}
									}
									DV_TEXT matches {*}
								}
							}
							ELEMENT[at0064] occurrences matches {0..1} matches {	-- Midline Ataxia
								value matches {
									DV_CODED_TEXT matches {
										defining_code matches {
											[local::
											at0008, 	-- Normal
											at0056, 	-- Borderline
											at0009, 	-- Mild
											at0010, 	-- Moderate
											at0011, 	-- Severe
											at0057]	-- Profound
										}
									}
									DV_TEXT matches {*}
								}
							}
						}
					}
					CLUSTER[at0115] occurrences matches {0..1} matches {	-- Speech Disturbance
						items cardinality matches {1..*; unordered} matches {
							ELEMENT[at0017] occurrences matches {0..1} matches {	-- Dysarthria
								value matches {
									DV_CODED_TEXT matches {
										defining_code matches {
											[local::
											at0018, 	-- Moderate
											at0048, 	-- Borderline
											at0019, 	-- Mild
											at0020, 	-- Normal
											at0021, 	-- Severe
											at0049]	-- Profound
										}
									}
									DV_TEXT matches {*}
								}
								null_flavour existence matches {0..1} matches {
									DV_CODED_TEXT matches {
										defining_code matches {
											[openehr::
											253, 
											272, 
											273, 
											271]
										}
									}
								}
							}
							ELEMENT[at0111] occurrences matches {0..1} matches {	-- Anarthria
								value matches {
									DV_CODED_TEXT matches {
										defining_code matches {
											[local::
											at0112, 	-- No
											at0113]	-- Yes
										}
									}
									DV_TEXT matches {*}
								}
							}
						}
					}
					CLUSTER[at0120] occurrences matches {0..1} matches {	-- Upper and Lower Limb Coordination 
						items cardinality matches {1..*; unordered} matches {
							CLUSTER[at0121] occurrences matches {0..1} matches {	-- Appendicular Ataxia
								items cardinality matches {1..*; unordered} matches {
									ELEMENT[at0122] occurrences matches {0..1} matches {	-- Appendicular Ataxia
										value matches {
											DV_CODED_TEXT matches {
												defining_code matches {
													[local::
													at0123, 	-- Normal
													at0124, 	-- Mild
													at0125, 	-- Moderate
													at0126]	-- Severe
												}
											}
											DV_TEXT matches {*}
										}
									}
									CLUSTER[at0116] occurrences matches {0..1} matches {	-- Appendicular Ataxia Right Side
										items cardinality matches {1..*; unordered} matches {
											ELEMENT[at0065] occurrences matches {0..1} matches {	-- Appendicular Ataxia Right
												value matches {
													DV_CODED_TEXT matches {
														defining_code matches {
															[local::
															at0066, 	-- Normal
															at0067, 	-- Mild
															at0068, 	-- Moderate
															at0069]	-- Severe
														}
													}
													DV_TEXT matches {*}
												}
											}
											ELEMENT[at0072] occurrences matches {0..1} matches {	-- Lower Limb Dysmetria Right
												value matches {
													DV_CODED_TEXT matches {
														defining_code matches {
															[local::
															at0087, 	-- Normal
															at0088, 	-- Borderline
															at0089, 	-- Mild
															at0090, 	-- Moderate
															at0091, 	-- Severe
															at0092]	-- Profound
														}
													}
													DV_TEXT matches {*}
												}
											}
											ELEMENT[at0070] occurrences matches {0..1} matches {	-- Dysdiadochokinesis Right
												value matches {
													DV_CODED_TEXT matches {
														defining_code matches {
															[local::
															at0074, 	-- Normal
															at0075, 	-- Borderline
															at0076, 	-- Mild
															at0077, 	-- Moderate
															at0078, 	-- Severe
															at0079]	-- Profound
														}
													}
													DV_TEXT matches {*}
												}
											}
											ELEMENT[at0032] occurrences matches {0..1} matches {	-- Intention Tremor Right
												value matches {
													DV_CODED_TEXT matches {
														defining_code matches {
															[local::
															at0033, 	-- Normal
															at0054, 	-- Borderline
															at0034, 	-- Mild
															at0035, 	-- Moderate
															at0036, 	-- Severe
															at0055]	-- Profound
														}
													}
													DV_TEXT matches {*}
												}
											}
											ELEMENT[at0022] occurrences matches {0..1} matches {	-- Upper Limb Dysmetria Right
												value matches {
													DV_CODED_TEXT matches {
														defining_code matches {
															[local::
															at0023, 	-- Normal
															at0050, 	-- Borderline
															at0024, 	-- Mild
															at0025, 	-- Moderate
															at0026, 	-- Severe
															at0051]	-- Profound
														}
													}
													DV_TEXT matches {*}
												}
											}
										}
									}
									CLUSTER[at0117] occurrences matches {0..1} matches {	-- Appendicular Ataxia Left Side
										items cardinality matches {1..*; unordered} matches {
											ELEMENT[at0027] occurrences matches {0..1} matches {	-- Upper Limb Dysmetria Left
												value matches {
													DV_CODED_TEXT matches {
														defining_code matches {
															[local::
															at0028, 	-- Normal
															at0052, 	-- Borderline
															at0029, 	-- Mild
															at0030, 	-- Moderate
															at0031, 	-- Severe
															at0053]	-- Profound
														}
													}
													DV_TEXT matches {*}
												}
											}
											ELEMENT[at0037] occurrences matches {0..1} matches {	-- Intention Tremor Left
												value matches {
													DV_CODED_TEXT matches {
														defining_code matches {
															[local::
															at0038, 	-- Normal
															at0056, 	-- Borderline
															at0039, 	-- Mild
															at0040, 	-- Moderate
															at0041, 	-- Severe
															at0057]	-- Profound
														}
													}
													DV_TEXT matches {*}
												}
											}
											ELEMENT[at0099] occurrences matches {0..1} matches {	-- Appendicular Ataxia Left
												value matches {
													DV_CODED_TEXT matches {
														defining_code matches {
															[local::
															at0100, 	-- Normal
															at0101, 	-- Mild
															at0102, 	-- Moderate
															at0103]	-- Severe
														}
													}
													DV_TEXT matches {*}
												}
											}
											ELEMENT[at0071] occurrences matches {0..1} matches {	-- Dysdiadochokinesis Left
												value matches {
													DV_CODED_TEXT matches {
														defining_code matches {
															[local::
															at0081, 	-- Normal
															at0082, 	-- Borderline
															at0083, 	-- Mild
															at0084, 	-- Moderate
															at0085, 	-- Severe
															at0086]	-- Profound
														}
													}
													DV_TEXT matches {*}
												}
											}
											ELEMENT[at0073] occurrences matches {0..1} matches {	-- Lower Limb Dysmetria Left
												value matches {
													DV_CODED_TEXT matches {
														defining_code matches {
															[local::
															at0093, 	-- Normal
															at0094, 	-- Borderline
															at0095, 	-- Mild
															at0096, 	-- Moderate
															at0097, 	-- Severe
															at0098]	-- Profound
														}
													}
													DV_TEXT matches {*}
												}
											}
										}
									}
								}
							}
						}
					}
					ELEMENT[at0058] occurrences matches {0..1} matches {	-- Cerebellar  Syndrome
						value matches {
							DV_CODED_TEXT matches {
								defining_code matches {
									[local::
									at0059, 	-- No
									at0060, 	-- No Significant
									at0061, 	-- Mild
									at0062, 	-- Moderate
									at0063]	-- Severe
								}
							}
							DV_TEXT matches {*}
						}
					}
					ELEMENT[at0127] occurrences matches {0..1} matches {	-- Overall Status
						value matches {
							DV_TEXT matches {*}
						}
					}
				}
			}
		}
	}

ontology
	terminologies_available = <"HPO2015_04_20", ...>
	term_definitions = <
		["en"] = <
			items = <
				["at0000"] = <
					text = <"SARA Scale">
					description = <"The Scale for the Assessment and Rating of Ataxia (SARA)">
				>
				["at0001"] = <
					text = <"Tree">
					description = <"@ internal @">
				>
				["at0002"] = <
					text = <"Gait Ataxia">
					description = <"*">
				>
				["at0003"] = <
					text = <"Normal">
					description = <"*">
				>
				["at0004"] = <
					text = <"Mild">
					description = <"*">
				>
				["at0005"] = <
					text = <"Moderate">
					description = <"*">
				>
				["at0006"] = <
					text = <"Severe">
					description = <"*">
				>
				["at0007"] = <
					text = <"Standing Instability">
					description = <"*">
				>
				["at0008"] = <
					text = <"Normal">
					description = <"*">
				>
				["at0009"] = <
					text = <"Mild">
					description = <"*">
				>
				["at0010"] = <
					text = <"Moderate">
					description = <"*">
				>
				["at0011"] = <
					text = <"Severe">
					description = <"*">
				>
				["at0012"] = <
					text = <"Sitting Instability">
					description = <"*">
				>
				["at0013"] = <
					text = <"Normal">
					description = <"*">
				>
				["at0014"] = <
					text = <"Mild">
					description = <"*">
				>
				["at0015"] = <
					text = <"Moderate">
					description = <"*">
				>
				["at0016"] = <
					text = <"Severe">
					description = <"*">
				>
				["at0017"] = <
					text = <"Dysarthria">
					description = <"*">
				>
				["at0018"] = <
					text = <"Moderate">
					description = <"*">
				>
				["at0019"] = <
					text = <"Mild">
					description = <"*">
				>
				["at0020"] = <
					text = <"Normal">
					description = <"*">
				>
				["at0021"] = <
					text = <"Severe">
					description = <"*">
				>
				["at0022"] = <
					text = <"Upper Limb Dysmetria Right">
					description = <"*">
				>
				["at0023"] = <
					text = <"Normal">
					description = <"*">
				>
				["at0024"] = <
					text = <"Mild">
					description = <"*">
				>
				["at0025"] = <
					text = <"Moderate">
					description = <"*">
				>
				["at0026"] = <
					text = <"Severe">
					description = <"*">
				>
				["at0027"] = <
					text = <"Upper Limb Dysmetria Left">
					description = <"*">
				>
				["at0028"] = <
					text = <"Normal">
					description = <"*">
				>
				["at0029"] = <
					text = <"Mild">
					description = <"*">
				>
				["at0030"] = <
					text = <"Moderate">
					description = <"*">
				>
				["at0031"] = <
					text = <"Severe">
					description = <"*">
				>
				["at0032"] = <
					text = <"Intention Tremor Right">
					description = <"*">
				>
				["at0033"] = <
					text = <"Normal">
					description = <"*">
				>
				["at0034"] = <
					text = <"Mild">
					description = <"*">
				>
				["at0035"] = <
					text = <"Moderate">
					description = <"*">
				>
				["at0036"] = <
					text = <"Severe">
					description = <"*">
				>
				["at0037"] = <
					text = <"Intention Tremor Left">
					description = <"*">
				>
				["at0038"] = <
					text = <"Normal">
					description = <"*">
				>
				["at0039"] = <
					text = <"Mild">
					description = <"*">
				>
				["at0040"] = <
					text = <"Moderate">
					description = <"*">
				>
				["at0041"] = <
					text = <"Severe">
					description = <"*">
				>
				["at0042"] = <
					text = <"Borderline">
					description = <"*">
				>
				["at0043"] = <
					text = <"profound">
					description = <"*">
				>
				["at0044"] = <
					text = <"Borderline">
					description = <"*">
				>
				["at0045"] = <
					text = <"profound">
					description = <"*">
				>
				["at0046"] = <
					text = <"Borderline">
					description = <"*">
				>
				["at0047"] = <
					text = <"Profound">
					description = <"*">
				>
				["at0048"] = <
					text = <"Borderline">
					description = <"*">
				>
				["at0049"] = <
					text = <"Profound">
					description = <"*">
				>
				["at0050"] = <
					text = <"Borderline">
					description = <"*">
				>
				["at0051"] = <
					text = <"Profound">
					description = <"*">
				>
				["at0052"] = <
					text = <"Borderline">
					description = <"*">
				>
				["at0053"] = <
					text = <"Profound">
					description = <"*">
				>
				["at0054"] = <
					text = <"Borderline">
					description = <"*">
				>
				["at0055"] = <
					text = <"Profound">
					description = <"*">
				>
				["at0056"] = <
					text = <"Borderline">
					description = <"*">
				>
				["at0057"] = <
					text = <"Profound">
					description = <"*">
				>
				["at0058"] = <
					text = <"Cerebellar  Syndrome">
					description = <"*">
				>
				["at0059"] = <
					text = <"No">
					description = <"*">
				>
				["at0060"] = <
					text = <"No Significant">
					description = <"*">
				>
				["at0061"] = <
					text = <"Mild">
					description = <"*">
				>
				["at0062"] = <
					text = <"Moderate">
					description = <"*">
				>
				["at0063"] = <
					text = <"Severe">
					description = <"*">
				>
				["at0064"] = <
					text = <"Midline Ataxia">
					description = <"*">
				>
				["at0065"] = <
					text = <"Appendicular Ataxia Right">
					description = <"*">
				>
				["at0066"] = <
					text = <"Normal">
					description = <"*">
				>
				["at0067"] = <
					text = <"Mild">
					description = <"*">
				>
				["at0068"] = <
					text = <"Moderate">
					description = <"*">
				>
				["at0069"] = <
					text = <"Severe">
					description = <"*">
				>
				["at0070"] = <
					text = <"Dysdiadochokinesis Right">
					description = <"*">
				>
				["at0071"] = <
					text = <"Dysdiadochokinesis Left">
					description = <"*">
				>
				["at0072"] = <
					text = <"Lower Limb Dysmetria Right">
					description = <"*">
				>
				["at0073"] = <
					text = <"Lower Limb Dysmetria Left">
					description = <"*">
				>
				["at0074"] = <
					text = <"Normal">
					description = <"*">
				>
				["at0075"] = <
					text = <"Borderline">
					description = <"*">
				>
				["at0076"] = <
					text = <"Mild">
					description = <"*">
				>
				["at0077"] = <
					text = <"Moderate">
					description = <"*">
				>
				["at0078"] = <
					text = <"Severe">
					description = <"*">
				>
				["at0079"] = <
					text = <"Profound">
					description = <"*">
				>
				["at0081"] = <
					text = <"Normal">
					description = <"*">
				>
				["at0082"] = <
					text = <"Borderline">
					description = <"*">
				>
				["at0083"] = <
					text = <"Mild">
					description = <"*">
				>
				["at0084"] = <
					text = <"Moderate">
					description = <"*">
				>
				["at0085"] = <
					text = <"Severe">
					description = <"*">
				>
				["at0086"] = <
					text = <"Profound">
					description = <"*">
				>
				["at0087"] = <
					text = <"Normal">
					description = <"*">
				>
				["at0088"] = <
					text = <"Borderline">
					description = <"*">
				>
				["at0089"] = <
					text = <"Mild">
					description = <"*">
				>
				["at0090"] = <
					text = <"Moderate">
					description = <"*">
				>
				["at0091"] = <
					text = <"Severe">
					description = <"*">
				>
				["at0092"] = <
					text = <"Profound">
					description = <"*">
				>
				["at0093"] = <
					text = <"Normal">
					description = <"*">
				>
				["at0094"] = <
					text = <"Borderline">
					description = <"*">
				>
				["at0095"] = <
					text = <"Mild">
					description = <"*">
				>
				["at0096"] = <
					text = <"Moderate">
					description = <"*">
				>
				["at0097"] = <
					text = <"Severe">
					description = <"*">
				>
				["at0098"] = <
					text = <"Profound">
					description = <"*">
				>
				["at0099"] = <
					text = <"Appendicular Ataxia Left">
					description = <"*">
				>
				["at0100"] = <
					text = <"Normal">
					description = <"*">
				>
				["at0101"] = <
					text = <"Mild">
					description = <"*">
				>
				["at0102"] = <
					text = <"Moderate">
					description = <"*">
				>
				["at0103"] = <
					text = <"Severe">
					description = <"*">
				>
				["at0104"] = <
					text = <"Abasia">
					description = <"*">
				>
				["at0105"] = <
					text = <"No">
					description = <"*">
				>
				["at0106"] = <
					text = <"Yes">
					description = <"*">
				>
				["at0108"] = <
					text = <"Astasia">
					description = <"*">
				>
				["at0109"] = <
					text = <"No">
					description = <"*">
				>
				["at0110"] = <
					text = <"Yes">
					description = <"*">
				>
				["at0111"] = <
					text = <"Anarthria">
					description = <"*">
				>
				["at0112"] = <
					text = <"No">
					description = <"*">
				>
				["at0113"] = <
					text = <"Yes">
					description = <"*">
				>
				["at0114"] = <
					text = <"Gait and Balance">
					description = <"*">
				>
				["at0115"] = <
					text = <"Speech Disturbance">
					description = <"*">
				>
				["at0116"] = <
					text = <"Appendicular Ataxia Right Side">
					description = <"*">
				>
				["at0117"] = <
					text = <"Appendicular Ataxia Left Side">
					description = <"*">
				>
				["at0118"] = <
					text = <"Gait Ataxia">
					description = <"*">
				>
				["at0119"] = <
					text = <"Standing Instability">
					description = <"*">
				>
				["at0120"] = <
					text = <"Upper and Lower Limb Coordination ">
					description = <"*">
				>
				["at0121"] = <
					text = <"Appendicular Ataxia">
					description = <"*">
				>
				["at0122"] = <
					text = <"Appendicular Ataxia">
					description = <"*">
				>
				["at0123"] = <
					text = <"Normal">
					description = <"*">
				>
				["at0124"] = <
					text = <"Mild">
					description = <"*">
				>
				["at0125"] = <
					text = <"Moderate">
					description = <"*">
				>
				["at0126"] = <
					text = <"Severe">
					description = <"*">
				>
				["at0127"] = <
					text = <"Overall Status">
					description = <"Narrative summary about the patient status">
				>
			>
		>
	>
	term_bindings = <
		["HPO2015_04_20"] = <
			items = <
				["at0002"] = <[HPO2015_04_20::HP0002066]>
				["at0003"] = <[HPO2015_04_20::NA]>
				["at0004"] = <[HPO2015_04_20::HP0012825]>
				["at0005"] = <[HPO2015_04_20::HP0012826]>
				["at0006"] = <[HPO2015_04_20::HP0012828]>
				["at0007"] = <[HPO2015_04_20::new02]>
				["at0008"] = <[HPO2015_04_20::NA]>
				["at0009"] = <[HPO2015_04_20::HP0012825]>
				["at0010"] = <[HPO2015_04_20::HP0012826]>
				["at0011"] = <[HPO2015_04_20::HP0012828]>
				["at0012"] = <[HPO2015_04_20::new03]>
				["at0013"] = <[HPO2015_04_20::NA]>
				["at0014"] = <[HPO2015_04_20::HP0012825]>
				["at0015"] = <[HPO2015_04_20::HP0012826]>
				["at0016"] = <[HPO2015_04_20::HP0012828]>
				["at0017"] = <[HPO2015_04_20::HP0001260]>
				["at0018"] = <[HPO2015_04_20::NA]>
				["at0019"] = <[HPO2015_04_20::HP0012825]>
				["at0020"] = <[HPO2015_04_20::HP0012826]>
				["at0021"] = <[HPO2015_04_20::HP0012828]>
				["at0022"] = <[HPO2015_04_20::new05]>
				["at0023"] = <[HPO2015_04_20::NA]>
				["at0024"] = <[HPO2015_04_20::HP0012825]>
				["at0025"] = <[HPO2015_04_20::HP0012826]>
				["at0026"] = <[HPO2015_04_20::HP0012828]>
				["at0027"] = <[HPO2015_04_20::HP0002080]>
				["at0028"] = <[HPO2015_04_20::NA]>
				["at0029"] = <[HPO2015_04_20::HP0012825]>
				["at0030"] = <[HPO2015_04_20::HP0012826]>
				["at0031"] = <[HPO2015_04_20::HP0012828]>
				["at0032"] = <[HPO2015_04_20::HP0002075]>
				["at0033"] = <[HPO2015_04_20::NA]>
				["at0034"] = <[HPO2015_04_20::HP0012825]>
				["at0035"] = <[HPO2015_04_20::HP0012826]>
				["at0036"] = <[HPO2015_04_20::HP0012828]>
				["at0037"] = <[HPO2015_04_20::new08]>
				["at0038"] = <[HPO2015_04_20::NA]>
				["at0039"] = <[HPO2015_04_20::HP0012825]>
				["at0040"] = <[HPO2015_04_20::HP0012826]>
				["at0041"] = <[HPO2015_04_20::HP0012828]>
				["at0042"] = <[HPO2015_04_20::HP0012827]>
				["at0043"] = <[HPO2015_04_20::HP0012829]>
				["at0044"] = <[HPO2015_04_20::HP0012827]>
				["at0045"] = <[HPO2015_04_20::HP0012829]>
				["at0046"] = <[HPO2015_04_20::HP0012827]>
				["at0047"] = <[HPO2015_04_20::HP0012829]>
				["at0048"] = <[HPO2015_04_20::HP0012827]>
				["at0049"] = <[HPO2015_04_20::HP0012829]>
				["at0050"] = <[HPO2015_04_20::HP0012827]>
				["at0051"] = <[HPO2015_04_20::HP0012829]>
				["at0052"] = <[HPO2015_04_20::HP0012827]>
				["at0053"] = <[HPO2015_04_20::HP0012829]>
				["at0054"] = <[HPO2015_04_20::HP0012827]>
				["at0055"] = <[HPO2015_04_20::HP0012829]>
				["at0056"] = <[HPO2015_04_20::HP0012827]>
				["at0057"] = <[HPO2015_04_20::HP0012829]>
			>
		>
	>
